# Supplementary material for: Comparative safety and effectiveness of cholinesterase inhibitors and memantine for Alzheimer’s disease: a network meta-analysis of 41 randomized controlled trials
Source: Springer Nature journal article supplement (doi:10.1186/s13195-018-0457-9), 2018-12-01
Supplement: MOESM1 [file 16359830]

## Contents of Supplementary

|                  |                                                                                    |         |
|------------------|------------------------------------------------------------------------------------|---------|
| Supplementary 1  | Network meta-analysis model                                                        | Page 1  |
| Supplementary 2  | References for included trials                                                     | Page 5  |
| Supplementary 3  | Summary of included trials and patients characteristics                            | Page 9  |
| Supplementary 4  | Risk of bias assessment                                                            | Page 14 |
| Supplementary 5  | Results from pair-wise meta-analysis for each outcome                              | Page 17 |
| Supplementary 6  | Results from network meta-analysis for each outcome                                | Page 24 |
| Supplementary 7  | Network plot for each outcome                                                      | Page 29 |
| Supplementary 8  | Treatment ranking and rankograms for each outcome                                  | Page 32 |
| Supplementary 9  | Assessment of inconsistency results for each outcome                               | Page 38 |
| Supplementary 10 | Comparison-adjusted funnel plot for each outcome from<br>the network meta-analysis | Page 47 |
| Supplementary 11 | Subgroup network meta-analysis for secondary outcomes                              | Page 54 |
| Supplementary 12 | Sensitivity network meta-analysis for primary outcomes                             | Page 58 |
| Supplementary 13 | Assessment of heterogeneity results for each outcome                               | Page 61 |

## Supplementary 1: Network meta-analysis model

### 1. Random Effects Model for Continuous Data in WinBUGS

```
model {
  for(i in 1:ns) {
    w[i,1]<- 0
    delta[i,t[i,1]]<- 0

    ss[i]<- sum(n[i,1:na[i]])
    nom[i]<- sum(nom1[i,1:na[i]])
    pooled.sd[i]<- sqrt(nom[i]/(ss[i]-na[i]))
    J[i]<- 1-(3/((4*(ss[i]-na[i]))-1))

#Normal Likelihood#

    for (k in 1:na[i]) {
      y[i,k] ~ dnorm(phi[i,t[i,k]],prec[i,k])

      se[i,k]<- sd[i,k]/sqrt(n[i,k])
      var[i,k]<- se[i,k]*se[i,k]
      prec[i,k]<- 1/var[i,k]
      nom1[i,k]<- (n[i,k]-1)*sd[i,k]*sd[i,k]
    }

#Parameterization of the model#

    phi[i,t[i,1]]<- u[i]*(pooled.sd[i]/J[i])

    for (k in 2:na[i]) {
      phi[i,t[i,k]]<- (u[i]+delta[i,t[i,k]])*(pooled.sd[i]/J[i])
      delta[i,t[i,k]] ~ dnorm(md[i,t[i,k]],taud[i,t[i,k]])
      md[i,t[i,k]]<- d[t[i,k]] - d[t[i,1]] + sw[i,k]
      taud[i,t[i,k]]<- tau *2*(k-1)/k
      w[i,k]<- (delta[i,t[i,k]] - d[t[i,k]] + d[t[i,1]])
      sw[i,k]<- sum(w[i,1:k-1])/(k-1)
    }
  }

#Priors#

  SD ~ dnorm(0,1)I(0,1)
  tau<- 1/pow(SD,2)

  for(k in 1:(ref-1)) {
```

```

    d[k] ~ dnorm(0,.0001)
  }
  for(k in (ref+1):nt) {
    d[k] ~ dnorm(0,.0001)
  }
  for(i in 1:ns) {
    u[i] ~ dnorm(0,.0001)
  }

```

#Estimated & Predicted Standardized Mean Differences#

```

d[ref]<- 0

for (c in 1:(ref-1)) {
  SMD.ref[c]<- d[c] - d[ref]
  predSMD.ref[c] ~ dnorm( SMD.ref[c],tau)
}
for (c in (ref+1):nt) {
  SMD.ref[c]<- d[c] - d[ref]
  predSMD.ref[c] ~ dnorm( SMD.ref[c],tau)
}
for (c in 1:(nt-1)) {
  for (k in (c+1):nt) {
    SMD[c,k]<- d[k] - d[c]
    predSMD[c,k] ~ dnorm(SMD[c,k],tau)
  }
}

```

#Ranking of treatments#

```

for(k in 1:nt) {
  order[k]<-nt+1-rank(d[,k])
# this is when the outcome is positive - omit 'nt+1-' when the outcome is negative
  most.effective[k]<-equals(order[k],1)

  for(j in 1:nt) {
    effectiveness[k,j]<- equals(order[k],j)
  }
}
for(k in 1:nt) {
  for(j in 1:nt) {
    cumeffectiveness[k,j]<- sum(effectiveness[k,1:j])
  }
}

```

```
#SUCRAS#
```

```
for(k in 1:nt) {  
  SUCRA[k]<- sum(cumeffectiveness[k,1:(nt-1)])/(nt-1)  
}
```

```
#Fit of the Model#
```

```
for(i in 1:ns) {  
  for(k in 1:na[i]) {  
    Darm[i,k]<-(y[i,k]-phi[i,t[i,k]])*(y[i,k]-phi[i,t[i,k]])/var[i,k]  
  }  
  D[i]<- sum(Darm[i,1:na[i]])  
}  
D.bar<- sum(D[])  
}‘
```

## 2. Random Effects Model for Dichotomous Data in WinBUGS

```
# Binomial likelihood, logit link
```

```
# Random effects model for multi-arm trials
```

```
model{  
  # *** PROGRAM STARTS  
  for(i in 1:ns){  
    # LOOP THROUGH STUDIES  
    w[i,1] <- 0 # adjustment for multi-arm trials is zero for control arm  
    delta[i,1] <- 0 # treatment effect is zero for control arm  
    mu[i] ~ dnorm(0,.0001) # vague priors for all trial baselines  
    for (k in 1:na[i]) {  
      # LOOP THROUGH ARMS  
      r[i,k] ~ dbin(p[i,k],n[i,k]) # binomial likelihood  
      logit(p[i,k]) <- mu[i] + delta[i,k] # model for linear predictor  
      rhat[i,k] <- p[i,k] * n[i,k] # expected value of the numerators  
#Deviance contribution  
      dev[i,k] <- 2 * (r[i,k] * (log(r[i,k])-log(rhat[i,k]))  
        + (n[i,k]-r[i,k]) * (log(n[i,k]-r[i,k]) - log(n[i,k]-rhat[i,k])))  
    }  
# summed residual deviance contribution for this trial  
    resdev[i] <- sum(dev[i,1:na[i]])  
    for (k in 2:na[i]) {  
      # LOOP THROUGH ARMS  
# trial-specific LOR distributions  
      delta[i,k] ~ dnorm(md[i,k],taud[i,k])  
# mean of LOR distributions (with multi-arm trial correction)  
      md[i,k] <- d[t[i,k]] - d[t[i,1]] + sw[i,k]  
# precision of LOR distributions (with multi-arm trial correction)  
      taud[i,k] <- tau *2*(k-1)/k  
# adjustment for multi-arm RCTs  
      w[i,k] <- (delta[i,k] - d[t[i,k]] + d[t[i,1]])  
# cumulative adjustment for multi-arm trials
```

```

        sw[i,k] <- sum(w[i,1:k-1])/(k-1)
    }
}
totresdev <- sum(resdev[])          # Total Residual Deviance
d[1]<-0          # treatment effect is zero for reference treatment
# vague priors for treatment effects
for (k in 2:nt){  d[k] ~ dnorm(0,.0001) }
sd ~ dunif(0,5)   # vague prior for between-trial SD
tau <- pow(sd,-2) # between-trial precision = (1/between-trial variance)
for (c in 1:(nt-1))
    { for (k in (c+1):nt)
        { lor[c,k] <- d[k] - d[c]
          log(or[c,k]) <- lor[c,k]
        }
    }
for(k in 1:nt) {
    order[k]<- nt+1-rank(d[,k])
# this is when the outcome is positive - omit 'nt+1-' when the outcome is negative
    most.effective[k]<-equals(order[k],1)

    for(j in 1:nt) {
        effectiveness[k,j]<- equals(order[k],j)
    }
}
for(k in 1:nt) {
    for(j in 1:nt) {
        cumeffectiveness[k,j]<- sum(effectiveness[k,1:j])
    }
}

for(k in 1:nt) {
    cum[k]<- sum(effectiveness[k,1:4]) /4
}

#SUCRAS#
for(k in 1:nt) {
    SUCRA[k]<- sum(cumeffectiveness[k,1:(nt-1)])/(nt-1)
}
}          # *** PROGRAM ENDS

```

## **Supplementary 2: References for included trials**

- [1] Rogers SL, Doody RS, Mohs RC, Friedhoff LT. Donepezil improves cognition and global function in Alzheimer disease: a 15-week, double-blind, placebo-controlled study. Donepezil Study Group. *Archives of internal medicine* 1998; 158(9): 1021-31.
- [2] Rogers SL, Farlow MR, Doody RS, Mohs R, Friedhoff LT. A 24-week, double-blind, placebo-controlled trial of donepezil in patients with Alzheimer's disease. Donepezil Study Group. *Neurology* 1998; 50(1): 136-45.
- [3] Burns A, Rossor M, Hecker J, Gauthier S, Petit H, Moller HJ, et al. The effects of donepezil in Alzheimer's disease - results from a multinational trial. *Dementia and geriatric cognitive disorders* 1999; 10(3): 237-44.
- [4] Homma A, Takeda M, Imai Y, Udaka F, Hasegawa K, Kameyama M, et al. Clinical efficacy and safety of donepezil on cognitive and global function in patients with Alzheimer's disease. A 24-week, multicenter, double-blind, placebo-controlled study in Japan. E2020 Study Group. *Dementia and geriatric cognitive disorders* 2000; 11(6): 299-313.
- [5] Homma A, Imai Y, Tago H, Asada T, Shigeta M, Iwamoto T, et al. Donepezil treatment of patients with severe Alzheimer's disease in a Japanese population: results from a 24-week, double-blind, placebo-controlled, randomized trial. *Dementia and geriatric cognitive disorders* 2008; 25(5): 399-407.
- [6] Feldman H, Gauthier S, Hecker J, Vellas B, Subbiah P, Whalen E. A 24-week, randomized, double-blind study of donepezil in moderate to severe Alzheimer's disease. *Neurology* 2001; 57(4): 613-20.
- [7] Johannsen P, Salmon E, Hampel H, Xu Y, Richardson S, Qvitzau S, et al. Assessing therapeutic efficacy in a progressive disease: a study of donepezil in Alzheimer's disease. *CNS drugs* 2006; 20(4): 311-25.
- [8] Seltzer B, Zolnouri P, Nunez M, Goldman R, Kumar D, Ieni J, et al. Efficacy of donepezil in early-stage Alzheimer disease: a randomized placebo-controlled trial. *Archives of neurology* 2004; 61(12): 1852-6.
- [9] Winblad B, Kilander L, Eriksson S, Minthon L, Batsman S, Wetterholm AL, et al. Donepezil in patients with severe Alzheimer's disease: double-blind, parallel-group, placebo-controlled study. *Lancet (London, England)* 2006; 367(9516): 1057-65.
- [10] Black SE, Doody R, Li H, McRae T, Jambor KM, Xu Y, et al. Donepezil preserves cognition and global function in patients with severe Alzheimer disease. *Neurology* 2007; 69(5): 459-69.
- [11] Maher-Edwards G, Dixon R, Hunter J, Gold M, Hopton G, Jacobs G, et al. SB-742457 and donepezil in Alzheimer disease: a randomized, placebo-controlled study. *International journal of geriatric psychiatry* 2011; 26(5): 536-44.
- [12] Farlow MR, Salloway S, Tariot PN, Yardley J, Moline ML, Wang Q, et al. Effectiveness and tolerability of high-dose (23 mg/d) versus standard-dose (10 mg/d) donepezil in moderate to severe Alzheimer's disease: A 24-week, randomized, double-blind study. *Clinical therapeutics* 2010; 32(7): 1234-51.
- [13] Homma A, Atarashi H, Kubota N, Nakai K, Takase T. Efficacy and Safety of Sustained Release Donepezil High Dose versus Immediate Release Donepezil Standard Dose in Japanese Patients with Severe Alzheimer's Disease: A Randomized, Double-Blind Trial.

- Journal of Alzheimer's disease : JAD 2016; 52(1): 345-57.
- [14] Howard RJ, Juszcak E, Ballard CG, Bentham P, Brown RG, Bullock R, et al. Donepezil for the treatment of agitation in Alzheimer's disease. *The New England journal of medicine* 2007; 357(14): 1382-92.
  - [15] Tariot PN, Solomon PR, Morris JC, Kershaw P, Lilienfeld S, Ding C. A 5-month, randomized, placebo-controlled trial of galantamine in AD. *The Galantamine USA-10 Study Group. Neurology* 2000; 54(12): 2269-76.
  - [16] Brodaty H, Corey-Bloom J, Potocnik FC, Truyen L, Gold M, Damaraju CR. Galantamine prolonged-release formulation in the treatment of mild to moderate Alzheimer's disease. *Dementia and geriatric cognitive disorders* 2005; 20(2-3): 120-32.
  - [17] Burns A, Bernabei R, Bullock R, Cruz Jentoft AJ, Frolich L, Hock C, et al. Safety and efficacy of galantamine (Reminyl) in severe Alzheimer's disease (the SERAD study): a randomised, placebo-controlled, double-blind trial. *The Lancet Neurology* 2009; 8(1): 39-47.
  - [18] Raskind MA, Peskind ER, Wessel T, Yuan W. Galantamine in AD: A 6-month randomized, placebo-controlled trial with a 6-month extension. *The Galantamine USA-1 Study Group. Neurology* 2000; 54(12): 2261-8.
  - [19] Wilcock GK, Lilienfeld S, Gaens E. Efficacy and safety of galantamine in patients with mild to moderate Alzheimer's disease: multicentre randomised controlled trial. *Galantamine International-1 Study Group. BMJ (Clinical research ed)* 2000; 321(7274): 1445-9.
  - [20] Hager K, Baseman AS, Nye JS, Brashear HR, Han J, Sano M, et al. Effects of galantamine in a 2-year, randomized, placebo-controlled study in Alzheimer's disease. *Neuropsychiatric disease and treatment* 2014; 10: 391-401.
  - [21] Rockwood K, Fay S, Song X, MacKnight C, Gorman M. Attainment of treatment goals by people with Alzheimer's disease receiving galantamine: a randomized controlled trial. *CMAJ : Canadian Medical Association journal = journal de l'Association medicale canadienne* 2006; 174(8): 1099-105.
  - [22] Wilkinson D, Murray J. Galantamine: a randomized, double-blind, dose comparison in patients with Alzheimer's disease. *International journal of geriatric psychiatry* 2001; 16(9): 852-7.
  - [23] Rosler M, Anand R, Cicin-Sain A, Gauthier S, Agid Y, Dal-Bianco P, et al. Efficacy and safety of rivastigmine in patients with Alzheimer's disease: international randomised controlled trial. *BMJ (Clinical research ed)* 1999; 318(7184): 633-8.
  - [24] Feldman HH, Lane R. Rivastigmine: a placebo controlled trial of twice daily and three times daily regimens in patients with Alzheimer's disease. *Journal of neurology, neurosurgery, and psychiatry* 2007; 78(10): 1056-63.
  - [25] Winblad B, Cummings J, Andreasen N, Grossberg G, Onofrj M, Sadowsky C, et al. A six-month double-blind, randomized, placebo-controlled study of a transdermal patch in Alzheimer's disease--rivastigmine patch versus capsule. *International journal of geriatric psychiatry* 2007; 22(5): 456-67.
  - [26] Farlow MR, Grossberg GT, Sadowsky CH, Meng X, Somogyi M. A 24-week, randomized, controlled trial of rivastigmine patch 13.3 mg/24 h versus 4.6 mg/24 h in severe Alzheimer's dementia. *CNS neuroscience & therapeutics* 2013; 19(10): 745-52.
  - [27] Cummings J, Froelich L, Black SE, Bakchine S, Bellelli G, Molinuevo JL, et al. Randomized, double-blind, parallel-group, 48-week study for efficacy and safety of a higher-dose

- rivastigmine patch (15 vs. 10 cm<sup>2</sup>) in Alzheimer's disease. *Dementia and geriatric cognitive disorders* 2012; 33(5): 341-53.
- [28] Nakamura Y, Imai Y, Shigeta M, Graf A, Shirahase T, Kim H, et al. A 24-week, randomized, double-blind, placebo-controlled study to evaluate the efficacy, safety and tolerability of the rivastigmine patch in Japanese patients with Alzheimer's disease. *Dementia and geriatric cognitive disorders extra* 2011; 1(1): 163-79.
- [29] Zhang ZX, Hong Z, Wang YP, He L, Wang N, Zhao ZX, et al. Rivastigmine Patch in Chinese Patients with Probable Alzheimer's disease: A 24-week, Randomized, Double-Blind Parallel-Group Study Comparing Rivastigmine Patch (9.5 mg/24 h) with Capsule (6 mg Twice Daily). *CNS neuroscience & therapeutics* 2016; 22(6): 488-96.
- [30] Karaman Y, Erdogan F, Koseoglu E, Turan T, Ersoy AO. A 12-month study of the efficacy of rivastigmine in patients with advanced moderate Alzheimer's disease. *Dementia and geriatric cognitive disorders* 2005; 19(1): 51-6.
- [31] Reisberg B, Doody R, Stoffler A, Schmitt F, Ferris S, Mobius HJ. Memantine in moderate-to-severe Alzheimer's disease. *The New England journal of medicine* 2003; 348(14): 1333-41.
- [32] Peskind ER, Potkin SG, Pomara N, Ott BR, Graham SM, Olin JT, et al. Memantine treatment in mild to moderate Alzheimer disease: a 24-week randomized, controlled trial. *The American journal of geriatric psychiatry : official journal of the American Association for Geriatric Psychiatry* 2006; 14(8): 704-15.
- [33] van Dyck CH, Tariot PN, Meyers B, Malca Resnick E. A 24-week randomized, controlled trial of memantine in patients with moderate-to-severe Alzheimer disease. *Alzheimer disease and associated disorders* 2007; 21(2): 136-43.
- [34] Bakchine S, Loft H. Memantine treatment in patients with mild to moderate Alzheimer's disease: results of a randomised, double-blind, placebo-controlled 6-month study. *Journal of Alzheimer's disease : JAD* 2008; 13(1): 97-107.
- [35] Herrmann N, Gauthier S, Boneva N, Lemming OM. A randomized, double-blind, placebo-controlled trial of memantine in a behaviorally enriched sample of patients with moderate-to-severe Alzheimer's disease. *International psychogeriatrics* 2013; 25(6): 919-27.
- [36] Wang T, Huang Q, Reiman EM, Chen K, Li X, Li G, et al. Effects of memantine on clinical ratings, fluorodeoxyglucose positron emission tomography measurements, and cerebrospinal fluid assays in patients with moderate to severe Alzheimer dementia: a 24-week, randomized, clinical trial. *Journal of clinical psychopharmacology* 2013; 33(5): 636-42.
- [37] Howard R, McShane R, Lindesay J, Ritchie C, Baldwin A, Barber R, et al. Donepezil and memantine for moderate-to-severe Alzheimer's disease. *The New England journal of medicine* 2012; 366(10): 893-903.
- [38] Tariot PN, Farlow MR, Grossberg GT, Graham SM, McDonald S, Gergel I. Memantine treatment in patients with moderate to severe Alzheimer disease already receiving donepezil: a randomized controlled trial. *Jama* 2004; 291(3): 317-24.
- [39] Shao ZQ. Comparison of the efficacy of four cholinesterase inhibitors in combination with memantine for the treatment of Alzheimer's disease. *International journal of clinical and experimental medicine* 2015; 8(2): 2944-8.
- [40] Zhang N, Wei C, Du H, Shi FD, Cheng Y. The Effect of Memantine on Cognitive Function and Behavioral and Psychological Symptoms in Mild-to-Moderate Alzheimer's Disease



Patients. *Dementia and geriatric cognitive disorders* 2015; 40(1-2): 85-93.

- [41] Bullock R, Touchon J, Bergman H, Gambina G, He Y, Rapatz G, et al. Rivastigmine and donepezil treatment in moderate to moderately-severe Alzheimer's disease over a 2-year period. *Current medical research and opinion* 2005; 21(8): 1317-27.

**Supplementary 3:  
Summary of included trials and patients characteristics**

| Study                | Criteria     | Patients (n)          | Duration (weeks) | Age (SD)   | Gender (%female) | Race (% white) | Disease severity          | Baseline MMSE (SD) |
|----------------------|--------------|-----------------------|------------------|------------|------------------|----------------|---------------------------|--------------------|
| <b>Donepezil</b>     |              |                       |                  |            |                  |                |                           |                    |
| Rogers et al 1998a   | DSM-III-R    | Donepezil 5 mg (157)  | 12               | 73.8 (8.4) | 69               | 95             | Mild to moderately severe | 19.4 (4.9)         |
|                      | NINCDS-ADRDA | Donepezil 10 mg (158) |                  | 73.4 (8.2) | 61               | 96             |                           | 19.4 (5.0)         |
|                      |              | Placebo (153)         |                  | 74.0 (8.0) | 61               | 96             |                           | 19.8 (4.3)         |
| Rogers et al 1998b   | DSM-III-R    | Donepezil 5 mg (154)  | 24               | 72.9 (7.5) | 63               | 95             | Mild to moderate          | 19.0 (5.0)         |
|                      | NINCDS-ADRDA | Donepezil 10 mg (157) |                  | 74.6 (7.5) | 62               | 96             |                           | 18.9 (5.0)         |
|                      |              | Placebo (162)         |                  | 72.6 (7.6) | 61               | 94             |                           | 19.2 (5.1)         |
| Burns et al 1999     | DSM-III-R    | Donepezil 5 mg (271)  | 24               | 72.0 (8.2) | 61               | 100            | Mild to moderately severe | 20.0 (4.9)         |
|                      | NINCDS-ADRDA | Donepezil 10 mg (273) |                  | 72.0 (8.3) | 57               | 99             |                           | 20.0 (3.3)         |
|                      |              | Placebo (274)         |                  | 71.0 (8.3) | 55               | 99             |                           | 20.0 (5.0)         |
| Homma et al 2000     | DSM-IV       | Donepezil 5 mg (116)  | 24               | 70.1 (7.6) | 68               | Japanese       | Mild to moderately severe | 17.8 (3.9)         |
|                      |              | Placebo (112)         |                  | 69.4 (8.8) | 66               |                |                           | 16.6 (3.9)         |
| Homma et al 2008     | DSM-IV       | Donepezil 5 mg (96)   | 24               | 78.0 (8.9) | 79.2             | Japanese       | Severe                    | 7.9 (3.3)          |
|                      |              | Donepezil 10 mg (92)  |                  | 76.9 (7.9) | 79.3             |                |                           | 7.4 (3.4)          |
|                      |              | Placebo (102)         |                  | 79.7 (7.5) | 82.4             |                |                           | 8.0 (3.3)          |
| Feldman et al 2001   | NINCDS-ADRDA | Donepezil 10 mg (144) | 24               | 73.3       | 61.1             | ...            | Moderate to severe        | 11.7 (4.2)         |
|                      |              | Placebo (146)         |                  | 74         | 61               | ...            |                           | 12.0 (4.1)         |
| Johannsen et al 2006 | DSM-IV       | Donepezil 10 mg (99)  | 12               | 74.1 (7.6) | 59.6             | ...            | Mild to moderate          | 18.8 (4.8)         |
|                      | NINCDS-ADRDA | Placebo (103)         |                  | 71.4 (9.3) | 63.1             | ...            |                           | 18.5 (4.8)         |
| Seltzer et al 2004   | DSM-IV       | Donepezil 10 mg (96)  | 24               | 73.3 (9.6) | 50               | ...            | Mild to moderate          | 24.1 (1.7)         |
|                      | NINCDS-ADRDA | Placebo (57)          |                  | 75.1 (8.8) | 60               | ...            |                           | 24.3 (1.3)         |

|                               |                        |                                                                     |    |                                        |                      |                   |                    |                                        |
|-------------------------------|------------------------|---------------------------------------------------------------------|----|----------------------------------------|----------------------|-------------------|--------------------|----------------------------------------|
| Winblad et al<br>2006         | DSM-IV<br>NINCDS-ADRDA | Donepezil 10 mg (128)<br>Placebo (120)                              | 24 | 84.5 (6.0)<br>85.3 (5.9)               | 79<br>74             | 100<br>99         | Severe             | 6.0 (3.0)<br>6.2 (3.0)                 |
| Black et al<br>2007           | DSM-IV<br>NINCDS-ADRDA | Donepezil 10 mg (176)<br>Placebo (167)                              | 24 | 78.0 (8.0)<br>78.0 (8.2)               | 72.7<br>67.7         | 76.1<br>76        | Severe             | 7.5 (3.3)<br>7.4 (3.6)                 |
| Maher-Edwards<br>et al ; 2011 | DSM-IV<br>NINCDS-ADRDA | Donepezil 10 mg (67)<br>Placebo (61)                                | 24 | 71.1 (8.4)<br>71.6 (6.7)               | 63<br>70             | ...<br>...        | Mild to moderate   | 19.2 (3.2)<br>18.3 (3.4)               |
| Farlow et al<br>2010          | DSM-IV<br>NINCDS-ADRDA | Donepezil 23 mg (963)<br>Donepezil 10 mg (471)                      | 24 | 73.9 (8.5)<br>73.8 (8.6)               | 63<br>62.4           | 73.5<br>73.5      | Moderate to severe | 13.1 (5.0)<br>13.1 (4.7)               |
| Homma et al<br>2016           | MMSE                   | Donepezil 10 mg (166)<br>Donepezil 23 mg (185)                      | 24 | 76.2 (8.8)<br>75.7 (8.8)               | 69.6<br>69.3         | Japanese          | Severe             | 8.9 (3.1)<br>8.5 (3.2)                 |
| Howard et al<br>2007          | NINCDS-ADRDA           | Donepezil 10 mg (128)<br>Placebo (131)                              | 12 | 84.9 (7.3)<br>84.4 (8.2)               | 82<br>87             | 98.4<br>96.2      | Severe             | 8.1 (5.9)<br>8.2 (6.8)                 |
| <b>Galantamine</b>            |                        |                                                                     |    |                                        |                      |                   |                    |                                        |
| Tariot et al<br>2000          | NINCDS-ADRDA           | Galantamine 24 mg (273)<br>Placebo(286)                             | 21 | 77.7 (6.6)<br>77.1 (8.5)               | 67<br>62.2           | 91<br>93          | Mild to moderate   | 17.7 (3.3)<br>17.7 (3.4)               |
| Brody et al<br>2005           | NINCDS-ADRDA           | Galantamine 24 mg (327)<br>Placebo (324)                            | 26 | 76.5 (7.8)<br>76.3 (8.0)               | 64<br>64             | 90<br>90          | Mild to moderate   | 17.8 (4.1)<br>18.1 (4.1)               |
| Burns et al<br>2009           | DSM-IV<br>NINCDS-ADRDA | Galantamine 24 mg (207)<br>Placebo (200)                            | 26 | 83.7 (5.7)<br>83.5 (5.8)               | 81<br>81             | ...<br>...        | Severe             | 8.8 (2.4)<br>9.1 (2.4)                 |
| Raskind et al<br>2000         | NINCDS-ADRDA           | Galantamine 24 mg (212)<br>Galantamine 32 mg (211)<br>Placebo (213) | 24 | 75.9 (7.3)<br>75.0 (8.7)<br>75.3 (8.8) | 65.6<br>58.8<br>61.5 | 92<br>90<br>92    | Mild to moderate   | 19.5 (4.4)<br>19.1 (4.4)<br>19.2 (4.4) |
| Wilcock et al<br>2000         | NINCDS-ADRDA           | Galantamine 24 mg (220)<br>Galantamine 32 mg (218)<br>Placebo (215) | 24 | 71.9 (8.3)<br>72.1 (8.6)<br>72.7 (7.6) | 63.2<br>63.3<br>61.4 | ...<br>...<br>... | Mild to moderate   | 19.5 (3.4)<br>19.0 (3.8)<br>19.3 (3.5) |

|                         |                           |                                                                                  |     |                                        |                      |                      |                           |                                        |
|-------------------------|---------------------------|----------------------------------------------------------------------------------|-----|----------------------------------------|----------------------|----------------------|---------------------------|----------------------------------------|
| Hager et al<br>2014     | NINCDS-ADRDA              | Galantamine 24 mg (1024)<br>Placebo (1021)                                       | 104 | 73.0 (8.9)<br>73.0 (8.7)               | 65.5<br>64.1         | 100<br>99.7          | Mild to moderately severe | 19.0 (4.2)<br>19.0 (4.0)               |
| Rockwood et al<br>2006  | NINCDS-ADRDA              | Galantamine 24 mg (64)<br>Placebo (66)                                           | 16  | 77.0 (8.0)<br>78.0 (8.0)               | 64<br>62             | ...<br>...           | Mild to moderate          | 20.8 (3.3)<br>19.9 (4.2)               |
| Wilkinson et al<br>2001 | DSM-III-R<br>NINCDS-ADRDA | Galantamine 24 mg (56)<br>Placebo (87)                                           | 12  | 72.9 (8.2)<br>74.2 (8.4)               | 59<br>59             | ...<br>...           | Mild to moderate          | 18.2 (3.0)<br>18.7 (2.8)               |
| <b>Rivastigmine</b>     |                           |                                                                                  |     |                                        |                      |                      |                           |                                        |
| Rösler et al<br>1999    | DSM-IV<br>NINCDS-ADRDA    | Rivastigmine 12 mg (243)<br>Placebo (239)                                        | 26  | 72<br>72                               | 59<br>59             | 97<br>97             | Mild to moderately severe | 19.9                                   |
| Feldman et al<br>2007a  | DSM-IV<br>NINCDS-ADRDA    | Rivastigmine 12 mg (227)<br>Placebo (222)                                        | 26  | 71.4 (7.9)<br>71.7 (8.7)               | 60<br>60             | ...<br>...           | Mild to moderate          | 18.3 (4.5)<br>18.7 (4.6)               |
| Winblad et al<br>2007   | DSM-IV<br>NINCDS-ADRDA    | Patch 10 cm <sup>2</sup> (293)<br>Rivastigmine 12 mg (297)<br>Placebo (302)      | 24  | 73.6 (7.9)<br>72.8 (8.2)<br>73.9 (7.3) | 68<br>65.6<br>66.6   | 75.6<br>74.5<br>75.2 | Mild to moderate          | 16.6 (3.1)<br>16.4 (3.1)<br>16.4 (3.0) |
| Farlow et al<br>2013    | NINCDS-ADRDA              | Patch 15 cm <sup>2</sup> (356)<br>Patch 5 cm <sup>2</sup> (360)                  | 24  | 77.6 (8.7)<br>76.5 (9.4)               | 63.8<br>65           | 86<br>88.6           | Severe                    | 8.8 (2.9)<br>8.8 (3.0)                 |
| Cummings et al<br>2012  | DSM-IV<br>NINCDS-ADRDA    | Patch 10 cm <sup>2</sup> (287)<br>Patch 15 cm <sup>2</sup> (280)                 | 48  | 75.9 (6.8)<br>75.6 (7.4)               | 63.4<br>66.1         | 98.3<br>95           | Mild to moderate          | 14.2 (4.6)<br>14.1 (4.8)               |
| Nakamura et al<br>2011  | DSM-IV<br>NINCDS-ADRDA    | Patch 5 cm <sup>2</sup> (282)<br>Patch 10 cm <sup>2</sup> (287)<br>Placebo (286) | 24  | 74.3 (7.5)<br>75.1 (6.9)<br>74.5 (7.4) | 68.8<br>67.9<br>68.2 | ...<br>...<br>...    | Mild to moderate          | 16.8 (2.9)<br>16.5 (3.1)<br>16.6 (2.9) |
| Zhang et al<br>2016     | NINCDS-ADRDA              | Patch 10 cm <sup>2</sup> (248)<br>Rivastigmine 12 mg (253)                       | 24  | 70.4 (8.0)<br>69.8 (8.2)               | 56.5<br>54.9         | Chinese<br>...       | Mild to moderate          | 16.0 (3.5)<br>16.6(3.1)                |
| Karaman et al<br>2005   | DSM-IV<br>NINCDS-ADRDA    | Rivastigmine 12 mg (24)<br>Placebo (20)                                          | 52  | 74.1 (4.3)<br>73.4 (4.0)               | 54.2<br>55           | ...<br>...           | Advanced moderate         | 11.4 (1.0)<br>13.2 (0.9)               |

| <b>Memantine</b>                |                        |                                                                                                           |    |             |      |      |                    |            |
|---------------------------------|------------------------|-----------------------------------------------------------------------------------------------------------|----|-------------|------|------|--------------------|------------|
| Reisberg et al<br>2003          | DSM-IV<br>NINCDS-ADRDA | Memantine 20 mg (126)<br>Placebo (126)                                                                    | 28 | 75.5 (8.2)  | 72.2 | 87.6 | Moderate to severe | 7.8 (3.8)  |
| Peskind et al<br>2006           | NINCDS-ADRDA           | Memantine 20 mg (201)<br>Placebo (202)                                                                    | 24 | 78 (7.3)    | 60.2 | 92   | Mild to moderate   | 17.4 (3.7) |
| van Dyck et al<br>2007          | NINCDS-ADRDA           | Memantine 20 mg (178)<br>Placebo (172)                                                                    | 24 | 78.1 (8.2)  | 72.5 | 79.8 | Moderate to severe | 10.0 (2.8) |
| Bakchine and<br>Loft et al,2008 | DSM-IV<br>NINCDS-ADRDA | Memantine 20 mg (318)<br>Placebo (152)                                                                    | 24 | 74.0 (7.4)  | 65   | 100  | Mild to moderate   | 18.6 (3.3) |
| Herrmann et al<br>2013          | NINCDS-ADRDA           | Memantine 20 mg (182)<br>Placebo (187)                                                                    | 24 | 74.7 (7.9)  | 57.7 | ...  | Moderate to severe | 11.9 (3.1) |
| Wang et al<br>2013              | DSM-IV<br>NINCDS-ADRDA | Memantine 20 mg (11)<br>Placebo (11)                                                                      | 24 | 65.7 (12.5) | 63.6 | ...  | Moderate to severe | 14.1 (4.6) |
| <b>Donepezil+Memantine</b>      |                        |                                                                                                           |    |             |      |      |                    |            |
| Howard et al<br>2012            | NINCDS-ADRDA           | Donepezil 10 mg +<br>Memantine 20 mg (73)<br>Donepezil 10 mg (73)<br>Memantine 20 mg (76)<br>Placebo (73) | 52 | 77.5 (9.0)  | 67   | 92   | Moderate to severe | 9.1 (2.6)  |
| Tariot et al<br>2004            | NINCDS-ADRDA           | Donepezil 10 mg (201)<br>Donepezil 10 mg +<br>Memantine 20 mg (202)                                       | 24 | 75.5 (8.7)  | 67   | 92.5 | Moderate to severe | 10.2 (3.0) |
| Shao et al<br>2015              | DSM-IV                 | Donepezil 10 mg +<br>Memantine 20 mg (22)                                                                 | 24 | 75.5 (8.5)  | 63   | 90.1 |                    | 9.9 (3.1)  |
|                                 |                        | Memantine 20 mg (22)                                                                                      |    | 73.0 (7.1)  | 50   | ...  | Mild to moderate   | 15.3 (1.6) |
|                                 |                        | Donepezil 10 mg +<br>Memantine 20 mg (22)                                                                 |    | 73.4 (6.0)  | 54.5 |      |                    | 15.1 (1.8) |

| <b>Donepezil vs memantine</b>    |              |                          |     |            |      |      |                        |            |
|----------------------------------|--------------|--------------------------|-----|------------|------|------|------------------------|------------|
| Zhang et al                      | NINCDS-ADRDA | Memantine 20 mg (80)     | 24  | 69.8 (8.0) | 61.3 | ...  | Mild to moderate       | 15.9 (4.4) |
| 2015                             |              | Donepezil 10 mg (87)     |     | 70.1 (8.0) | 59.8 | ...  |                        | 15.5 (4.2) |
| <b>Donepezil vs rivastigmine</b> |              |                          |     |            |      |      |                        |            |
| Bullock et al                    | DSM-IV       | Rivastigmine 12 mg (495) | 104 | 75.9 (6.6) | 68.9 | 98.6 | Moderate to moderately | 15.1 (3.0) |
| 2005                             | NINCDS-ADRDA | Donepezil 10 mg (499)    |     | 75.8 (6.8) | 68.5 | 99   | severe                 | 15.1 (2.9) |

Full references for all trials are given in Appendix 2. DSM-IV = Diagnostic and Statistical Manual of Mental Disorders, Fourth Edition; DSM-III-R = Diagnostic and Statistical Manual of Mental Disorders third edition, revision; NINCDS-ADRDA= The National Institute of Neurological and Communicative Disorders Association and Stroke-AD and Related Disorders Association; MMSE=Mini-mental State Examination; ...=Not available.

## Supplementary 4: Risk of bias assessment

Risk of bias summary: review authors' judgements about each risk of bias item for each included study.

|                        | Random sequence generation (selection bias) | Allocation concealment (selection bias) | Blinding of participants and personnel (performance bias) | Blinding of outcome assessment (detection bias) | Incomplete outcome data (attrition bias) | Selective reporting (reporting bias) | Other bias |
|------------------------|---------------------------------------------|-----------------------------------------|-----------------------------------------------------------|-------------------------------------------------|------------------------------------------|--------------------------------------|------------|
| Bakchine and Loft 2008 | ⊖                                           | ⊖                                       | ?                                                         | ?                                               | +                                        | ?                                    | ?          |
| Black 2007             | +                                           | ?                                       | +                                                         | +                                               | +                                        | ?                                    | ?          |
| Brody 2005             | +                                           | ?                                       | +                                                         | +                                               | +                                        | ?                                    | ?          |
| Bullock 2005           | +                                           | +                                       | +                                                         | +                                               | +                                        | ?                                    | ⊖          |
| Burns 1999             | ?                                           | ?                                       | ?                                                         | ?                                               | +                                        | +                                    | ?          |
| Burns 2009             | +                                           | +                                       | +                                                         | +                                               | +                                        | ?                                    | +          |
| Cummings 2012          | +                                           | +                                       | +                                                         | +                                               | +                                        | ?                                    | ?          |
| Farlow 2010            | +                                           | ⊖                                       | ?                                                         | +                                               | +                                        | ?                                    | ?          |
| Farlow 2013            | ?                                           | ⊖                                       | ?                                                         | ?                                               | ⊖                                        | ?                                    | ?          |
| Feldman 2001           | +                                           | +                                       | +                                                         | +                                               | +                                        | ?                                    | ?          |
| Feldman 2007           | ?                                           | +                                       | +                                                         | +                                               | +                                        | ?                                    | ⊖          |
| Hager 2014             | +                                           | ?                                       | +                                                         | +                                               | +                                        | ?                                    | ?          |
| Herrmann 2013          | +                                           | +                                       | +                                                         | +                                               | +                                        | +                                    | ?          |
| Homma 2000             | ?                                           | ?                                       | ?                                                         | ?                                               | +                                        | ?                                    | ?          |
| Homma 2008             | +                                           | +                                       | ?                                                         | ?                                               | +                                        | ?                                    | ?          |
| Homma 2016             | +                                           | ?                                       | ?                                                         | ?                                               | ⊖                                        | ?                                    | ?          |
| Howard 2007            | +                                           | +                                       | +                                                         | +                                               | +                                        | ?                                    | +          |
| Howard 2012            | +                                           | +                                       | ?                                                         | +                                               | +                                        | +                                    | ?          |
| Johannsen 2006         | +                                           | +                                       | ?                                                         | ?                                               | +                                        | ?                                    | ?          |

|                    | Random sequence generation (selection bias) | Allocation concealment (selection bias) | Blinding of participants and personnel (performance bias) | Blinding of outcome assessment (detection bias) | Incomplete outcome data (attrition bias) | Selective reporting (reporting bias) | Other bias |
|--------------------|---------------------------------------------|-----------------------------------------|-----------------------------------------------------------|-------------------------------------------------|------------------------------------------|--------------------------------------|------------|
| Karaman 2005       | +                                           | +                                       | ?                                                         | ?                                               | +                                        | ?                                    | ?          |
| Maher-Edwards 2011 | +                                           | ?                                       | ?                                                         | +                                               | +                                        | ?                                    | ?          |
| Nakamura 2011      | +                                           | +                                       | +                                                         | ?                                               | +                                        | +                                    | ?          |
| Peskind 2006       | +                                           | +                                       | +                                                         | +                                               | +                                        | ?                                    | ?          |
| Raskind 2000       | +                                           | +                                       | ?                                                         | ?                                               | +                                        | ?                                    | ?          |
| Reisberg 2003      | +                                           | ?                                       | ?                                                         | ?                                               | +                                        | ?                                    | ?          |
| Rockwood 2006      | +                                           | ?                                       | +                                                         | +                                               | +                                        | ?                                    | ?          |
| Rogers 1998a       | +                                           | ?                                       | ?                                                         | +                                               | +                                        | ?                                    | ?          |
| Rogers 1998b       | +                                           | ?                                       | ?                                                         | +                                               | +                                        | ?                                    | ?          |
| Rösler 1999        | +                                           | +                                       | +                                                         | +                                               | +                                        | ?                                    | ?          |
| Seltzer 2004       | +                                           | +                                       | ?                                                         | ?                                               | +                                        | ?                                    | ?          |
| Shao 2015          | ?                                           | ?                                       | ?                                                         | +                                               | ?                                        | ?                                    | +          |
| Tariot 2000        | +                                           | +                                       | ?                                                         | ?                                               | +                                        | ?                                    | +          |
| Tariot 2004        | +                                           | +                                       | ?                                                         | ?                                               | +                                        | ?                                    | ?          |
| van Dyck 2007      | ?                                           | +                                       | ?                                                         | ?                                               | +                                        | ?                                    | +          |
| Wang 2013          | ?                                           | ?                                       | ?                                                         | +                                               | +                                        | ?                                    | +          |
| Wilcock 2000       | +                                           | +                                       | ?                                                         | ?                                               | +                                        | +                                    | ?          |
| Wilkinson 2001     | +                                           | +                                       | ?                                                         | ?                                               | +                                        | +                                    | ?          |
| Winblad 2006       | +                                           | +                                       | +                                                         | +                                               | +                                        | ?                                    | ?          |
| Winblad 2007       | +                                           | ?                                       | ?                                                         | ?                                               | +                                        | +                                    | ?          |
| Zhang 2015         | ?                                           | +                                       | ?                                                         | +                                               | +                                        | ?                                    | ?          |
| Zhang 2016         | +                                           | +                                       | +                                                         | ?                                               | +                                        | ?                                    | ?          |



**Risk of bias graph: review authors' judgements about each risk of bias item presented as percentages across all included studies.**

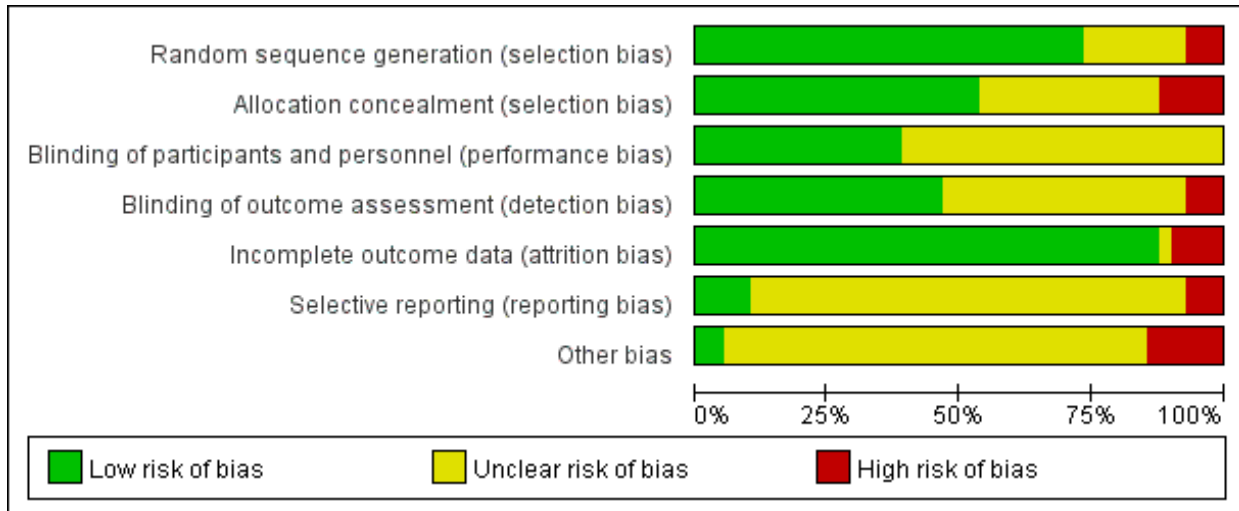

**Supplementary 5:  
Results from pair-wise meta-analysis for each outcome**

**Primary outcomes**

**Pair-wise meta-analysis for mild to moderate AD**

| Direct comparisons                       | Mean overall change of cognition<br>SMD (95% CI) | All-cause adverse events<br>OR (95% CI) |
|------------------------------------------|--------------------------------------------------|-----------------------------------------|
| Donepezil 5 mg vs                        |                                                  |                                         |
| Donepezil 10 mg                          | <u>0.165 (0.043 to 0.288)</u>                    | <u>0.593 (0.425 to 0.829)</u>           |
| Placebo                                  | <u>-0.380 (-0.500 to -0.259)</u>                 | 1.269 (0.851 to 1.893)                  |
| Donepezil 10 mg vs                       |                                                  |                                         |
| Placebo                                  | <u>-0.394(-0.560 to -0.227)</u>                  | <u>1.431 (1.052 to 1.947)</u>           |
| Galantamine 24 mg vs                     |                                                  |                                         |
| Galantamine 32 mg                        | -0.016 (-0.152 to 0.120)                         | 0.705 (0.454 to 1.094)                  |
| Placebo                                  | <u>-0.511 (-0.596 to -0.426)</u>                 | <u>1.586 (1.277 to 2.050)</u>           |
| Galantamine 32 mg vs                     |                                                  |                                         |
| Placebo                                  | <u>-0.527 (-0.665 to -0.389)</u>                 | <u>2.773 (1.861 to 4.132)</u>           |
| Rivastigmine 12 mg vs                    |                                                  |                                         |
| Rivastigmine patch 10 cm <sup>2</sup>    | -0.016 (-0.142 to 0.110)                         | <u>1.602 (1.258 to 2.040)</u>           |
| Placebo                                  | <u>-0.296 (-0.409 to -0.182)</u>                 | <u>2.873 (1.839 to 4.488)</u>           |
| Rivastigmine patch 10 cm <sup>2</sup> vs |                                                  |                                         |
| Placebo                                  | <u>-0.240 (-0.360 to -0.119)</u>                 | 1.442(0.953 to 2.183)                   |
| Rivastigmine patch 15 cm <sup>2</sup>    | 0.098 (-0.072 to 0.268)                          | 0.715(0.495 to 1.033)                   |
| Rivastigmine patch 5 cm <sup>2</sup>     | -0.080 (-0.250 to 0.090)                         | 1.021(0.633 to 1.646)                   |
| Rivastigmine patch 5 cm <sup>2</sup> vs  |                                                  |                                         |
| Placebo                                  | -0.160 (-0.330 to 0.011)                         | <u>1.796(1.159 to 2.783)</u>            |
| Memantine 20 mg vs                       |                                                  |                                         |
| Donepezil 10 mg                          | -0.037 (-0.341 to 0.268)                         | NA                                      |
| Placebo                                  | <u>-0.188 (-0.331 to -0.045)</u>                 | 1.018(0.761 to 1.361)                   |

### Pair-wise meta-analysis for moderate to severe AD

| Direct comparisons                 | Mean overall change of cognition<br>SMD (95% CI) | All-cause adverse events<br>OR (95% CI) |
|------------------------------------|--------------------------------------------------|-----------------------------------------|
| Donepezil 10 mg vs                 |                                                  |                                         |
| Placebo                            | <u>0.548 (0.374 to 0.721)</u>                    | <u>1.527 (1.139 to 2.047)</u>           |
| Donepezil 23 mg                    | -0.082 (-0.228 to 0.063)                         | <u>0.608 (0.493 to 0.749)</u>           |
| Memantine 20 mg + Donepezil 10 mg  | -0.231(-0.544 to 0.082)                          | 0.721(0.458 to 1.136)                   |
| Memantine 20 mg                    | 0.219 (-0.165 to 0.603)                          | NA                                      |
| Memantine 20 mg vs                 |                                                  |                                         |
| Placebo                            | <u>0.358 (0.049 to 0.668)</u>                    | 1.052(0.779 to 1.421)                   |
| Memantine 20mg + Donepezil 10mg    | -0.265 (-0.643 to 0.113)                         | NA                                      |
| Memantine 20mg + Donepezil 10mg vs |                                                  |                                         |
| Placebo                            | <u>0.722 (0.341 to 1.103)</u>                    | NA                                      |

### Secondary outcomes

#### Pair-wise meta-analysis on function

| Direct comparisons                    | Mean overall change of function<br>SMD (95% CI) |
|---------------------------------------|-------------------------------------------------|
| Donepezil 10 mg vs                    |                                                 |
| Placebo                               | <u>0.210 (0.074 to 0.345)</u>                   |
| Memantine 20 mg                       | 0.046 (-0.192 to 0.285)                         |
| Memantine 20 mg +Donepezil 10 mg      | -0.169(-0.343 to 0.006)                         |
| Rivastigmine 12 mg                    | -0.107 (-0.236 to 0.022)                        |
| Memantine 20 mg vs                    |                                                 |
| Placebo                               | 0.110 (-0.012 to 0.232)                         |
| Memantine 20 mg +Donepezil 10 mg      | -0.107 (-0.462 to 0.248)                        |
| Memantine 20 mg +Donepezil 10 mg vs   |                                                 |
| Placebo                               | <u>0.510 (0.135 to 0.885)</u>                   |
| Galantamine 24 mg vs                  |                                                 |
| Placebo                               | <u>0.212 (0.105 to 0.320)</u>                   |
| Rivastigmine 12 mg vs                 |                                                 |
| Placebo                               | 0.076 (-0.301 to 0.453)                         |
| Rivastigmine patch 10 cm <sup>2</sup> | -0.031 (-0.157 to 0.094)                        |

|                                                                                  |                                  |
|----------------------------------------------------------------------------------|----------------------------------|
| Rivastigmine patch 10 cm <sup>2</sup> vs<br>Placebo                              | <u>0.238(0.066 to 0.409)</u>     |
| Rivastigmine patch 15 cm <sup>2</sup>                                            | <u>-0.183 (-0.353 to -0.014)</u> |
| Rivastigmine patch 15 cm <sup>2</sup> vs<br>Rivastigmine patch 5 cm <sup>2</sup> | <u>0.138 (-0.016 to -0.292)</u>  |

---

#### Pair-wise meta-analysis on behavior

---

| Direct comparisons                                             | Mean overall change of behavior<br>SMD (95% CI) |
|----------------------------------------------------------------|-------------------------------------------------|
| Donepezil 10 mg vs<br>Placebo                                  | -0.159 (-0.349 to 0.032)                        |
| Memantine 20 mg                                                | 0.107 (-0.110 to 0.325)                         |
| Rivastigmine 12 mg                                             | 0.031(-0.096 to 0.158)                          |
| Memantine 20 mg vs<br>Placebo                                  | -0.041(-0.179 to 0.096)                         |
| Galantamine 24 mg vs<br>Placebo                                | <u>-0.154 (-0.277 to -0.030)</u>                |
| Rivastigmine 12 mg vs<br>Placebo                               | -0.039 (-0.209 to 0.131)                        |
| Rivastigmine 12 mg vs<br>Rivastigmine patch 10 cm <sup>2</sup> | -0.032 (-0.158 to 0.093)                        |

---

#### Pair-wise meta-analysis on global changes

---

| Direct comparisons              | Response rate of global changes<br>OR (95% CI) |
|---------------------------------|------------------------------------------------|
| Donepezil 5 mg vs<br>Placebo    | <u>2.120 (1.432 to 3.138)</u>                  |
| Donepezil 10 mg                 | 0.783 (0.608 to 1.009)                         |
| Donepezil 10 mg vs<br>Placebo   | <u>1.997 (1.623 to 2.457)</u>                  |
| Donepezil 23 mg                 | 1.166(0.639 to 2.129)                          |
| Galantamine 24 mg vs<br>Placebo | <u>1.236 (1.011 to 1.739)</u>                  |
| Galantamine 32 mg               | 0.925 (0.469 to 1.825)                         |

|                                                                                  |                               |
|----------------------------------------------------------------------------------|-------------------------------|
| Galantamine 32 mg vs<br>Placebo                                                  | 1.428 (0.981 to 2.079)        |
| Rivastigmine 12 mg vs<br>Placebo                                                 | <u>1.832 (1.399 to 2.399)</u> |
| Rivastigmine patch 10 cm <sup>2</sup>                                            | 1.070 (0.765 to 1.496)        |
| Rivastigmine patch 10 cm <sup>2</sup> vs<br>Rivastigmine patch 5 cm <sup>2</sup> | 1.040 (0.690 to 1.568)        |
| Placebo                                                                          | 1.304 (0.980 to 1.735)        |
| Rivastigmine patch 5 cm <sup>2</sup> vs<br>Rivastigmine patch 15 cm <sup>2</sup> | <u>0.592 (0.399 to 0.879)</u> |
| Placebo                                                                          | 1.482 (0.952 to 2.308)        |
| Memantine 20 mg vs<br>Placebo                                                    | 1.157(0.719 to 1.862)         |
| Memantine 20 mg + Donepezil 10 mg vs<br>Placebo                                  | 1.343(0.750 to 2.407)         |

#### Heterogeneity test, I<sup>2</sup> and heterogeneity estimate

#### Efficacy on cognition for mild to moderate AD

| Direct comparisons                                          | NO. of studies | P-value | I <sup>2</sup> | τ <sup>2</sup> |
|-------------------------------------------------------------|----------------|---------|----------------|----------------|
| Donepezil 5 mg vs Donepezil 10 mg                           | 3              | 0.328   | 10.3%          | 0.0012         |
| Donepezil 5 mg vs Placebo                                   | 4              | 0.289   | 20.2%          | 0.0031         |
| Donepezil 10 mg vs Placebo                                  | 6              | 0.026   | 60.8%          | 0.0253         |
| Galantamine 24 mg vs Galantamine 32 mg                      | 2              | 0.318   | 0.0%           | 0.0000         |
| Galantamine 24 mg vs Placebo                                | 6              | 0.615   | 0.0%           | 0.0000         |
| Galantamine 32 mg vs Placebo                                | 2              | 0.894   | 0.0%           | 0.0000         |
| Rivastigmine 12 mg vs Placebo                               | 3              | 0.287   | 19.8%          | 0.0020         |
| Rivastigmine 10 cm <sup>2</sup> vs Placebo                  | 2              | 0.971   | 0.0%           | 0.0000         |
| Memantine 20 mg vs Placebo                                  | 2              | 0.442   | 0.0%           | 0.0000         |
| Rivastigmine 12 mg vs Rivastigmine patch 10 cm <sup>2</sup> | 2              | 0.799   | 0.0%           | 0.0000         |

#### All-cause adverse events for mild to moderate AD

| Direct comparisons                     | NO. of studies | P-value | I <sup>2</sup> | τ <sup>2</sup> |
|----------------------------------------|----------------|---------|----------------|----------------|
| Donepezil 5 mg vs Donepezil 10 mg      | 2              | 0.836   | 0.0%           | 0.0000         |
| Donepezil 5 mg vs Placebo              | 3              | 0.109   | 54.8%          | 0.0683         |
| Donepezil 10 mg vs Placebo             | 5              | 0.225   | 29.5%          | 0.0362         |
| Galantamine 24 mg vs Galantamine 32 mg | 2              | 0.313   | 1.8%           | 0.0020         |
| Galantamine 24 mg vs Placebo           | 7              | 0.018   | 60.8%          | 0.0637         |
| Galantamine 32 mg vs Placebo           | 2              | 0.484   | 0.0%           | 0.0000         |

|                                                             |   |       |       |        |
|-------------------------------------------------------------|---|-------|-------|--------|
| Rivastigmine 12 mg vs Placebo                               | 3 | 0.063 | 63.9% | 0.0988 |
| Rivastigmine 10 cm <sup>2</sup> vs Placebo                  | 2 | 0.124 | 57.7% | 0.0524 |
| Memantine 20 mg vs Placebo                                  | 2 | 0.372 | 0.0%  | 0.0000 |
| Rivastigmine 12 mg vs Rivastigmine patch 10 cm <sup>2</sup> | 2 | 0.651 | 0.0%  | 0.0000 |

#### **Efficacy on cognition for moderate to severe AD**

| Direct comparisons                                      | NO. of studies | P-value | I <sup>2</sup> | τ <sup>2</sup> |
|---------------------------------------------------------|----------------|---------|----------------|----------------|
| Donepezil 10 mg vs Donepezil 23 mg                      | 2              | 0.2     | 39.1%          | 0.0049         |
| Donepezil 10 mg vs Placebo                              | 6              | 0.064   | 52%            | 0.0233         |
| Donepezil 10 mg vs<br>Memantine 20 mg + Donepezil 10 mg | 2              | 0.126   | 57.3%          | 0.039          |
| Memantine 20 mg vs Placebo                              | 4              | 0.021   | 69.3%          | 0.0617         |

#### **All-cause adverse events for moderate to severe AD**

| Direct comparisons                                      | NO. of studies | P-value | I <sup>2</sup> | τ <sup>2</sup> |
|---------------------------------------------------------|----------------|---------|----------------|----------------|
| Donepezil 10 mg vs Donepezil 23 mg                      | 2              | 0.612   | 0.0%           | 0.0000         |
| Donepezil 10 mg vs Placebo                              | 4              | 0.837   | 0.0%           | 0.0000         |
| Donepezil 10 mg vs<br>Memantine 20 mg + Donepezil 10 mg | 2              | 0.684   | 0.0%           | 0.0000         |
| Memantine 20 mg vs Placebo                              | 3              | 0.714   | 0.0%           | 0.0000         |

#### **Efficacy on function**

| Direct comparisons                                          | NO. of studies | P-value | I <sup>2</sup> | τ <sup>2</sup> |
|-------------------------------------------------------------|----------------|---------|----------------|----------------|
| Donepezil 10 mg vs Placebo                                  | 4              | 0.447   | 0.0%           | 0.0000         |
| Donepezil 10 mg vs Memantine 20 mg                          | 2              | 0.451   | 0.0%           | 0.0000         |
| Donepezil 10 mg vs<br>Memantine 20 mg + Donepezil 10 mg     | 2              | 0.548   | 0.0%           | 0.0000         |
| Memantine 20 mg vs Placebo                                  | 5              | 0.253   | 25.2%          | 0.0049         |
| Memantine 20 mg vs<br>Memantine 20 mg + Donepezil 10 mg     | 2              | 0.279   | 14.8%          | 0.0112         |
| Galantamine 24 mg vs Placebo                                | 3              | 0.461   | 0.0%           | 0.0000         |
| Rivastigmine 12 mg vs Placebo                               | 2              | 0.179   | 44.6%          | 0.0426         |
| Rivastigmine 12 mg vs Rivastigmine patch 10 cm <sup>2</sup> | 2              | 0.849   | 0.0%           | 0.0000         |

#### **Efficacy on behavior**

| Direct comparisons                                          | NO. of studies | P-value | I <sup>2</sup> | τ <sup>2</sup> |
|-------------------------------------------------------------|----------------|---------|----------------|----------------|
| Donepezil 10 mg vs Placebo                                  | 5              | 0.023   | 64.7%          | 0.0304         |
| Memantine 20 mg vs Placebo                                  | 6              | 0.159   | 37.1%          | 0.0090         |
| Galantamine 24 mg vs Placebo                                | 2              | 0.839   | 0.0%           | 0.0000         |
| Rivastigmine 12 mg vs Rivastigmine patch 10 cm <sup>2</sup> | 2              | 0.159   | 49.6%          | 0.0140         |

### Efficacy on global changes

| Direct comparisons                                          | NO. of studies | P-value | I <sup>2</sup> | τ <sup>2</sup> |
|-------------------------------------------------------------|----------------|---------|----------------|----------------|
| Donepezil 5 mg vs Placebo                                   | 5              | 0.037   | 60.7%          | 0.1208         |
| Donepezil 5 mg vs Donepezil 10 mg                           | 4              | 0.350   | 8.7%           | 0.0059         |
| Donepezil 10 mg vs Placebo                                  | 7              | 0.450   | 0.0%           | 0.0000         |
| Donepezil 10 mg vs Donepezil 23 mg                          | 2              | 0.058   | 72.3%          | 0.1409         |
| Galantamine 24 mg vs Placebo                                | 5              | 0.176   | 36.8%          | 0.0346         |
| Galantamine 24 mg vs Galantamine 32 mg                      | 2              | 0.063   | 71.1%          | 0.1712         |
| Galantamine 32 mg vs Placebo                                | 2              | 0.381   | 0.0%           | 0.0000         |
| Rivastigmine 12 mg vs Placebo                               | 3              | 0.273   | 23.0%          | 0.0132         |
| Rivastigmine patch 10 cm <sup>2</sup> vs Placebo            | 2              | 0.328   | 0.0%           | 0.0000         |
| Rivastigmine 12 mg vs Rivastigmine patch 10 cm <sup>2</sup> | 2              | 0.203   | 38.4%          | 0.0224         |

### Publication bias assessed by Egger's test

#### Efficacy on cognition for mild to moderate AD

| Std_Eff | Coef.     | Std. Err. | t    | Pt    | [95% Conf. Interval] |           |
|---------|-----------|-----------|------|-------|----------------------|-----------|
| slope   | 0.1787227 | 0.166841  | 1.07 | 0.292 | -0.1603391           | 0.5177845 |
| bias    | 0.9610271 | 1.637752  | 0.59 | 0.561 | -2.367286            | 4.28934   |

#### All-cause adverse events for mild to moderate AD

| Std_Eff | Coef.      | Std. Err. | t     | Pt    | [95% Conf. Interval] |           |
|---------|------------|-----------|-------|-------|----------------------|-----------|
| slope   | -0.0971094 | 0.2432059 | -0.40 | 0.692 | -0.593131            | 0.3989122 |
| bias    | 1.568515   | 1.133214  | 1.38  | 0.176 | -0.7426903           | 3.87972   |

#### Efficacy on cognition for moderate to severe AD

| Std_Eff | Coef.     | Std. Err. | t    | Pt    | [95% Conf. Interval] |          |
|---------|-----------|-----------|------|-------|----------------------|----------|
| slope   | 0.0447009 | 0.1340018 | 0.33 | 0.743 | -0.2409172           | 0.330319 |
| bias    | 2.066903  | 1.058127  | 1.95 | 0.070 | -0.1884426           | 4.322248 |

#### All-cause adverse events for moderate to severe AD

| Std_Eff | Coef.     | Std. Err. | t     | Pt    | [95% Conf. Interval] |          |
|---------|-----------|-----------|-------|-------|----------------------|----------|
| slope   | 1.693871  | 0.3442733 | 4.92  | 0.001 | 0.8999752            | 2.487766 |
| bias    | -1.643118 | 1.516087  | -1.08 | 0.310 | -5.13922             | 1.852985 |

**Efficacy on function**

| Std_Eff | Coef.     | Std. Err. | t    | Pt    | [95% Conf. Interval] |           |
|---------|-----------|-----------|------|-------|----------------------|-----------|
| slope   | 0.0535554 | 0.0987051 | 0.54 | 0.593 | -0.1523397           | 0.2594506 |
| bias    | 0.2191142 | 1.019427  | 0.21 | 0.832 | -1.907374            | 2.345602  |

**Efficacy on behavior**

| Std_Eff | Coef.     | Std. Err. | t     | Pt    | [95% Conf. Interval] |           |
|---------|-----------|-----------|-------|-------|----------------------|-----------|
| slope   | 0.1495432 | 0.1390142 | 1.08  | 0.298 | -0.1451537           | 0.4442401 |
| bias    | -2.131178 | 1.369578  | -1.56 | 0.139 | -5.034553            | 0.7721966 |

**Efficacy on global changes**

| Std_Eff | Coef.      | Std. Err. | t     | Pt    | [95% Conf. Interval] |           |
|---------|------------|-----------|-------|-------|----------------------|-----------|
| slope   | 0.0959715  | 0.3798246 | 0.25  | 0.802 | -0.6743485           | 0.8662916 |
| bias    | -0.0390849 | 1.613679  | -0.02 | 0.981 | -3.311779            | 3.233609  |



**Supplementary 6:  
Results from network meta-analysis for each outcome**

|                               |                               |                               |                                  |                               |
|-------------------------------|-------------------------------|-------------------------------|----------------------------------|-------------------------------|
| <b>DON 10 mg</b>              | <u>0.61</u><br>(0.43 to 0.83) | 1.52<br>(0.90 to 2.42)        | <u>0.75</u><br>(0.40 to 1.28)    | <u>1.56</u><br>(1.09 to 2.17) |
| -0.06<br>(-0.39 to 0.27)      | <b>DON 23 mg</b>              | <u>2.56</u><br>(1.35 to 4.50) | 1.27<br>(0.62 to 2.34)           | <u>2.63</u><br>(1.59-4.14)    |
| 0.19<br>(-0.14 to 0.50)       | 0.25<br>(-0.22 to 0.70)       | <b>MEM 20 mg</b>              | 0.53<br>(0.23 to 1.04)           | 1.06<br>(0.72 to 1.49)        |
| -0.22<br>(-0.55 to 0.13)      | -0.16<br>(-0.63 to 0.32)      | -0.41<br>(-0.81 to 0.01)      | <b>MEM 20 mg +<br/>DON 10 mg</b> | <u>2.27</u><br>(1.10 to 4.19) |
| <u>0.53</u><br>(0.33 to 0.75) | <u>0.60</u><br>(0.21 to 0.99) | <u>0.34</u><br>(0.08 to 0.63) | <u>0.76</u><br>(0.39 to 1.11)    | <b>PBO</b>                    |

■ Treatment ■ Efficacy (SMD & 95% CrI) ■ Tolerability (OR & 95 % CrI)

**Comparative efficacy and tolerability for moderate to severe AD in the network meta-analysis.**

Comparisons should be read from left to right. The efficacy and tolerability estimate is located at the intersection of the column-defining treatment and the row-defining treatment. For efficacy, an SMD above 0 favors the column-defining treatment. For tolerability, an OR below 1 favors the row-defining treatment. Significant results are in bold and underlined. PBO = placebo; DON = donepezil; GAL = galantamine; RIV = rivastigmine; MEM = memantine; SMD = standardized mean difference; OR = odds ratios; CrI = credible intervals.

**Efficacy on function**

| NO. | Interventions                        |
|-----|--------------------------------------|
| 1   | Placebo                              |
| 2   | Donepezil 10 mg                      |
| 3   | Galantamine 24 mg                    |
| 4   | Rivastigmine 12 mg                   |
| 5   | Rivastigmine patch 10cm <sup>2</sup> |
| 6   | Rivastigmine patch 15cm <sup>2</sup> |
| 7   | Rivastigmine patch 5cm <sup>2</sup>  |
| 8   | Memantine 20 mg                      |
| 9   | Memantine 20 mg +Donepezil 10 mg     |

| node     | SMD      | sd      | MC error | 2.50%    | median   | 97.50%  | start | sample |
|----------|----------|---------|----------|----------|----------|---------|-------|--------|
| SMD[1,2] | 0.1485   | 0.05998 | 7.21E-04 | 0.03024  | 0.1488   | 0.2673  | 50001 | 300000 |
| SMD[1,3] | 0.2105   | 0.06478 | 5.76E-04 | 0.08127  | 0.21     | 0.3379  | 50001 | 300000 |
| SMD[1,4] | 0.2121   | 0.07268 | 7.72E-04 | 0.06431  | 0.214    | 0.3526  | 50001 | 300000 |
| SMD[1,5] | 0.2388   | 0.08596 | 9.13E-04 | 0.06725  | 0.24     | 0.4077  | 50001 | 300000 |
| SMD[1,6] | 0.4234   | 0.1374  | 0.001698 | 0.1479   | 0.4249   | 0.6895  | 50001 | 300000 |
| SMD[1,7] | 0.2836   | 0.1691  | 0.001974 | -0.05428 | 0.2853   | 0.6136  | 50001 | 300000 |
| SMD[1,8] | 0.1151   | 0.05607 | 6.12E-04 | 0.006824 | 0.1138   | 0.228   | 50001 | 300000 |
| SMD[1,9] | 0.3158   | 0.1016  | 0.001373 | 0.1185   | 0.3146   | 0.5161  | 50001 | 300000 |
| SMD[2,3] | 0.06206  | 0.08823 | 9.08E-04 | -0.1136  | 0.06264  | 0.2329  | 50001 | 300000 |
| SMD[2,4] | 0.06366  | 0.07201 | 7.12E-04 | -0.08651 | 0.0662   | 0.1979  | 50001 | 300000 |
| SMD[2,5] | 0.09033  | 0.09222 | 9.40E-04 | -0.09567 | 0.09159  | 0.2702  | 50001 | 300000 |
| SMD[2,6] | 0.2749   | 0.1419  | 0.00171  | -0.01044 | 0.277    | 0.5468  | 50001 | 300000 |
| SMD[2,7] | 0.1352   | 0.1729  | 0.001971 | -0.2112  | 0.1373   | 0.4687  | 50001 | 300000 |
| SMD[2,8] | -0.03341 | 0.07277 | 8.78E-04 | -0.1758  | -0.03375 | 0.1096  | 50001 | 300000 |
| SMD[2,9] | 0.1673   | 0.09305 | 0.001216 | -0.01567 | 0.1668   | 0.3507  | 50001 | 300000 |
| SMD[3,4] | 0.001597 | 0.09706 | 9.48E-04 | -0.1925  | 0.002986 | 0.1889  | 50001 | 300000 |
| SMD[3,5] | 0.02827  | 0.1072  | 0.001072 | -0.184   | 0.02916  | 0.2399  | 50001 | 300000 |
| SMD[3,6] | 0.2129   | 0.1516  | 0.001809 | -0.08953 | 0.2151   | 0.5086  | 50001 | 300000 |
| SMD[3,7] | 0.07312  | 0.1809  | 0.002089 | -0.286   | 0.075    | 0.4288  | 50001 | 300000 |
| SMD[3,8] | -0.09547 | 0.08589 | 8.28E-04 | -0.2606  | -0.09699 | 0.07861 | 50001 | 300000 |
| SMD[3,9] | 0.1053   | 0.1205  | 0.001472 | -0.1286  | 0.1052   | 0.3456  | 50001 | 300000 |
| SMD[4,5] | 0.02667  | 0.07351 | 7.00E-04 | -0.1157  | 0.02564  | 0.1734  | 50001 | 300000 |
| SMD[4,6] | 0.2113   | 0.1296  | 0.001471 | -0.04172 | 0.2105   | 0.4689  | 50001 | 300000 |
| SMD[4,7] | 0.07152  | 0.1629  | 0.001772 | -0.2497  | 0.07164  | 0.3947  | 50001 | 300000 |
| SMD[4,8] | -0.09707 | 0.08821 | 9.63E-04 | -0.2632  | -0.09863 | 0.0838  | 50001 | 300000 |
| SMD[4,9] | 0.1037   | 0.1124  | 0.001353 | -0.1139  | 0.1033   | 0.3276  | 50001 | 300000 |
| SMD[5,6] | 0.1846   | 0.1068  | 0.001154 | -0.02657 | 0.1857   | 0.3941  | 50001 | 300000 |
| SMD[5,7] | 0.04485  | 0.1459  | 0.001525 | -0.2447  | 0.04581  | 0.3336  | 50001 | 300000 |
| SMD[5,8] | -0.1237  | 0.1006  | 0.001083 | -0.3168  | -0.1262  | 0.08063 | 50001 | 300000 |
| SMD[5,9] | 0.077    | 0.1254  | 0.001505 | -0.1633  | 0.07616  | 0.3231  | 50001 | 300000 |

|          |         |         |          |          |         |          |       |        |
|----------|---------|---------|----------|----------|---------|----------|-------|--------|
| SMD[6,7] | -0.1397 | 0.09953 | 8.16E-04 | -0.3344  | -0.1402 | 0.05604  | 50001 | 300000 |
| SMD[6,8] | -0.3083 | 0.1471  | 0.001815 | -0.5896  | -0.3105 | -0.01227 | 50001 | 300000 |
| SMD[6,9] | -0.1076 | 0.1657  | 0.002076 | -0.4322  | -0.1108 | 0.2208   | 50001 | 300000 |
| SMD[7,8] | -0.1686 | 0.177   | 0.002065 | -0.5121  | -0.1713 | 0.1862   | 50001 | 300000 |
| SMD[7,9] | 0.03215 | 0.192   | 0.002265 | -0.3415  | 0.0301  | 0.4168   | 50001 | 300000 |
| SMD[8,9] | 0.2007  | 0.1059  | 0.00146  | -0.00772 | 0.2022  | 0.4067   | 50001 | 300000 |

### Efficacy on behavior

| NO. | Interventions                        |
|-----|--------------------------------------|
| 1   | Placebo                              |
| 2   | Donepezil 10 mg                      |
| 3   | Galantamine 24 mg                    |
| 4   | Rivastigmine 12 mg                   |
| 5   | Rivastigmine patch 10cm <sup>2</sup> |
| 6   | Memantine 20 mg                      |

| node     | mean     | sd      | MC error | 2.50%   | median   | 97.50%  | start | sample |
|----------|----------|---------|----------|---------|----------|---------|-------|--------|
| SMD[1,2] | -0.09703 | 0.07445 | 3.12E-04 | -0.2462 | -0.09676 | 0.05082 | 50001 | 300000 |
| SMD[1,3] | -0.1536  | 0.117   | 4.01E-04 | -0.3884 | -0.1534  | 0.08201 | 50001 | 300000 |
| SMD[1,4] | -0.08403 | 0.1156  | 3.68E-04 | -0.3158 | -0.08455 | 0.1516  | 50001 | 300000 |
| SMD[1,5] | -0.03919 | 0.1363  | 4.76E-04 | -0.3122 | -0.03988 | 0.2374  | 50001 | 300000 |
| SMD[1,6] | -0.07981 | 0.07558 | 3.55E-04 | -0.2354 | -0.07817 | 0.06634 | 50001 | 300000 |
| SMD[2,3] | -0.05653 | 0.1385  | 5.15E-04 | -0.3337 | -0.05722 | 0.2228  | 50001 | 300000 |
| SMD[2,4] | 0.013    | 0.1155  | 3.51E-04 | -0.2187 | 0.01168  | 0.25    | 50001 | 300000 |
| SMD[2,5] | 0.05784  | 0.1419  | 4.99E-04 | -0.2263 | 0.05733  | 0.3472  | 50001 | 300000 |
| SMD[2,6] | 0.01723  | 0.09894 | 4.55E-04 | -0.1842 | 0.01891  | 0.21    | 50001 | 300000 |
| SMD[3,4] | 0.06953  | 0.164   | 5.48E-04 | -0.2609 | 0.06945  | 0.4013  | 50001 | 300000 |
| SMD[3,5] | 0.1144   | 0.1793  | 6.30E-04 | -0.2463 | 0.1142   | 0.4766  | 50001 | 300000 |
| SMD[3,6] | 0.07376  | 0.1392  | 5.30E-04 | -0.2108 | 0.07559  | 0.347   | 50001 | 300000 |
| SMD[4,5] | 0.04484  | 0.1131  | 3.88E-04 | -0.1836 | 0.04513  | 0.2726  | 50001 | 300000 |
| SMD[4,6] | 0.004227 | 0.136   | 5.20E-04 | -0.2767 | 0.006938 | 0.2703  | 50001 | 300000 |
| SMD[5,6] | -0.04062 | 0.1545  | 5.87E-04 | -0.358  | -0.03745 | 0.2632  | 50001 | 300000 |

### Efficacy on global changes

| NO. | Interventions                        |
|-----|--------------------------------------|
| 1   | Placebo                              |
| 2   | Donepezil 5 mg                       |
| 3   | Donepezil 10 mg                      |
| 4   | Galantamine 24 mg                    |
| 5   | Galantamine 32 mg                    |
| 6   | Rivastigmine 12 mg                   |
| 7   | Rivastigmine patch 10cm <sup>2</sup> |
| 8   | Rivastigmine patch 5cm <sup>2</sup>  |
| 9   | Rivastigmine patch 15cm <sup>2</sup> |
| 10  | Memantine 20 mg                      |
| 11  | Donepezil 23 mg                      |

| node     | mean   | sd     | MC error | 2.50%  | median | 97.50% | start | sample |
|----------|--------|--------|----------|--------|--------|--------|-------|--------|
| or[1,2]  | 1.975  | 0.3152 | 0.001571 | 1.428  | 1.95   | 2.671  | 50001 | 300000 |
| or[1,3]  | 2.146  | 0.3052 | 0.001577 | 1.608  | 2.124  | 2.806  | 50001 | 300000 |
| or[1,4]  | 1.34   | 0.2142 | 0.001047 | 0.9606 | 1.325  | 1.807  | 50001 | 300000 |
| or[1,5]  | 1.477  | 0.3569 | 0.001787 | 0.8897 | 1.44   | 2.285  | 50001 | 300000 |
| or[1,6]  | 1.803  | 0.319  | 0.001142 | 1.258  | 1.774  | 2.517  | 50001 | 300000 |
| or[1,7]  | 1.568  | 0.3145 | 0.001232 | 1.041  | 1.537  | 2.279  | 50001 | 300000 |
| or[1,8]  | 1.551  | 0.4901 | 0.002567 | 0.8098 | 1.481  | 2.712  | 50001 | 300000 |
| or[1,9]  | 2.765  | 1.344  | 0.006555 | 1.04   | 2.503  | 6.061  | 50001 | 300000 |
| or[1,10] | 1.24   | 0.4574 | 0.002016 | 0.586  | 1.164  | 2.337  | 50001 | 300000 |
| or[1,11] | 1.991  | 0.545  | 0.002799 | 1.097  | 1.935  | 3.22   | 50001 | 300000 |
| or[2,3]  | 1.103  | 0.1805 | 8.69E-04 | 0.7874 | 1.09   | 1.498  | 50001 | 300000 |
| or[2,4]  | 0.6956 | 0.1579 | 7.66E-04 | 0.4321 | 0.6798 | 1.052  | 50001 | 300000 |
| or[2,5]  | 0.7667 | 0.2236 | 0.00108  | 0.4141 | 0.7393 | 1.282  | 50001 | 300000 |
| or[2,6]  | 0.9355 | 0.2245 | 9.54E-04 | 0.571  | 0.9099 | 1.451  | 50001 | 300000 |
| or[2,7]  | 0.8137 | 0.2101 | 8.98E-04 | 0.4768 | 0.7883 | 1.3    | 50001 | 300000 |
| or[2,8]  | 0.8051 | 0.2888 | 0.001442 | 0.3831 | 0.7599 | 1.497  | 50001 | 300000 |
| or[2,9]  | 1.435  | 0.746  | 0.003515 | 0.5036 | 1.283  | 3.264  | 50001 | 300000 |
| or[2,10] | 0.6431 | 0.2614 | 0.001177 | 0.2819 | 0.5968 | 1.277  | 50001 | 300000 |
| or[2,11] | 1.024  | 0.2931 | 0.001407 | 0.5486 | 0.9931 | 1.69   | 50001 | 300000 |
| or[3,4]  | 0.6371 | 0.1373 | 6.72E-04 | 0.4063 | 0.6236 | 0.9454 | 50001 | 300000 |
| or[3,5]  | 0.7022 | 0.1984 | 9.10E-04 | 0.3877 | 0.6777 | 1.16   | 50001 | 300000 |
| or[3,6]  | 0.8569 | 0.1965 | 8.30E-04 | 0.537  | 0.8349 | 1.305  | 50001 | 300000 |
| or[3,7]  | 0.7454 | 0.1849 | 7.93E-04 | 0.4483 | 0.7235 | 1.172  | 50001 | 300000 |
| or[3,8]  | 0.7375 | 0.2584 | 0.001341 | 0.3583 | 0.6972 | 1.355  | 50001 | 300000 |
| or[3,9]  | 1.314  | 0.6752 | 0.003253 | 0.4679 | 1.179  | 2.977  | 50001 | 300000 |
| or[3,10] | 0.5894 | 0.2366 | 0.001101 | 0.262  | 0.5483 | 1.16   | 50001 | 300000 |
| or[3,11] | 0.9277 | 0.2147 | 8.97E-04 | 0.557  | 0.9122 | 1.399  | 50001 | 300000 |
| or[4,5]  | 1.116  | 0.2678 | 0.001271 | 0.6793 | 1.086  | 1.725  | 50001 | 300000 |

|           |        |        |          |        |        |       |       |        |
|-----------|--------|--------|----------|--------|--------|-------|-------|--------|
| or[4,6]   | 1.38   | 0.336  | 0.001429 | 0.845  | 1.338  | 2.158 | 50001 | 300000 |
| or[4,7]   | 1.2    | 0.3148 | 0.001353 | 0.708  | 1.16   | 1.932 | 50001 | 300000 |
| or[4,8]   | 1.188  | 0.4308 | 0.002174 | 0.5691 | 1.116  | 2.231 | 50001 | 300000 |
| or[4,9]   | 2.117  | 1.112  | 0.005399 | 0.7484 | 1.885  | 4.862 | 50001 | 300000 |
| or[4,10]  | 0.9493 | 0.3916 | 0.001779 | 0.4145 | 0.8785 | 1.9   | 50001 | 300000 |
| or[4,11]  | 1.523  | 0.4893 | 0.002394 | 0.7658 | 1.458  | 2.663 | 50001 | 300000 |
| or[5,6]   | 1.292  | 0.3991 | 0.001824 | 0.6935 | 1.231  | 2.241 | 50001 | 300000 |
| or[5,7]   | 1.124  | 0.3645 | 0.001679 | 0.5851 | 1.068  | 1.991 | 50001 | 300000 |
| or[5,8]   | 1.112  | 0.4604 | 0.002269 | 0.4841 | 1.027  | 2.235 | 50001 | 300000 |
| or[5,9]   | 1.982  | 1.129  | 0.005265 | 0.6474 | 1.737  | 4.777 | 50001 | 300000 |
| or[5,10]  | 0.8888 | 0.4072 | 0.00189  | 0.355  | 0.8106 | 1.89  | 50001 | 300000 |
| or[5,11]  | 1.425  | 0.531  | 0.002394 | 0.6475 | 1.344  | 2.697 | 50001 | 300000 |
| or[6,7]   | 0.8826 | 0.1736 | 6.58E-04 | 0.5878 | 0.8665 | 1.271 | 50001 | 300000 |
| or[6,8]   | 0.8796 | 0.2987 | 0.001455 | 0.4364 | 0.8343 | 1.593 | 50001 | 300000 |
| or[6,9]   | 1.568  | 0.7929 | 0.0037   | 0.5668 | 1.408  | 3.518 | 50001 | 300000 |
| or[6,10]  | 0.7088 | 0.2953 | 0.001258 | 0.3043 | 0.6564 | 1.423 | 50001 | 300000 |
| or[6,11]  | 1.138  | 0.3751 | 0.001724 | 0.5565 | 1.09   | 2.012 | 50001 | 300000 |
| or[7,8]   | 1.007  | 0.3134 | 0.001493 | 0.5301 | 0.9634 | 1.748 | 50001 | 300000 |
| or[7,9]   | 1.795  | 0.8664 | 0.003924 | 0.6747 | 1.627  | 3.928 | 50001 | 300000 |
| or[7,10]  | 0.8218 | 0.353  | 0.001509 | 0.3439 | 0.7579 | 1.679 | 50001 | 300000 |
| or[7,11]  | 1.32   | 0.4532 | 0.002086 | 0.6261 | 1.258  | 2.38  | 50001 | 300000 |
| or[8,9]   | 1.781  | 0.6019 | 0.002152 | 0.893  | 1.69   | 3.22  | 50001 | 300000 |
| or[8,10]  | 0.877  | 0.4451 | 0.002068 | 0.3163 | 0.7847 | 1.98  | 50001 | 300000 |
| or[8,11]  | 1.408  | 0.6075 | 0.003089 | 0.5634 | 1.307  | 2.852 | 50001 | 300000 |
| or[9,10]  | 0.5469 | 0.3583 | 0.001632 | 0.1519 | 0.4639 | 1.423 | 50001 | 300000 |
| or[9,11]  | 0.8774 | 0.5066 | 0.002381 | 0.2675 | 0.772  | 2.108 | 50001 | 300000 |
| or[10,11] | 1.816  | 0.853  | 0.004579 | 0.6688 | 1.659  | 3.876 | 50001 | 300000 |

**Supplementary 7:  
Network plot for each outcome**

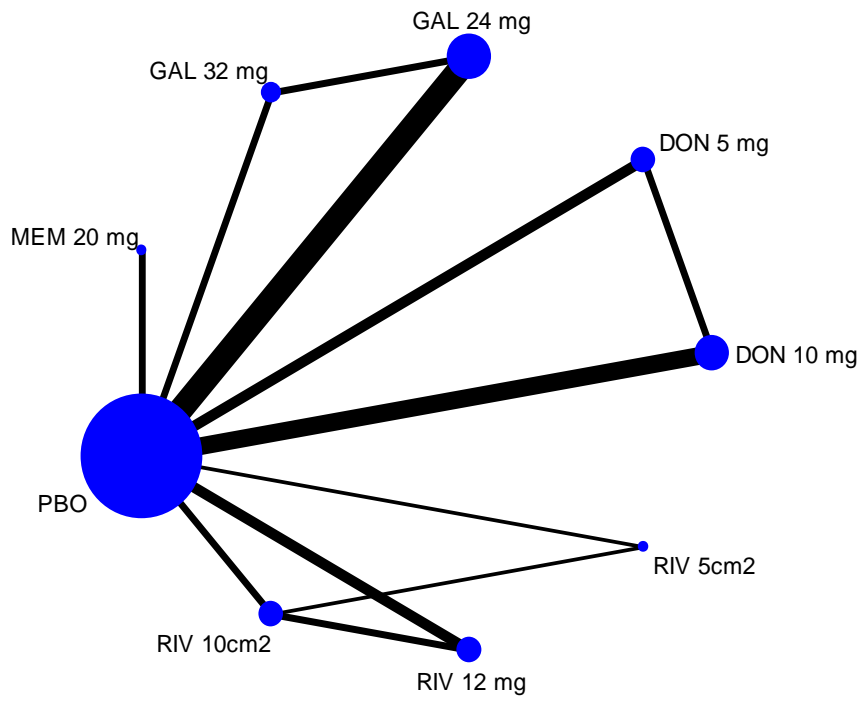

**Network plot of tolerability for mild to moderate AD**

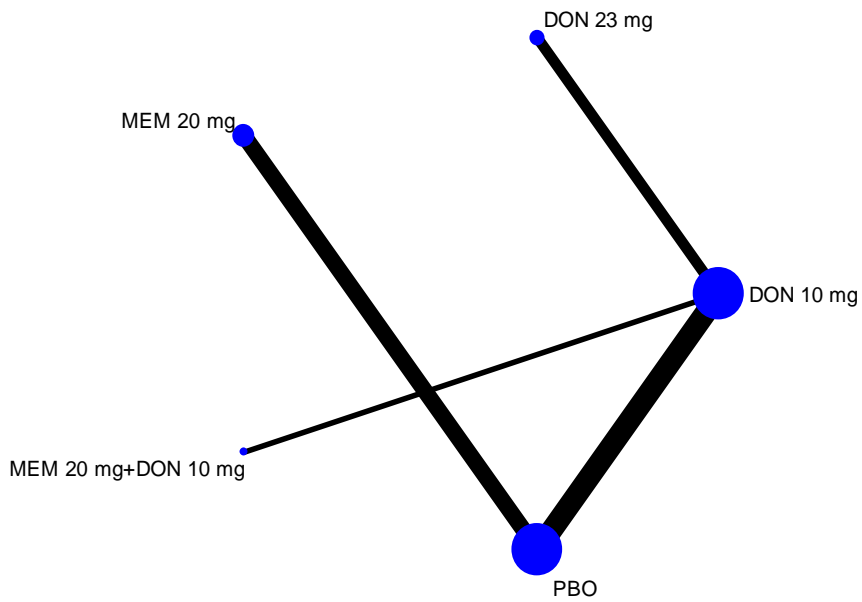

**Network plot of tolerability for moderate to severe AD**

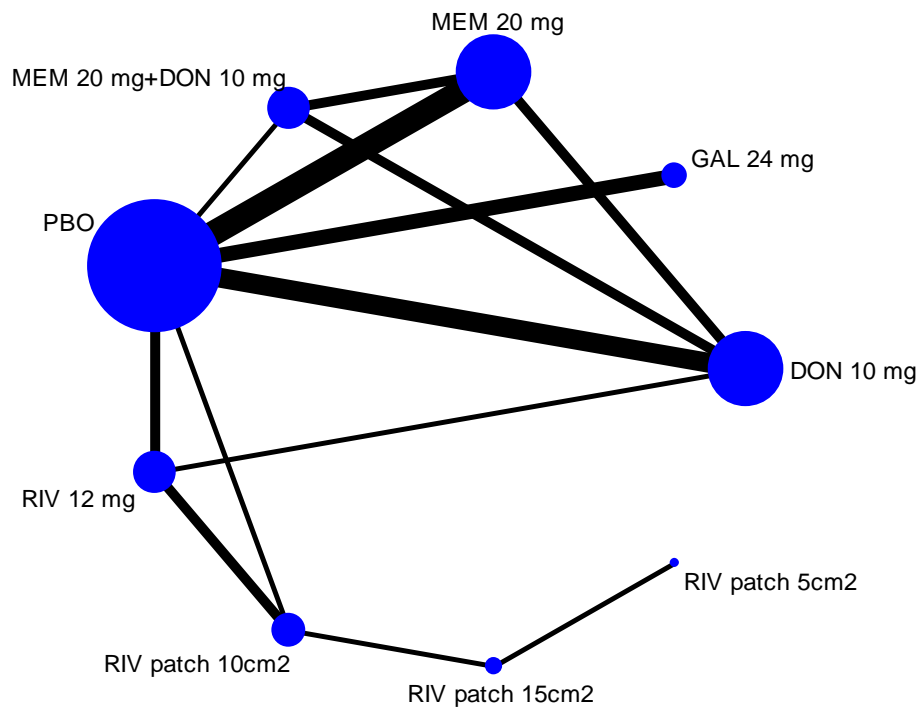

**Network plot of efficacy on function**

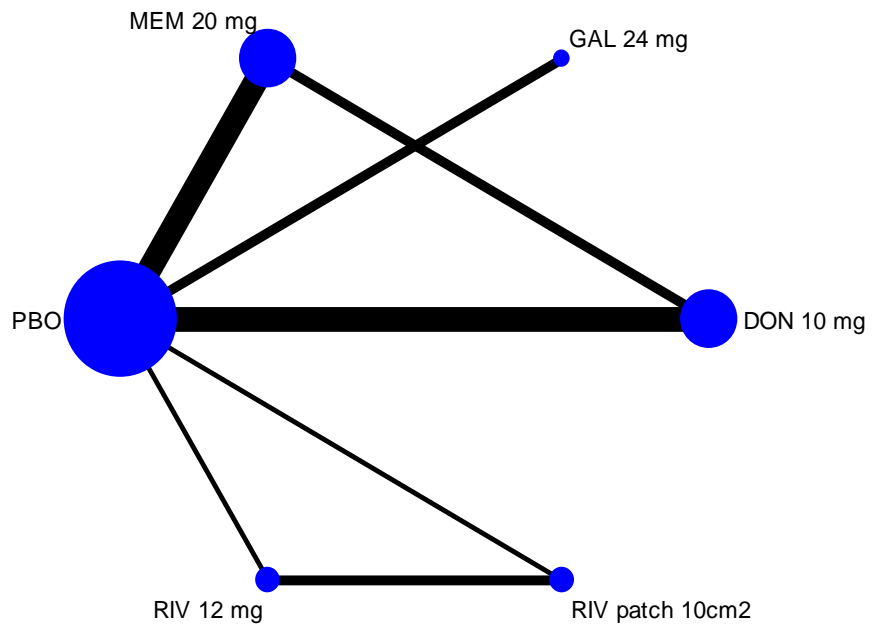

**Network plot of efficacy on behavior**

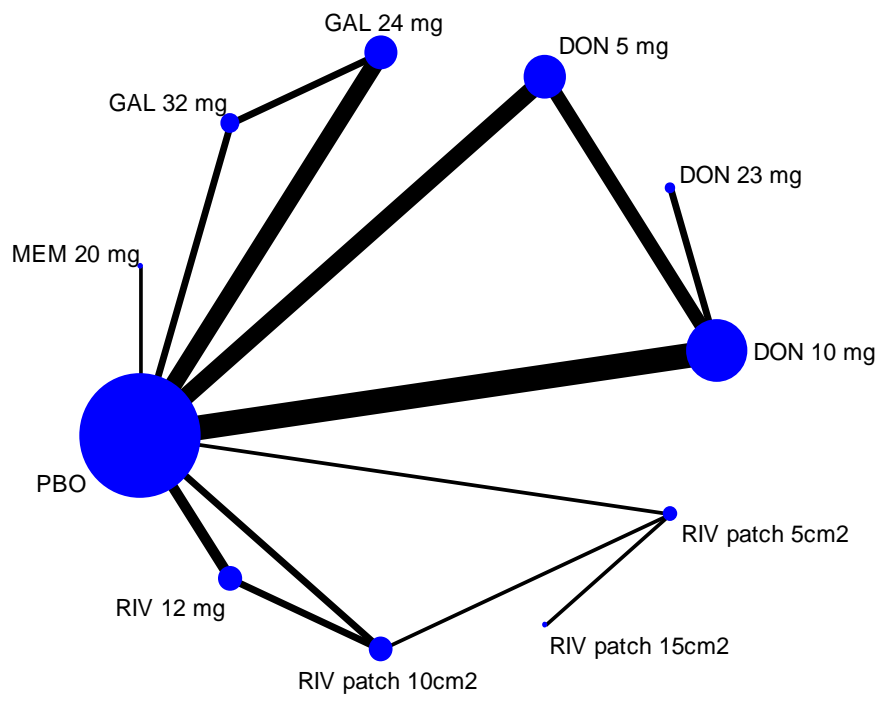

**Network plot of efficacy on global changes**



**Supplementary 8:  
Treatment ranking and rankograms for each outcome**

**Efficacy on cognition for mild to moderate AD**

**Treatment ranking**

| Treatment                             | Abbreviation           | SUCRA(%) | PrBest | MeanRank |
|---------------------------------------|------------------------|----------|--------|----------|
| Placebo                               | PBO                    | 0.6      | 0.0    | 9.9      |
| Donepezil 5 mg                        | DON 5 mg               | 53.2     | 0.4    | 5.2      |
| Donepezil 10 mg                       | DON 10 mg              | 72.8     | 3.5    | 3.5      |
| Galantamine 24 mg                     | GAL 24 mg              | 90.9     | 37.3   | 1.8      |
| Galantamine 32 mg                     | GAL 32 mg              | 91.1     | 49.5   | 1.8      |
| Rivastigmine 12 mg                    | RIV 12 mg              | 44.9     | 0.1    | 6.0      |
| Rivastigmine patch 10 cm <sup>2</sup> | RIV 10 cm <sup>2</sup> | 35.0     | 0.0    | 6.9      |
| Rivastigmine patch 15 cm <sup>2</sup> | RIV 15 cm <sup>2</sup> | 59.8     | 9.0    | 4.6      |
| Rivastigmine patch 5 cm <sup>2</sup>  | RIV 5 cm <sup>2</sup>  | 20.0     | 0.1    | 8.2      |
| Memantine 20 mg                       | MEM 20 mg              | 31.7     | 0.1    | 7.1      |

**Adverse events for mild to moderate AD**

**Treatment ranking**

| Treatment                             | Abbreviation           | SUCRA(%) | PrBest | MeanRank |
|---------------------------------------|------------------------|----------|--------|----------|
| Placebo                               | PBO                    | 91.3     | 37.9   | 1.8      |
| Donepezil 5 mg                        | DON 5 mg               | 78.1     | 14.0   | 3.0      |
| Donepezil 10 mg                       | DON 10 mg              | 53.7     | 0.4    | 5.2      |
| Galantamine 24 mg                     | GAL 24 mg              | 50.4     | 0.0    | 5.5      |
| Galantamine 32 mg                     | GAL 32 mg              | 15.2     | 0.0    | 8.6      |
| Rivastigmine 12 mg                    | RIV 12 mg              | 8.4      | 0.0    | 9.2      |
| Rivastigmine patch 10 cm <sup>2</sup> | RIV 10 cm <sup>2</sup> | 47.8     | 0.3    | 5.7      |
| Rivastigmine patch 15 cm <sup>2</sup> | RIV 15 cm <sup>2</sup> | 23.5     | 0.9    | 7.9      |
| Rivastigmine patch 5 cm <sup>2</sup>  | RIV 5cm <sup>2</sup>   | 44.3     | 2.8    | 6.0      |
| Memantine 20 mg                       | MEM 20 mg              | 87.3     | 43.6   | 2.1      |

## Efficacy on cognition for moderate to severe AD

### Treatment ranking

| Treatment                         | Abbreviation         | SUCRA (%) | PrBest | MeanRank |
|-----------------------------------|----------------------|-----------|--------|----------|
| Placebo                           | PBO                  | 0.3       | 0.0    | 5.0      |
| Donepezil 10 mg                   | DON 10 mg            | 57.3      | 2.9    | 2.7      |
| Donepezil 23 mg                   | DON 23 mg            | 69.6      | 20.7   | 2.2      |
| Memantine 20 mg                   | MEM 20 mg            | 31.3      | 1.2    | 3.7      |
| Memantine 20 mg + Donepezil 10 mg | MEM 20 mg + DON10 mg | 91.5      | 75.2   | 1.3      |

### Rankograms

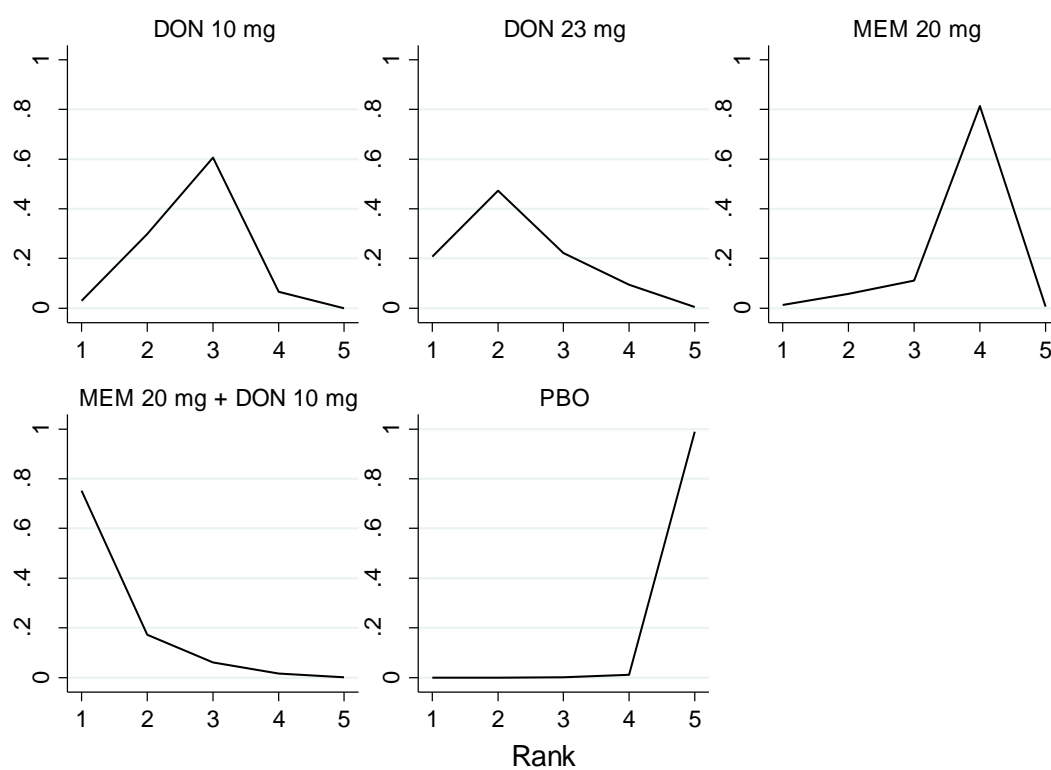

## Adverse events for moderate to severe AD

### Treatment ranking

| Treatment                         | Abbreviation             | SUCRA (%) | PrBest | MeanRank |
|-----------------------------------|--------------------------|-----------|--------|----------|
| Placebo                           | PBO                      | 89.8      | 59.5   | 1.4      |
| Donepezil 10 mg                   | DON 10 mg                | 50.3      | 0.3    | 3.0      |
| Donepezil 23 mg                   | DON 23 mg                | 4.5       | 0.0    | 4.8      |
| Memantine 20 mg                   | MEM 20 mg                | 83.5      | 40.0   | 1.7      |
| Memantine 20 mg + Donepezil 10 mg | MEM 20 mg +<br>DON 10 mg | 21.9      | 0.1    | 4.1      |

### Rankograms

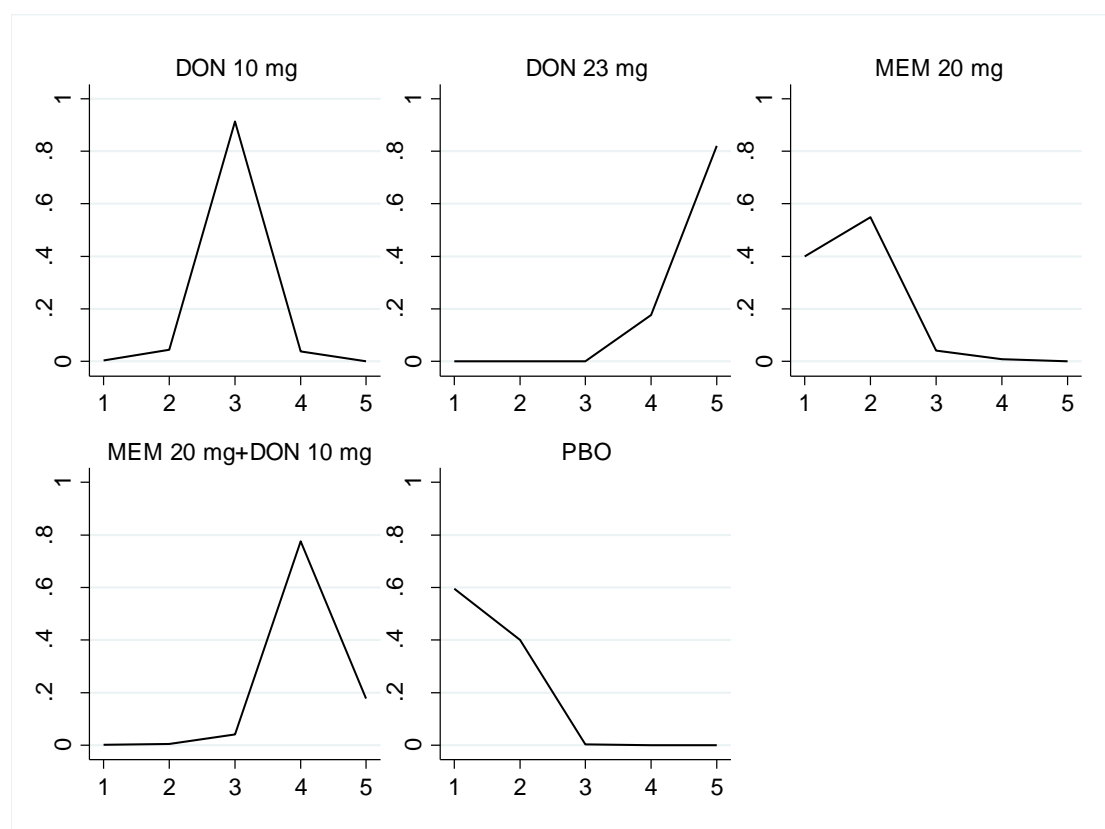

## Efficacy on function

### Treatment ranking

| Treatment                             | Abbreviation           | SUCRA (%) | PrBest | MeanRank |
|---------------------------------------|------------------------|-----------|--------|----------|
| Placebo                               | PBO                    | 1.1       | 0.0    | 8.9      |
| Donepezil 10 mg                       | DON 10 mg              | 31.2      | 0.1    | 6.5      |
| Galantamine 24 mg                     | GAL 24 mg              | 51.3      | 2.3    | 4.9      |
| Rivastigmine 12 mg                    | RIV 12 mg              | 51.4      | 0.7    | 4.9      |
| Rivastigmine patch 10 cm <sup>2</sup> | RIV 10 cm <sup>2</sup> | 58.4      | 0.7    | 4.3      |
| Rivastigmine patch 15 cm <sup>2</sup> | RIV 15 cm <sup>2</sup> | 93.2      | 67.9   | 1.5      |
| Rivastigmine patch 5 cm <sup>2</sup>  | RIV 5 cm <sup>2</sup>  | 63.5      | 5.8    | 3.9      |
| Memantine 20 mg                       | MEM 20 mg              | 23.3      | 0.1    | 7.1      |
| Memantine 20 mg + Donepezil 10 mg     | MEM 20 mg + DON 10 mg  | 76.4      | 22.3   | 2.9      |

### Rankograms

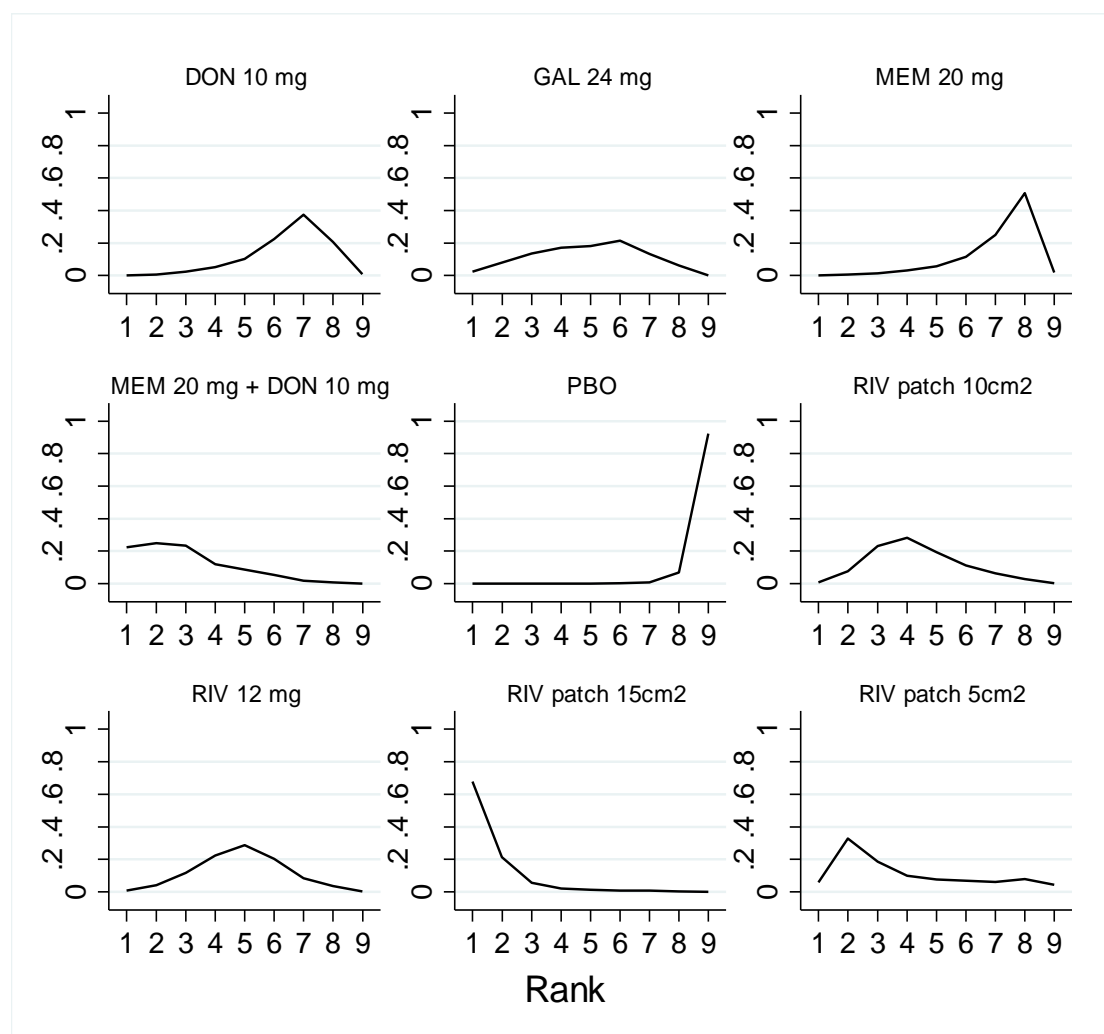

## Efficacy on behavior

### Treatment ranking

| Treatment                             | Abbreviation           | SUCRA (%) | PrBest | MeanRank |
|---------------------------------------|------------------------|-----------|--------|----------|
| Placebo                               | PBO                    | 22.8      | 0.1    | 4.9      |
| Donepezil 10 mg                       | DON 10 mg              | 65.6      | 19.6   | 2.7      |
| Galantamine 24 mg                     | GAL 24 mg              | 72.1      | 41.9   | 2.4      |
| Rivastigmine 12 mg                    | RIV 12 mg              | 42.1      | 13     | 3.9      |
| Rivastigmine patch 10 cm <sup>2</sup> | RIV 10 cm <sup>2</sup> | 33.1      | 7.7    | 4.3      |
| Memantine 20 mg                       | MEM 20 mg              | 64.3      | 17.8   | 2.8      |

### Rankograms

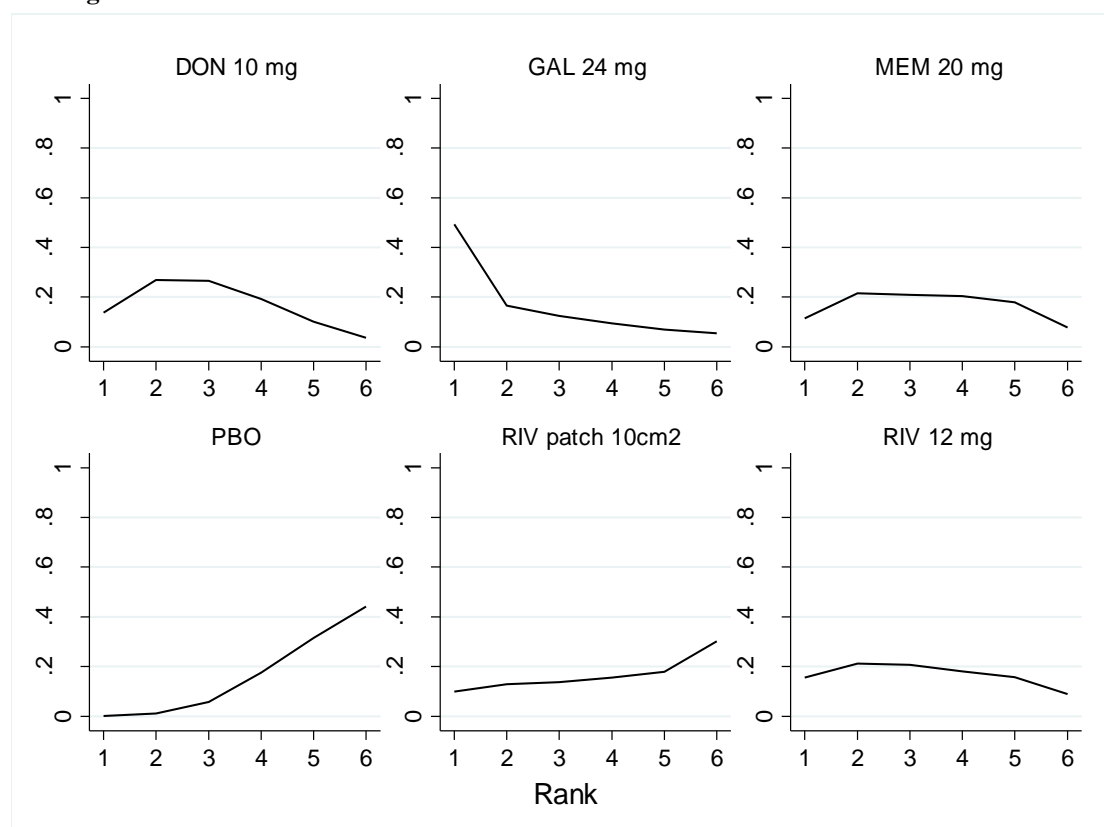

## Efficacy on global changes

### Treatment ranking

| Treatment                             | Abbreviation           | SUCRA (%) | PrBest | MeanRank |
|---------------------------------------|------------------------|-----------|--------|----------|
| Placebo                               | PBO                    | 5.7       | 0.0    | 10.4     |
| Donepezil 5 mg                        | DON 5 mg               | 71.3      | 7.2    | 3.9      |
| Donepezil 10 mg                       | DON 10 mg              | 81.7      | 14.8   | 2.8      |
| Galantamine 24 mg                     | GAL 24 mg              | 29.4      | 0.1    | 8.1      |
| Galantamine 32 mg                     | GAL 32 mg              | 39.2      | 1.5    | 7.1      |
| Rivastigmine 12 mg                    | RIV 12 mg              | 61.8      | 3.8    | 4.8      |
| Rivastigmine patch 10 cm <sup>2</sup> | RIV 10 cm <sup>2</sup> | 44.5      | 0.7    | 6.6      |
| Rivastigmine patch 15 cm <sup>2</sup> | RIV 15 cm <sup>2</sup> | 83.6      | 56.3   | 2.6      |
| Rivastigmine patch 5 cm <sup>2</sup>  | RIV 5 cm <sup>2</sup>  | 41.4      | 0.4    | 6.9      |
| Memantine 20 mg                       | MEM 20 mg              | 23.5      | 1.6    | 8.6      |
| Donepezil 23 mg                       | DON 23 mg              | 67.9      | 13.6   | 4.2      |

### Rankograms

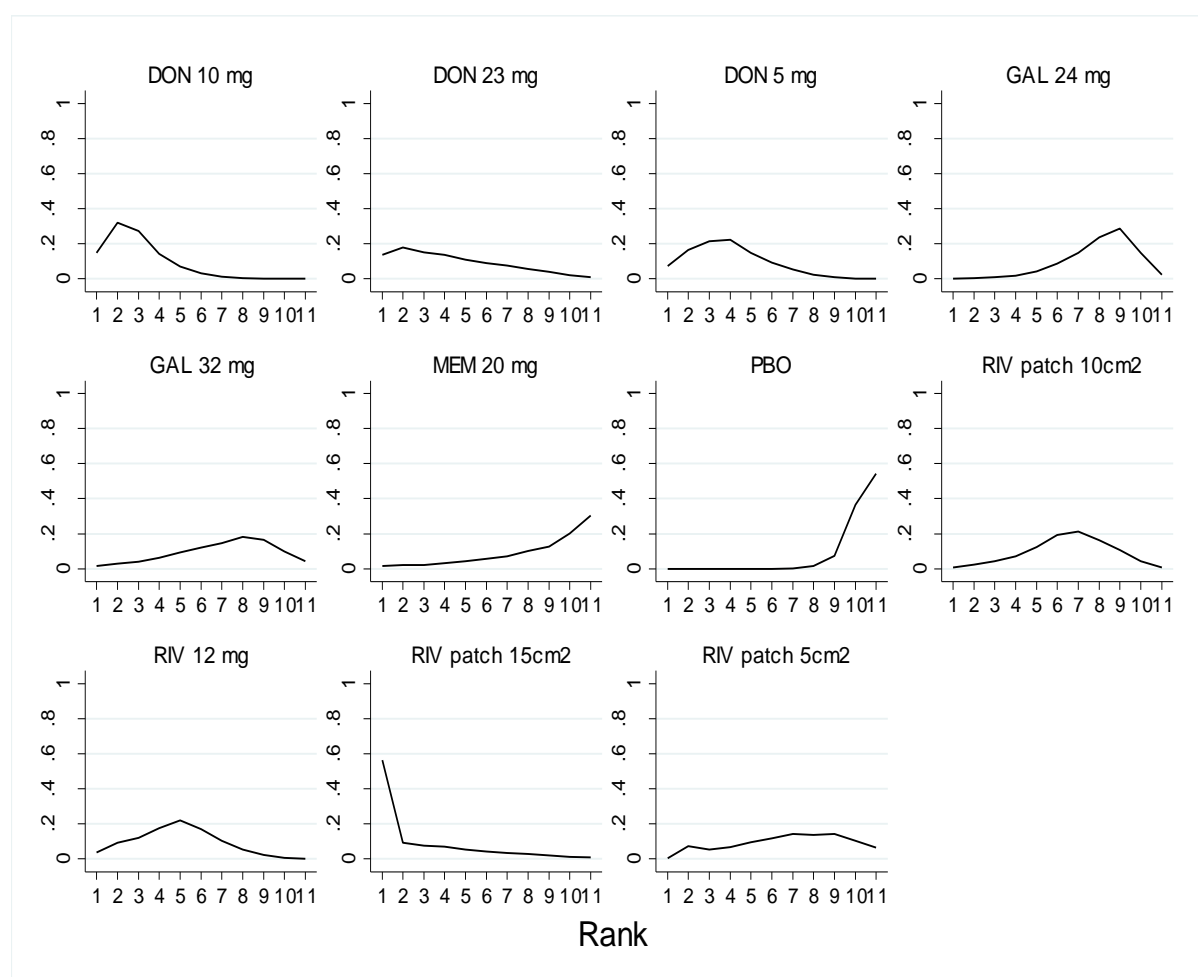

**Supplementary 9:  
Assessment of the inconsistency results for each outcome**

**Efficacy on cognition for mild to moderate AD**

| Loop                                            | IF    | Z_value | P_value | 95% CI       | $\tau^2$ |
|-------------------------------------------------|-------|---------|---------|--------------|----------|
| DON 10 mg- DON 5 mg- PBO                        | 0.338 | 2.300   | 0.021   | (0.05, 0.63) | 0.006    |
| DON 10 mg- MEM 20 mg- PBO                       | 0.248 | 0.939   | 0.348   | (0.00, 0.77) | 0.018    |
| GAL 24 mg- GAL 32 mg- PBO                       | 0.239 | 1.143   | 0.253   | (0.00, 0.65) | 0.024    |
| PBO- RIV 10cm <sup>2</sup> RIV 12 mg            | 0.067 | 0.612   | 0.541   | (0.00, 0.28) | 0.000    |
| PBO- RIV 10cm <sup>2</sup> RIV 5cm <sup>2</sup> | 0.002 | 0.016   | 0.988   | (0.00, 0.30) | 0.000    |

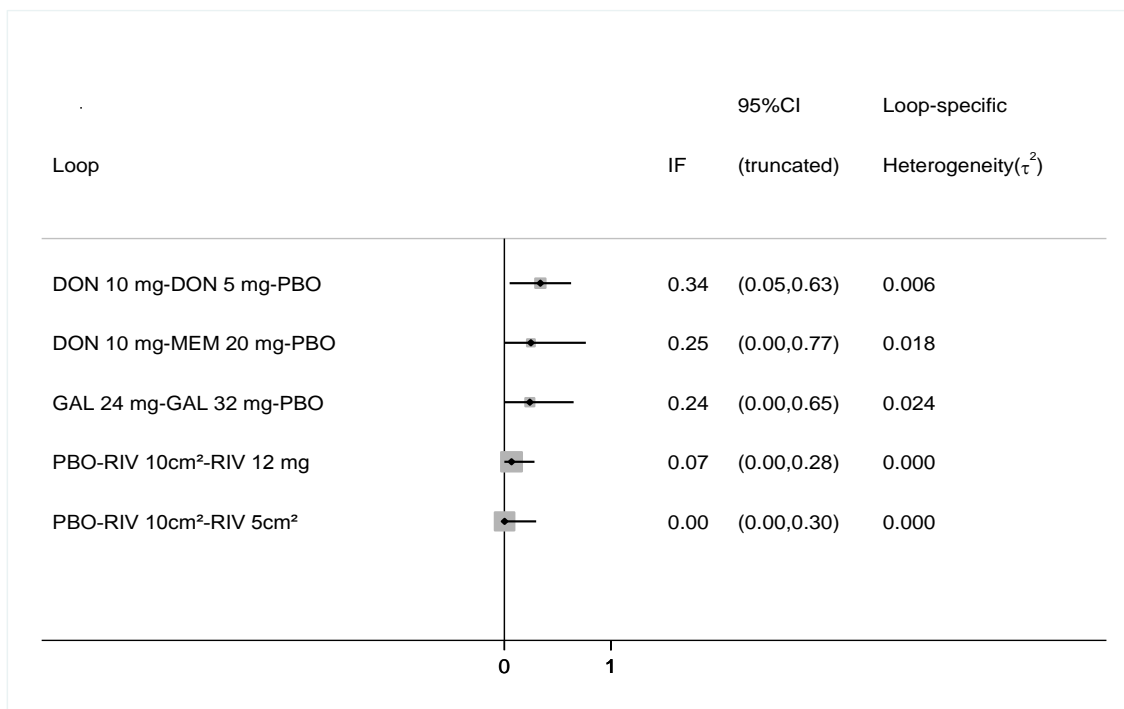

**Efficacy on cognition for moderate to severe AD**

| Loop                               | IF    | Z_value | P_value | 95% CI       | $\tau^2$ |
|------------------------------------|-------|---------|---------|--------------|----------|
| MEM20mg - MEM20mg+DON10mg-PBO      | 0.209 | 0.732   | 0.464   | (0.00, 0.77) | 0.000    |
| DON10mg - MEM20mg+DON10mg-PBO      | 0.157 | 0.406   | 0.685   | (0.00, 0.91) | 0.030    |
| DON10mg - MEM20mg-PBO              | 0.021 | 0.065   | 0.949   | (0.00, 0.67) | 0.041    |
| DON10mg - MEM20mg- MEM20mg+DON10mg | ...   | ...     | ...     | ...          | 0.000    |

Note: Loop DON 10 mg-MEM 20 mg-MEM 20 mg+DON 10 mg is formed only by multi-arm trial(s) - Consistent by definition

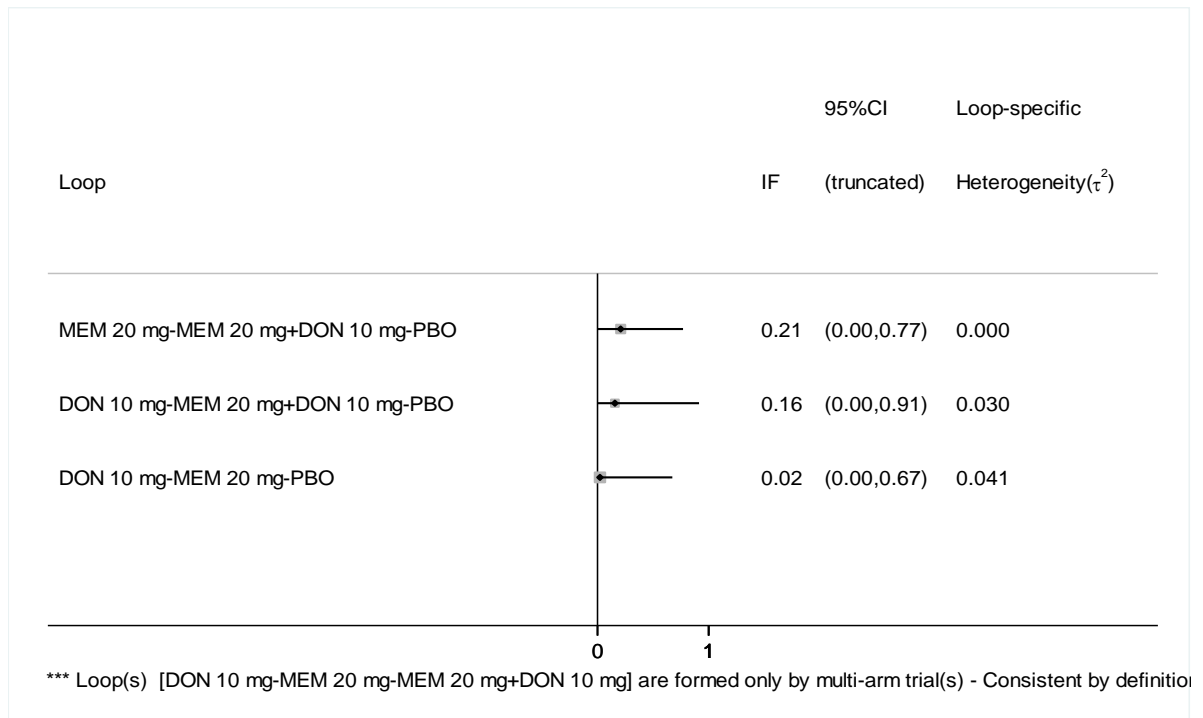



**All-cause adverse events for mild to moderate AD**

| Loop                                          | IF    | Z_value | P_value | 95% CI      | $\tau^2$ |
|-----------------------------------------------|-------|---------|---------|-------------|----------|
| DON10mg- DON5mg- PBO                          | 0.643 | 1.914   | 0.056   | (0.00,1.30) | 0.021    |
| PBO- RIV10cm <sup>2</sup> RIV12mg             | 0.500 | 1.880   | 0.060   | (0.00,1.02) | 0.000    |
| PBO- RIV10cm <sup>2</sup> RIV5cm <sup>2</sup> | 0.426 | 1.154   | 0.249   | (0.00,1.15) | 0.000    |
| GAL24mg- GAL32mg- PBO                         | 0.349 | 0.905   | 0.366   | (0.00,1.11) | 0.025    |

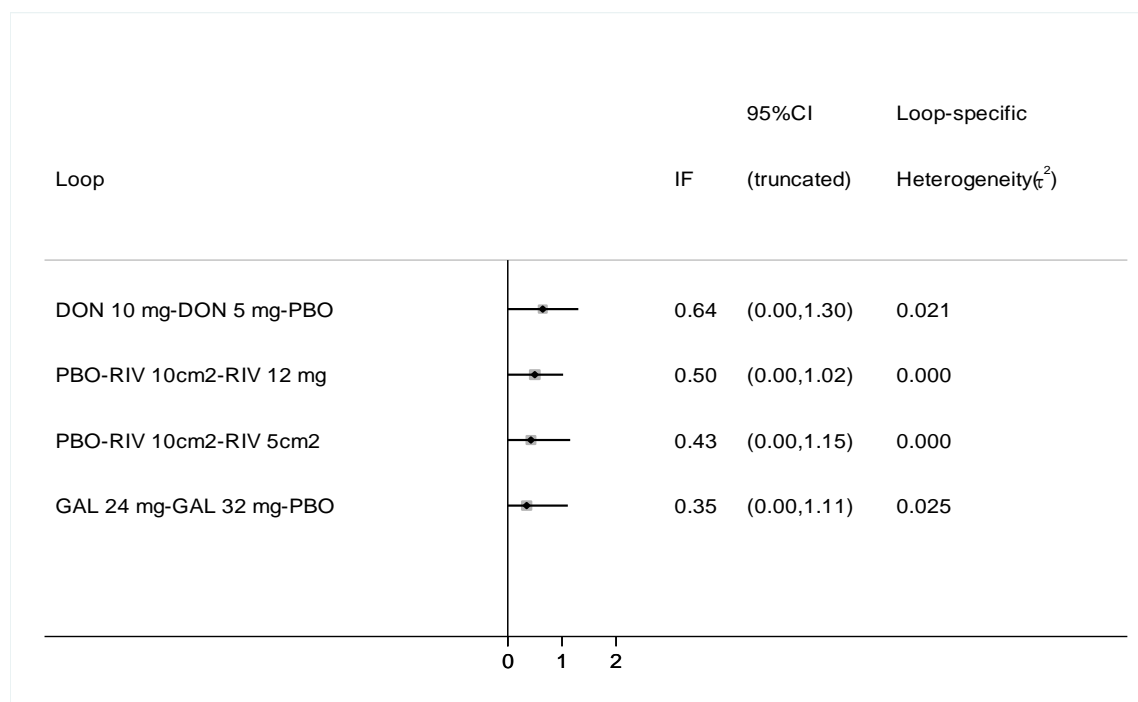

**Efficacy on function**

| Loop                              | IF    | Z_value | P_value | 95% CI       | $\tau^2$ |
|-----------------------------------|-------|---------|---------|--------------|----------|
| MEM20mg-MEM20mg+DON10mg-PBO       | 0.304 | 1.072   | 0.284   | (0.00, 0.86) | 0.006    |
| DON10mg-PBO-RIV12mg               | 0.170 | 1.134   | 0.257   | (0.00, 0.46) | 0.003    |
| DON10mg-MEM20mg+DON10mg-PBO       | 0.166 | 0.740   | 0.459   | (0.00, 0.60) | 0.000    |
| DON10mg-MEM20mg-MEM20mg+DON10mg   | 0.124 | 0.548   | 0.584   | (0.00, 0.57) | 0.000    |
| DON10mg-MEM20mg-PBO               | 0.075 | 0.479   | 0.632   | (0.00, 0.38) | 0.001    |
| PBO-RIV10cm <sup>2</sup> -RIV12mg | 0.060 | 0.392   | 0.695   | (0.00, 0.36) | 0.000    |

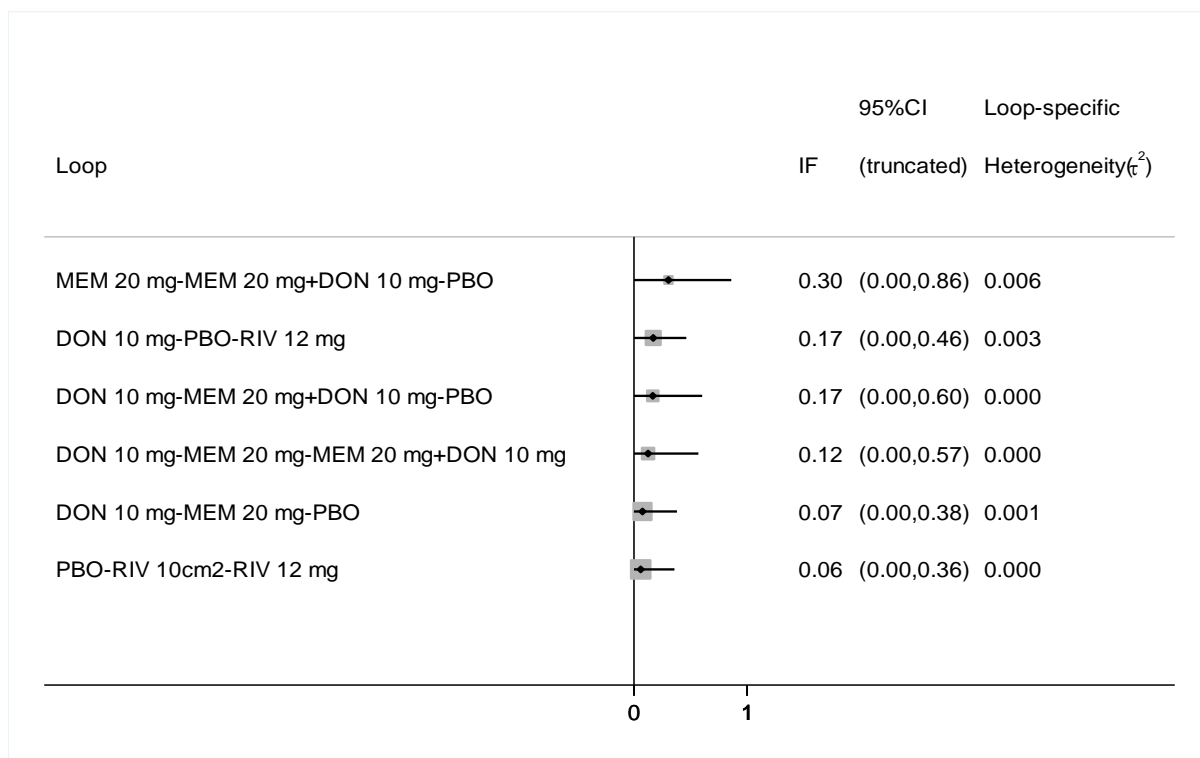

**Efficacy on behavior**

| Loop                              | IF    | Z_value | P_value | 95% CI       | $\tau^2$ |
|-----------------------------------|-------|---------|---------|--------------|----------|
| DON10mg-MEM20mg-PBO               | 0.385 | 1.597   | 0.110   | (0.00, 0.86) | 0.020    |
| DON10mg-PBO- RIV12mg              | 0.151 | 0.527   | 0.598   | (0.00, 0.71) | 0.030    |
| PBO-RIV12mg- RIV10cm <sup>2</sup> | 0.017 | 0.111   | 0.912   | (0.00,0.32)  | 0.000    |

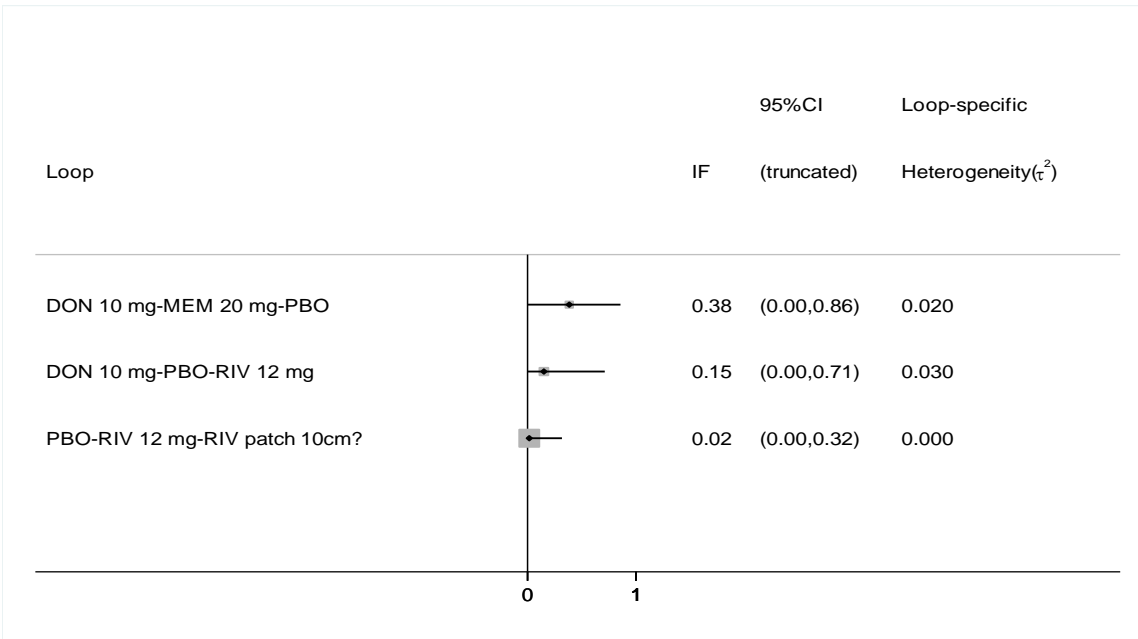

**Efficacy on global changes**

| Loop                                            | IF    | Z_value | P_value | 95% CI      | $\tau^2$ |
|-------------------------------------------------|-------|---------|---------|-------------|----------|
| DON 10 mg-DON 5 mg-PBO                          | 0.557 | 1.766   | 0.077   | (0.00,1.18) | 0.045    |
| PBO-RIV 10cm <sup>2</sup> -RIV 12 mg            | 0.419 | 1.656   | 0.098   | (0.00,0.91) | 0.000    |
| PBO-RIV 10cm <sup>2</sup> -RIV 5cm <sup>2</sup> | 0.289 | 0.796   | 0.426   | (0.00,1.00) | 0.000    |
| GAL 24 mg-GAL 32 mg-PBO                         | 0.017 | 0.038   | 0.970   | (0.00,0.91) | 0.088    |

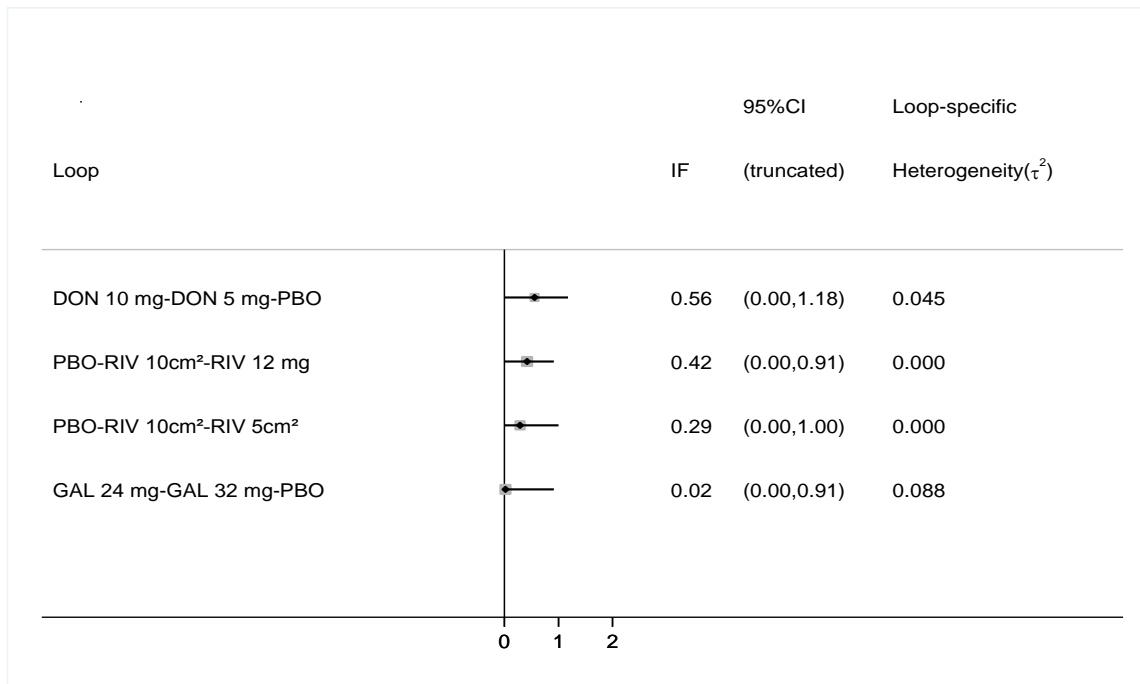

## Evaluation the inconsistency by node-splitting model

### Efficacy on cognition for mild to moderate AD

| Comparisons                                     | Direct |       | Indirect |        | Differences |        |         | $\tau^2$ |
|-------------------------------------------------|--------|-------|----------|--------|-------------|--------|---------|----------|
|                                                 | SMD    | SE    | SMD      | SE     | SMD         | SE     | P-value |          |
| PBO vs DON 5 mg                                 | -0.371 | 0.054 | 0.308    | 0.195  | -0.679      | 0.203  | 0.001   | 5.00e-09 |
| PBO vs DON 10 mg                                | -0.417 | 0.057 | -0.322   | 0.158  | -0.095      | 0.167  | 0.571   | 0.053    |
| PBO vs GAL 24 mg                                | ...    | ...   | ...      | ...    | ...         | ...    | ...     | ...      |
| PBO vs GAL 32 mg                                | -0.551 | 0.079 | -0.350   | 0.185  | 0.201       | 0.202  | 0.318   | 0.052    |
| PBO vs RIV 12 mg                                | -0.296 | 0.062 | -0.271   | 0.153  | -0.025      | 0.165  | 0.879   | 0.060    |
| PBO vs RIV 10 cm <sup>2</sup>                   | -0.242 | 0.074 | -0.302   | 0.131  | 0.060       | 0.150  | 0.689   | 0.058    |
| PBO vs RIV 5 cm <sup>2</sup>                    | -0.159 | 0.106 | -0.217   | 0.246  | 0.058       | 0.399  | 0.882   | 0.132    |
| PBO vs MEM 20 mg                                | -0.188 | 0.077 | -0.470   | 0.168  | 0.282       | 0.185  | 0.127   | 0.035    |
| DON 5 mg vs DON 10 mg                           | -0.168 | 0.059 | 0.360    | 0.145  | -0.528      | 0.157  | 0.001   | 1.98e-09 |
| DON 10 mg vs MEM 20 mg                          | -0.036 | 0.159 | 0.246    | 0.094  | -0.282      | 0.185  | 0.127   | 0.035    |
| GAL24 mg vs GAL 32 mg                           | 0.014  | 0.078 | -0.187   | 0.186  | 0.201       | 0.202  | 0.318   | 0.052    |
| RIV 12 mg vs RIV 10 cm <sup>2</sup>             | 0.016  | 0.076 | 0.090    | 0.127  | -0.075      | 0.148  | 0.614   | 0.057    |
| RIV 10cm <sup>2</sup> vs RIV 5 cm <sup>2</sup>  | 0.080  | 0.105 | 0.138    | 0.247  | -0.058      | 0.268  | 0.828   | 0.060    |
| RIV 10cm <sup>2</sup> vs RIV 15 cm <sup>2</sup> | -0.098 | 0.099 | 0.512    | 73.781 | -0.610      | 73.781 | 0.993   | 0.049    |

### Efficacy on cognition for moderate to severe AD

| Comparisons                          | Direct |       | Indirect |        | Differences |        |         | $\tau^2$ |
|--------------------------------------|--------|-------|----------|--------|-------------|--------|---------|----------|
|                                      | SMD    | SE    | SMD      | SE     | SMD         | SE     | P-value |          |
| PBO vs DON 10 mg                     | 0.548  | 0.093 | 0.223    | 0.346  | 0.325       | 0.357  | 0.363   | 0.164    |
| PBO vs MEM 20 mg                     | 0.327  | 0.129 | 0.402    | 0.458  | -0.075      | 0.475  | 0.874   | 0.179    |
| PBO vs<br>MEM 20 mg +DON 10 mg       | 0.666  | 0.260 | 0.804    | 0.208  | -0.137      | 0.335  | 0.681   | 0.178    |
| DON 10mg vs DON 23 mg                | 0.064  | 0.132 | -1.074   | 44.686 | 1.138       | 44.686 | 0.980   | 0.166    |
| DON 10mg vs MEM 20 mg                | -0.235 | 0.265 | -0.180   | 0.172  | -0.055      | 0.316  | 0.862   | 0.179    |
| DON 10mg vs<br>MEM 20 mg +DON 10 mg  | 0.230  | 0.162 | 0.155    | 0.445  | 0.07        | 0.475  | 0.874   | 0.178    |
| MEM 20 mg vs<br>MEM 20 mg +DON 10 mg | 0.259  | 0.253 | 0.584    | 0.252  | -0.325      | 0.357  | 0.363   | 0.164    |

### All-cause adverse events for mild to moderate AD

| Comparisons                  | Direct |       | Indirect |       | Differences |        |         | $\tau^2$ |
|------------------------------|--------|-------|----------|-------|-------------|--------|---------|----------|
|                              | Log OR | SE    | Log OR   | SE    | Log OR      | SE     | P-value |          |
| PBO vs DON 5 mg              | -2.185 | 0.447 | 1.498    | 1.472 | -3.684      | 1.538  | 0.017   | 0.650    |
| PBO vs DON 10 mg             | -2.262 | 0.446 | -1.922   | 1.252 | -0.340      | 1.3326 | 0.797   | 0.789    |
| PBO vs GAL 24 mg             | ...    | ...   | ...      | ...   | ...         | ...    | ...     | ...      |
| PBO vs GAL 32 mg             | -3.312 | 0.664 | -5.839   | 1.508 | 2.526       | 1.646  | 0.125   | 0.713    |
| PBO vs RIV 12 mg             | -2.044 | 0.581 | -1.383   | 1.331 | -0.661      | 1.452  | 0.649   | 0.795    |
| PBO vs RIV 10cm <sup>2</sup> | -1.384 | 0.662 | -2.179   | 1.190 | 0.794       | 1.362  | 0.560   | 0.788    |

|                                                  |        |       |        |         |        |         |       |       |
|--------------------------------------------------|--------|-------|--------|---------|--------|---------|-------|-------|
| PBO vs RIV 5 cm <sup>2</sup>                     | -0.800 | 0.905 | -2.065 | 2.179   | 1.265  | 2.361   | 0.592 | 0.793 |
| PBO vs MEM 20 mg                                 | -1.336 | 0.749 | -2.566 | 1.340   | 1.230  | 1.535   | 0.423 | 0.765 |
| DON 5 mg vs DON 10 mg                            | -0.893 | 0.519 | 1.704  | 1.048   | -2.597 | 1.169   | 0.026 | 0.666 |
| DON 10 mg vs MEM 20 mg                           | -0.240 | 1.268 | 0.990  | 0.865   | -1.230 | 1.535   | 0.423 | 0.765 |
| GAL24 mg vs GAL 32 mg                            | -1.812 | 0.646 | 0.715  | 1.531   | -2.526 | 1.646   | 0.125 | 0.713 |
| RIV 12 mg vs RIV 10 cm <sup>2</sup>              | 0.099  | 0.681 | 1.110  | 1.137   | 1.011  | 1.325   | 0.445 | 0.781 |
| RIV 10 cm <sup>2</sup> vs RIV 5 cm <sup>2</sup>  | 0.4    | 0.903 | 1.665  | 2.181   | -1.265 | 2.361   | 0.592 | 0.793 |
| RIV 10 cm <sup>2</sup> vs RIV 15 cm <sup>2</sup> | -0.800 | 1.041 | 3.135  | 515.744 | -3.935 | 515.745 | 0.994 | 0.764 |

#### All-cause adverse events for moderate to severe AD

| Comparisons                          | Direct |       | Indirect |         | Differences |         |         | $\tau^2$ |
|--------------------------------------|--------|-------|----------|---------|-------------|---------|---------|----------|
|                                      | Log OR | SE    | Log OR   | SE      | Log OR      | SE      | P-value |          |
| PBO vs DON 10 mg                     | 0.424  | 0.149 | -0.248   | 40.213  | 0.672       | 40.213  | 0.987   | 1.48e-10 |
| PBO vs MEM 20 mg                     | ...    | ...   | ...      | ...     | ...         | ...     | ...     | ...      |
| DON 10 mg vs MEM 20 mg               | 0.498  | 0.107 | -0.924   | 98.448  | 1.422       | 98.449  | 0.988   | 1.65e-06 |
| DON 10 mg vs<br>MEM 20 mg +DON 10 mg | 0.327  | 0.232 | -0.834   | 146.045 | 1.161       | 146.045 | 0.994   | 6.26e-09 |

#### Efficacy on function

| Comparisons                                     | Direct |       | Indirect |        | Differences |        |         | $\tau^2$ |
|-------------------------------------------------|--------|-------|----------|--------|-------------|--------|---------|----------|
|                                                 | SMD    | SE    | SMD      | SE     | SMD         | SE     | P-value |          |
| PBO vs DON 10 mg                                | 0.209  | 0.069 | 0.055    | 0.081  | 0.154       | 0.107  | 0.149   | 2.16e-09 |
| PBO vs GAL 24 mg                                | ...    | ...   | ...      | ...    | ...         | ...    | ...     | ...      |
| PBO vs RIV 12 mg                                | 0.162  | 0.084 | 0.275    | 0.084  | -0.114      | 0.119  | 0.339   | 1.19e-09 |
| PBO vs RIV 10cm <sup>2</sup>                    | 0.234  | 0.087 | 0.261    | 0.126  | -0.026      | 0.153  | 0.864   | 4.35e-08 |
| PBO vs MEM 20 mg                                | 0.101  | 0.052 | 0.157    | 0.145  | -0.055      | 0.154  | 0.721   | 1.44e-10 |
| PBO vs MEM 20 mg +DON 10 mg                     | 0.501  | 0.190 | 0.260    | 0.104  | 0.242       | 0.217  | 0.265   | 4.15e-10 |
| DON 10mg vs RIV 12 mg                           | 0.107  | 0.066 | -0.002   | 0.100  | 0.109       | 0.119  | 0.360   | 3.49e-08 |
| DON 10mg vs MEM 20 mg                           | -0.048 | 0.122 | -0.031   | 0.078  | -0.016      | 0.144  | 0.911   | 1.03e-08 |
| DON 10 mg vs<br>MEM 20 mg +DON 10 mg            | 0.170  | 0.089 | 0.186    | 0.224  | -0.016      | 0.241  | 0.946   | 1.52e-09 |
| RIV 12 mg vs RIV 10 cm <sup>2</sup>             | 0.310  | 0.064 | -0.053   | 0.228  | 0.084       | 0.237  | 0.723   | 4.28e-10 |
| RIV 10 cm <sup>2</sup> vs RIV 15cm <sup>2</sup> | 0.183  | 0.087 | -0.237   | 28.224 | 0.420       | 28.224 | 0.988   | 7.35e-08 |
| RIV 15 cm <sup>2</sup> vs RIV 5cm <sup>2</sup>  | -0.137 | 0.078 | -0.855   | 63.146 | 0.717       | 63.146 | 0.991   | 8.81e-10 |
| MEM 20 mg vs<br>MEM 20 mg +DON 10 mg            | 0.121  | 0.162 | 0.257    | 0.120  | -0.136      | 0.203  | 0.503   | 3.38e-07 |

#### Efficacy on behavior

| Comparisons      | Direct |       | Indirect |       | Differences |       |         | $\tau^2$ |
|------------------|--------|-------|----------|-------|-------------|-------|---------|----------|
|                  | SMD    | SE    | SMD      | SE    | SMD         | SE    | P-value |          |
| PBO vs DON 10 mg | -0.157 | 0.075 | 0.062    | 0.127 | -0.219      | 0.148 | 0.138   | 0.108    |
| PBO vs GAL 24 mg | ...    | ...   | ...      | ...   | ...         | ...   | ...     | ...      |
| PBO vs RIV 12 mg | -0.040 | 0.154 | -0.003   | 0.414 | -0.037      | 0.442 | 0.934   | 0.127    |

|                                     |           |       |        |       |        |       |       |       |
|-------------------------------------|-----------|-------|--------|-------|--------|-------|-------|-------|
| PBO vs RIV 10cm <sup>2</sup>        | -2.25e-08 | 0.154 | -0.037 | 0.413 | 0.037  | 0.442 | 0.934 | 0.127 |
| PBO vs MEM 20 mg                    | -0.041    | 0.070 | -0.260 | 0.131 | 0.219  | 0.148 | 0.138 | 0.108 |
| DON 10 mg vs MEM 20 mg              | -0.103    | 0.107 | 0.116  | 0.103 | -0.219 | 0.148 | 0.138 | 0.108 |
| RIV 12 mg vs RIV 10 cm <sup>2</sup> | ...       | ...   | ...    | ...   | ...    | ...   | ...   | ...   |

### Efficacy on global changes

| Comparisons                                   | Direct |       | Indirect |         | Differences |         |         | $\tau^2$ |
|-----------------------------------------------|--------|-------|----------|---------|-------------|---------|---------|----------|
|                                               | Log OR | SE    | Log OR   | SE      | Log OR      | SE      | P-value |          |
| PBO vs DON 5 mg                               | 0.751  | 0.152 | -0.239   | 0.495   | 0.990       | 0.523   | 0.058   | 0.193    |
| PBO vs DON 10 mg                              | 0.688  | 0.127 | 2.336    | 0.722   | -1.649      | 0.736   | 0.025   | 0.179    |
| PBO vs GAL 24 mg                              | ...    | ...   | ...      | ...     | ...         | ...     | ...     | ...      |
| PBO vs GAL 32 mg                              | 0.353  | 0.253 | 0.397    | 0.579   | -0.045      | 0.635   | 0.944   | 0.232    |
| PBO vs RIV 12 mg                              | 0.614  | 0.179 | 0.309    | 0.436   | 0.305       | 0.471   | 0.518   | 0.228    |
| PBO vs RIV 10cm <sup>2</sup>                  | 0.276  | 0.205 | 0.856    | 0.345   | -0.579      | 0.401   | 0.149   | 0.202    |
| PBO vs RIV 5 cm <sup>2</sup>                  | 0.393  | 0.326 | 0.379    | 0.724   | 0.014       | 0.802   | 0.986   | 0.235    |
| PBO vs MEM 20 mg                              | ...    | ...   | ...      | ...     | ...         | ...     | ...     | ...      |
| DON 5mg vs DON 10 mg                          | 0.245  | 0.147 | -0.801   | 0.348   | 1.047       | 0.378   | 0.006   | 0.157    |
| DON 10mg vs DON 23 mg                         | -0.102 | 0.216 | -1.489   | 113.547 | 1.387       | 113.547 | 0.990   | 0.220    |
| GAL 24 mg vs GAL 32 mg                        | 0.089  | 0.248 | 0.044    | 0.585   | 0.045       | 0.635   | 0.944   | 0.232    |
| RIV 12 mg vs RIV 10 cm <sup>2</sup>           | -0.066 | 0.208 | -0.398   | 0.381   | 0.332       | 0.434   | 0.444   | 0.225    |
| RIV 10cm <sup>2</sup> vs RIV 5cm <sup>2</sup> | -0.039 | 0.315 | -0.025   | 0.739   | -0.014      | 0.802   | 0.986   | 0.235    |
| RIV 5cm <sup>2</sup> vs RIV 15cm <sup>2</sup> | 0.524  | 0.298 | -0.820   | 157.021 | 1.344       | 157.021 | 0.993   | 0.220    |

**Supplementary 10:  
Comparison-adjusted funnel plot for each outcome from the network meta-analysis**

**Comparison-adjusted funnel plot of efficacy on cognition for mild to moderate AD**

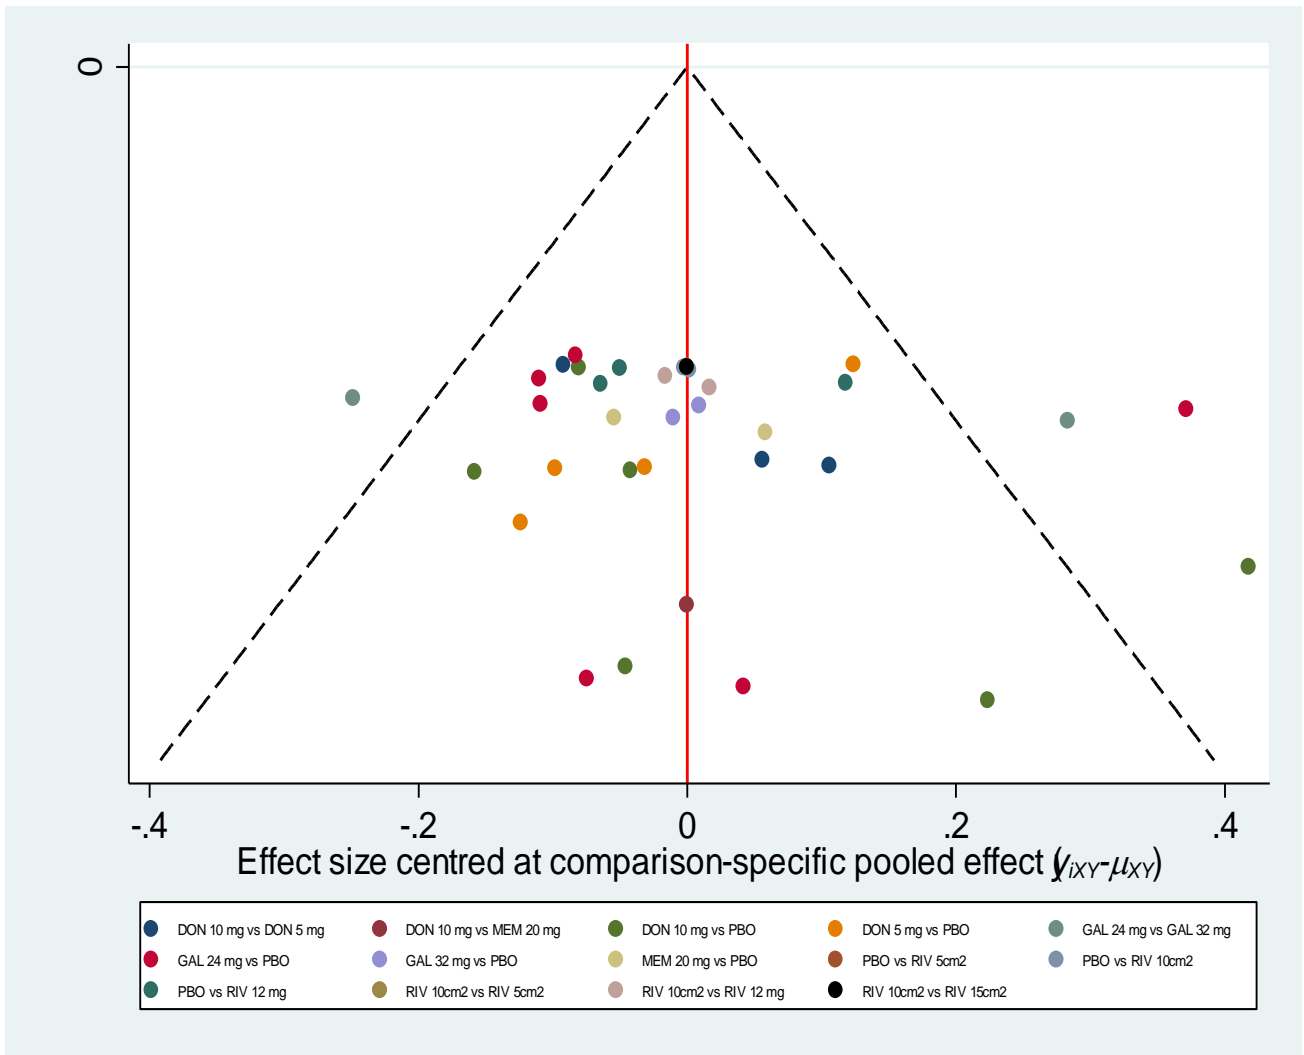



Comparison-adjusted funnel plot of efficacy on cognition for moderate to severe AD

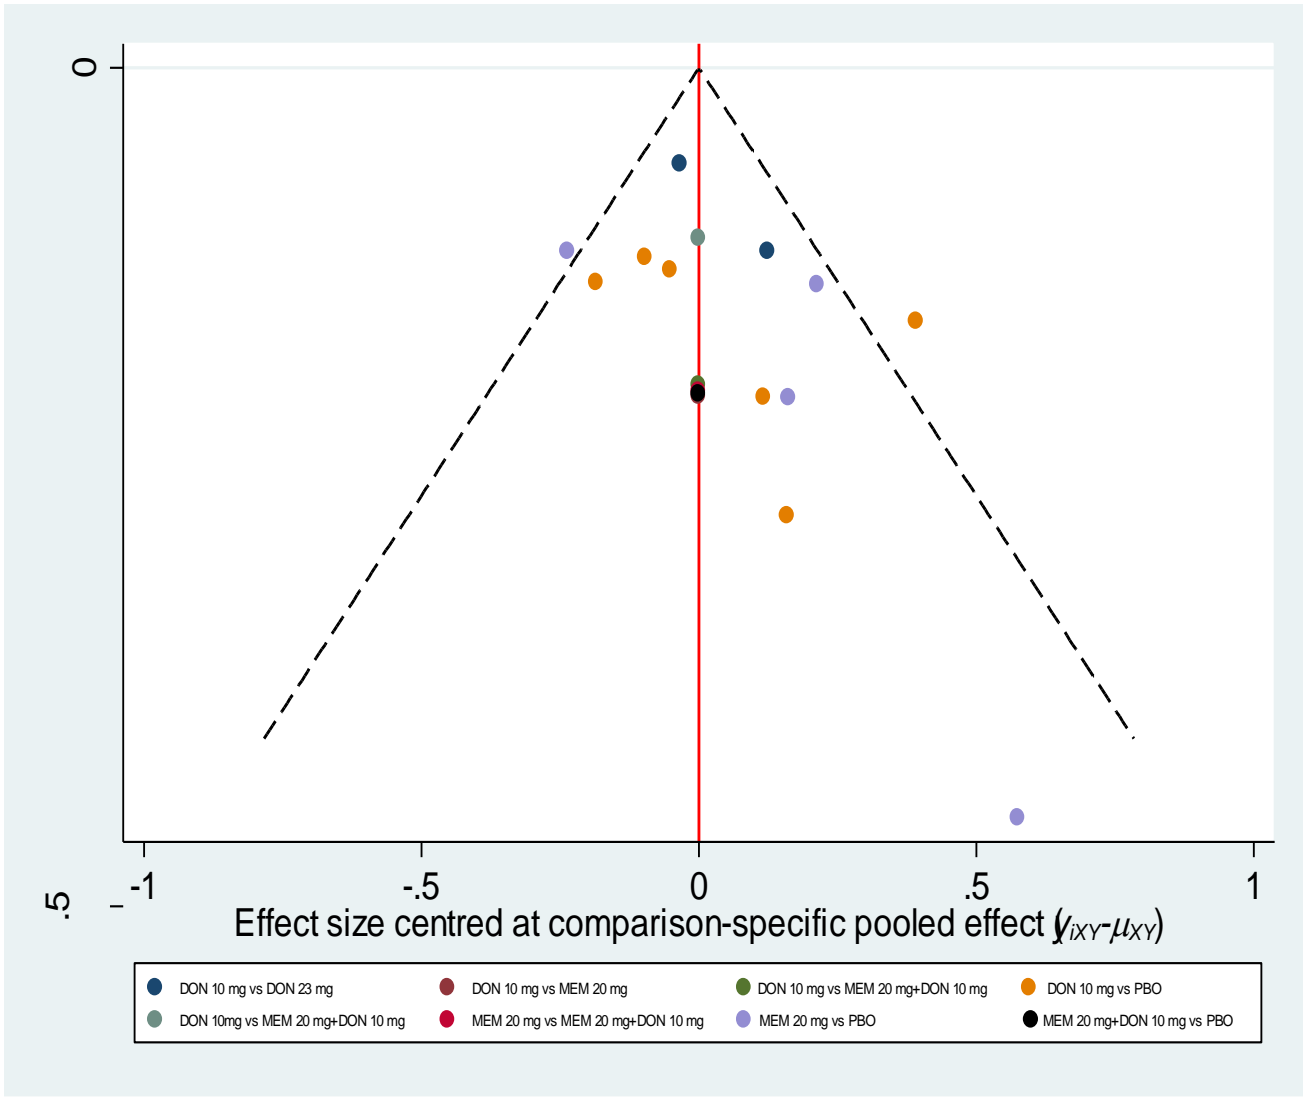

Comparison-adjusted funnel plot of tolerability for mild to moderate AD

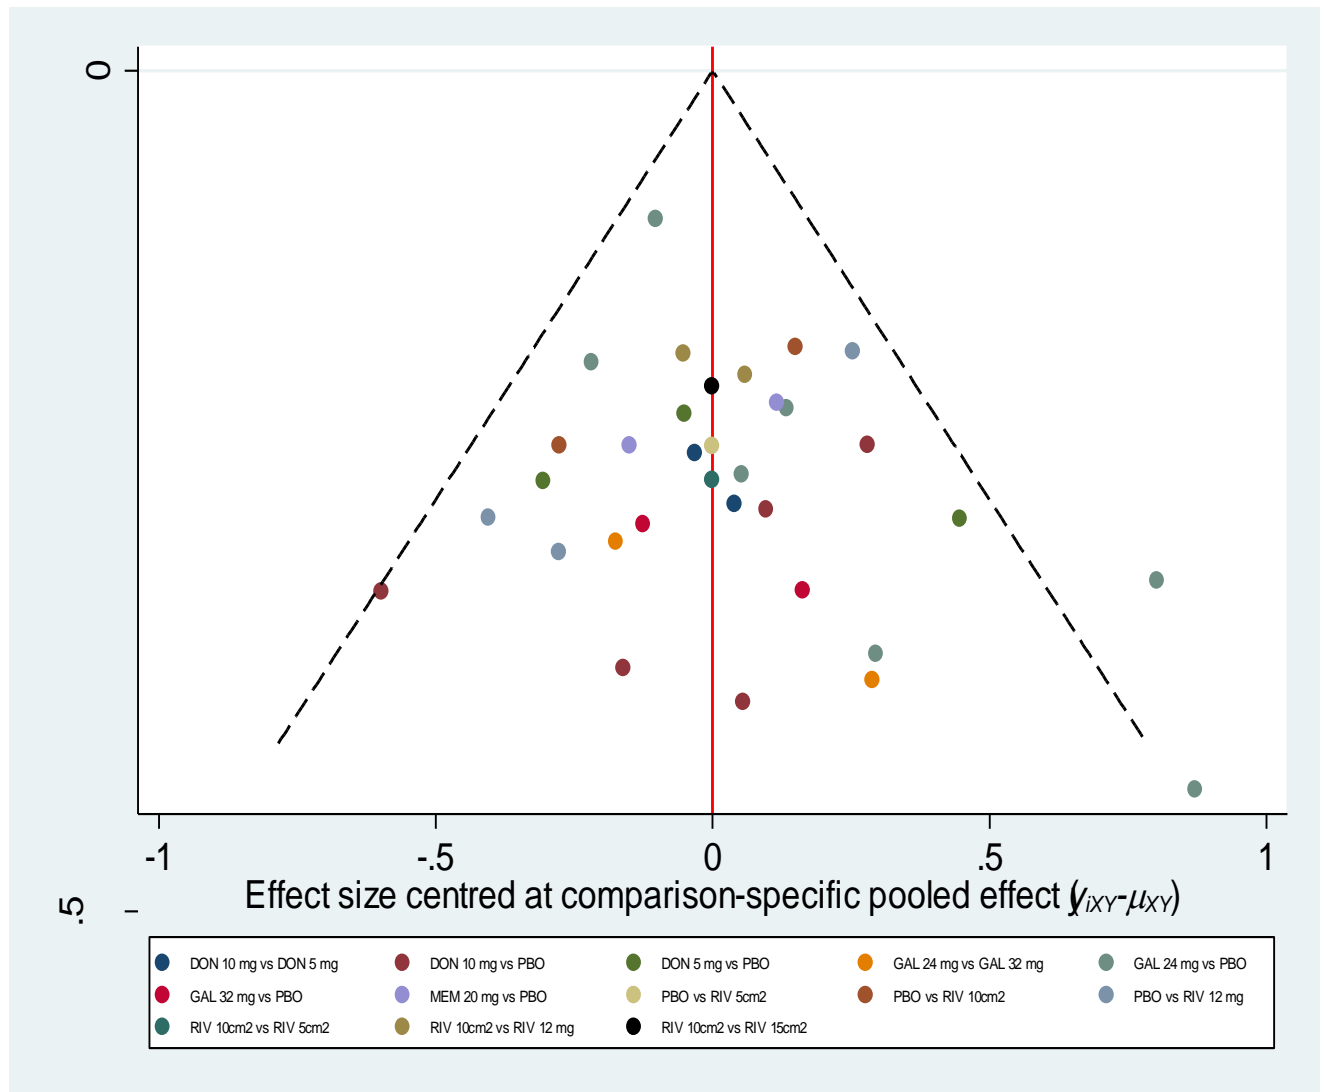

Comparison-adjusted funnel plot of tolerability for moderate to severe AD

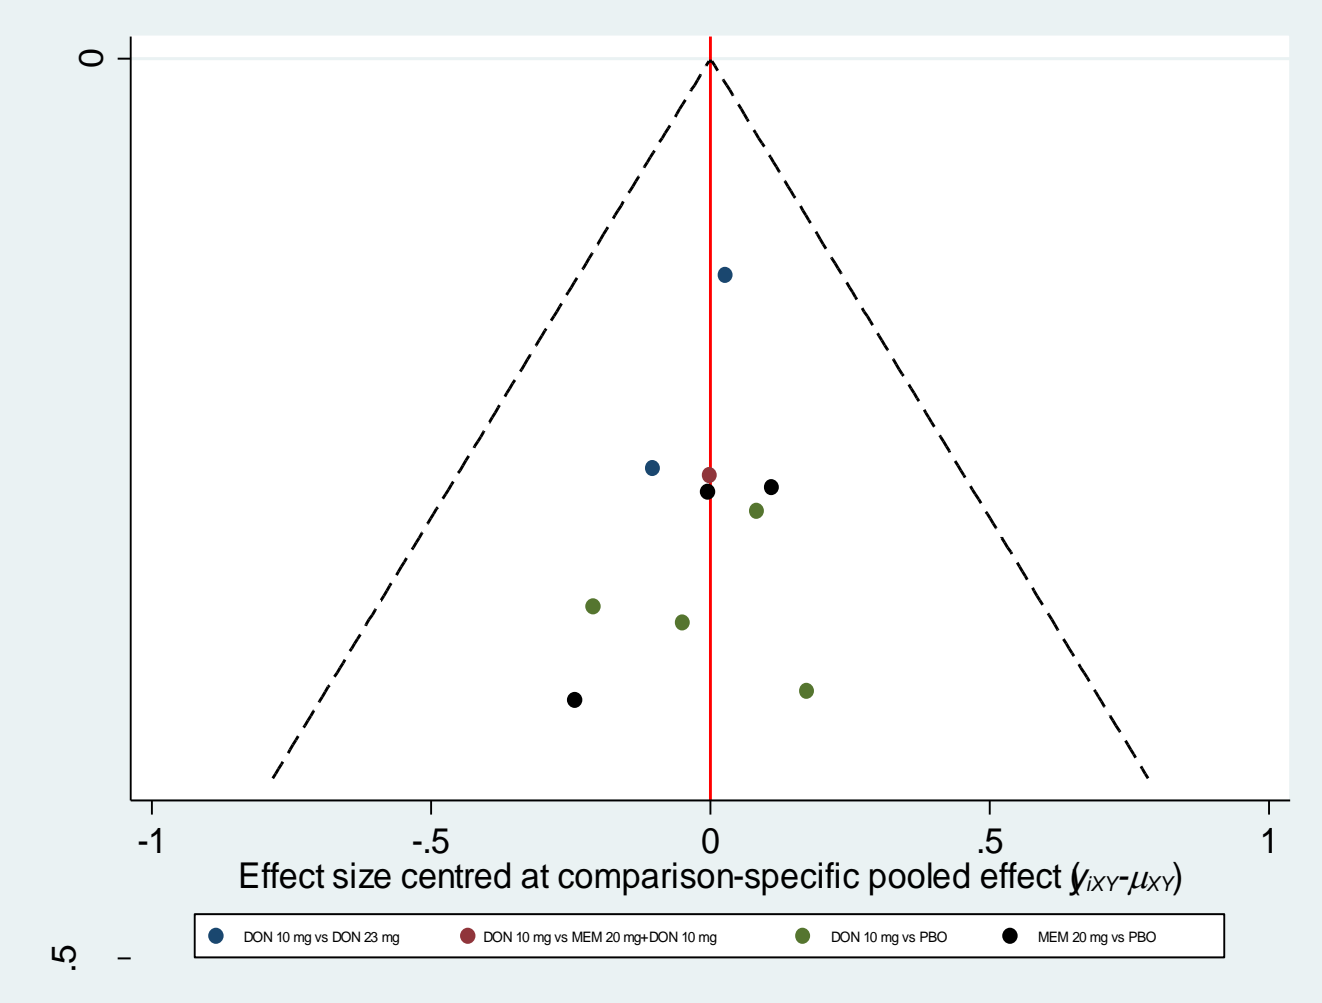

Comparison-adjusted funnel plot of efficacy on function

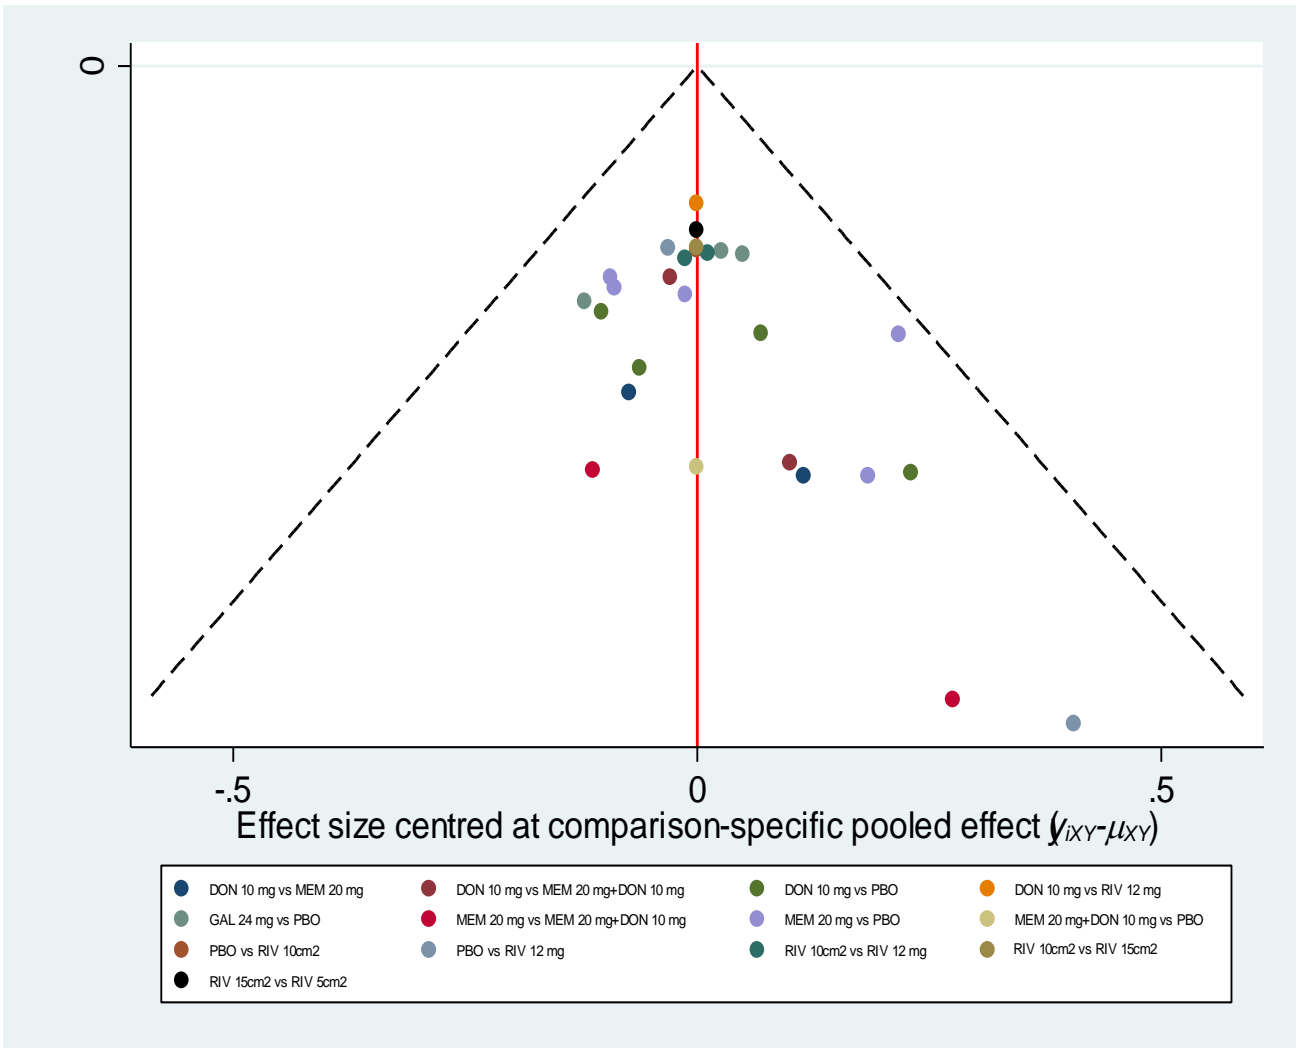

### Comparison-adjusted funnel plot of efficacy on behavior

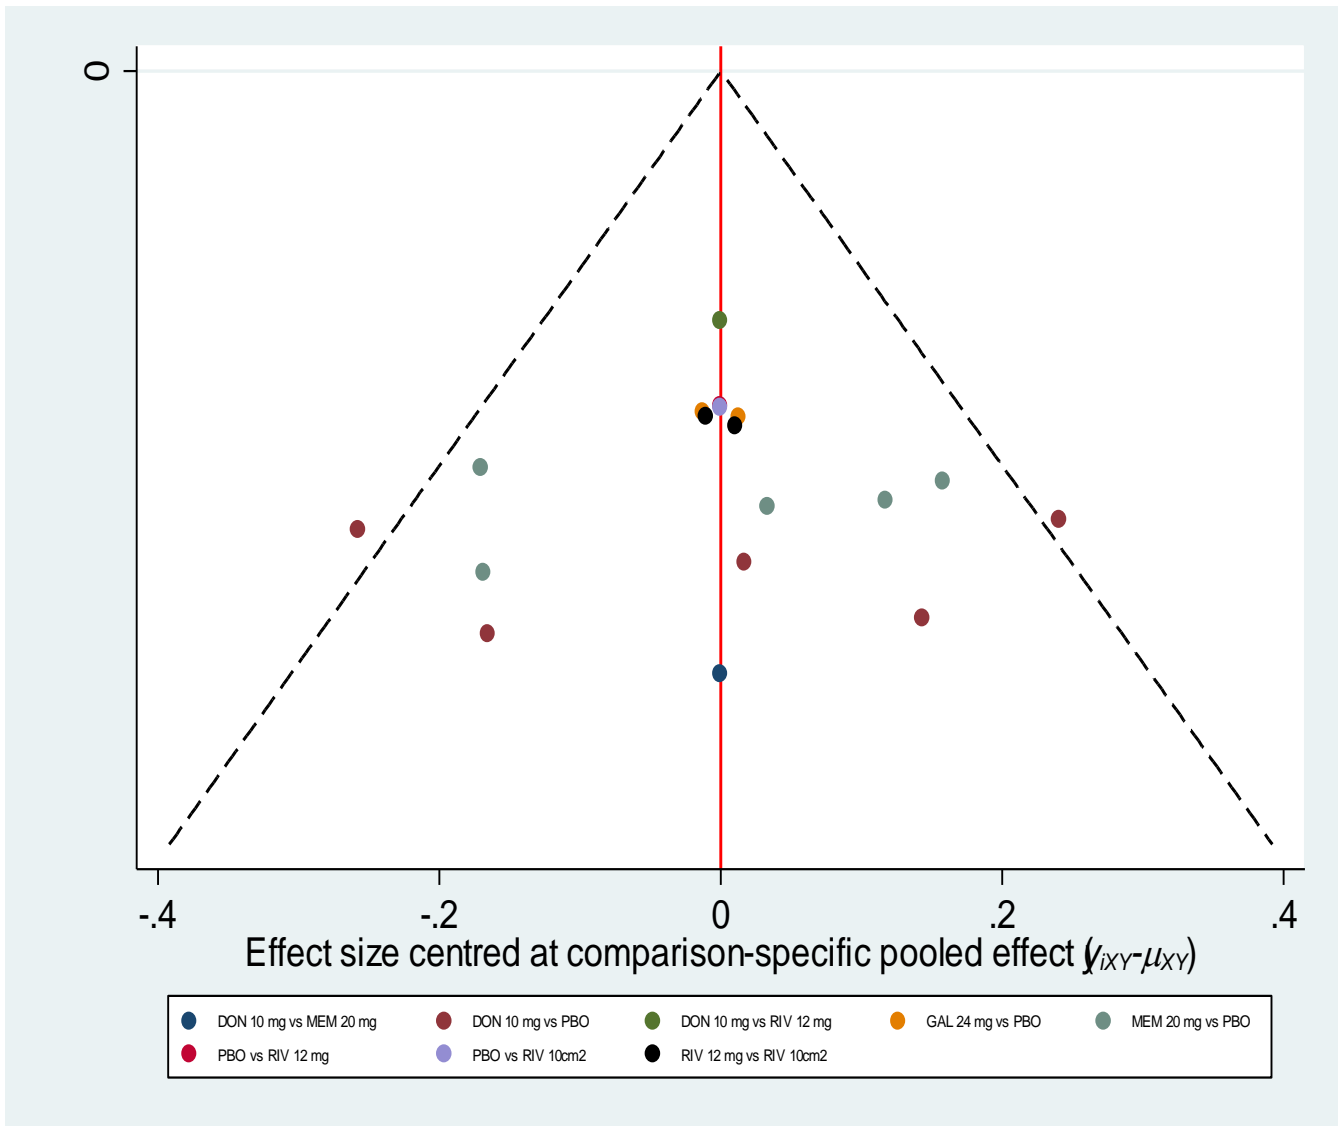

Comparison-adjusted funnel plot of efficacy on global changes

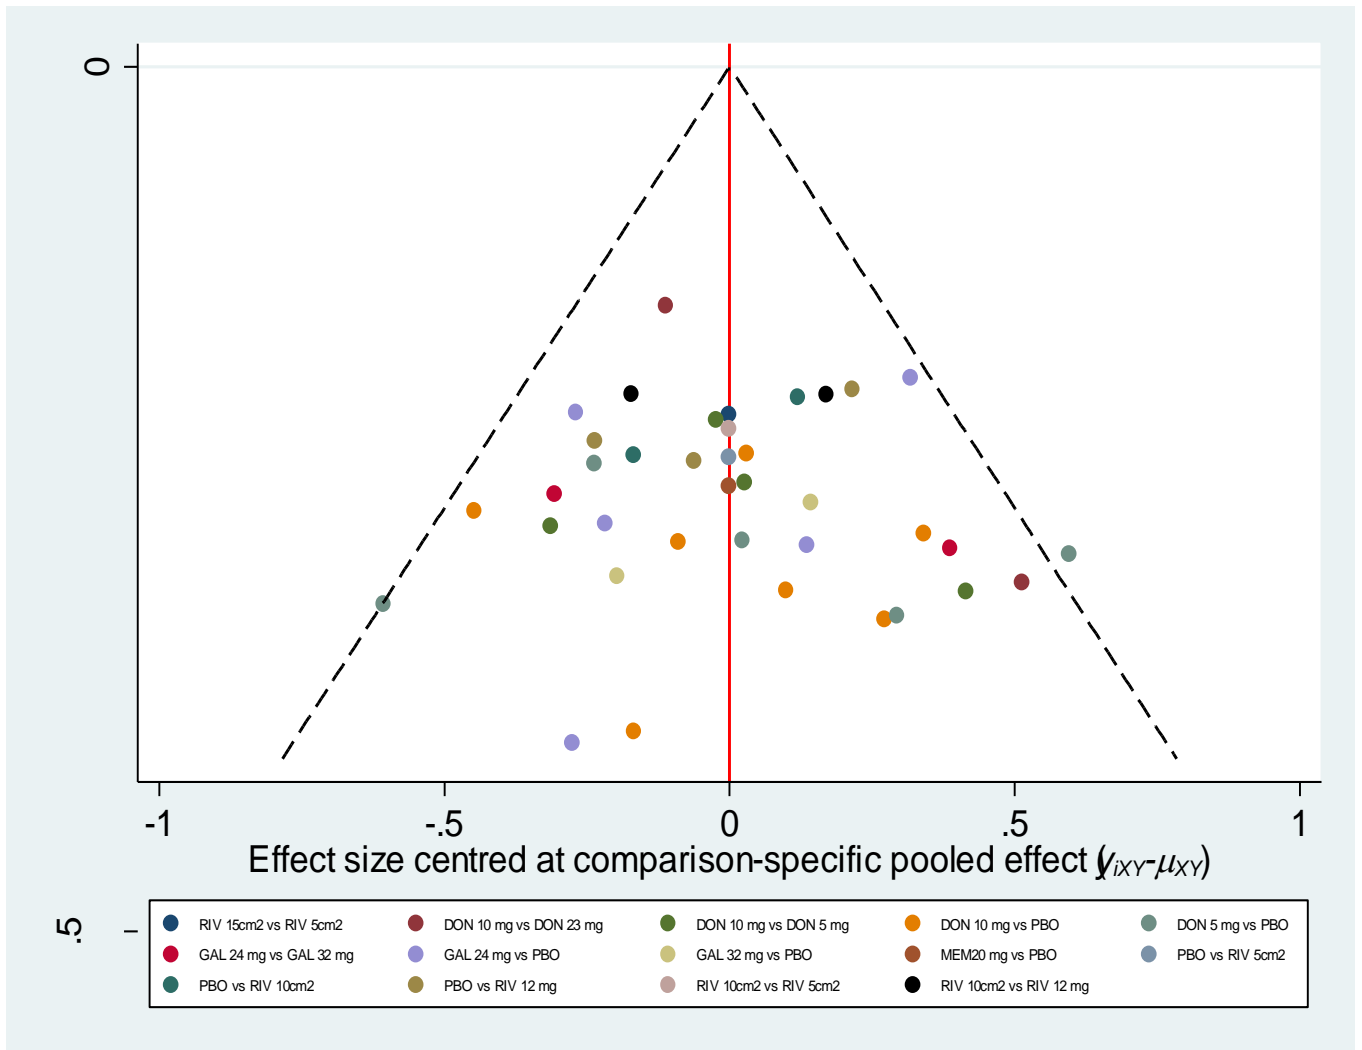

**Supplementary 11:  
Subgroup network meta-analysis for secondary outcomes**

**Efficacy on function for mild to moderate AD**

| NO. | Interventions                  |
|-----|--------------------------------|
| 1   | Placebo                        |
| 2   | Galantamine 24mg               |
| 3   | Rivastigmine 12mg              |
| 4   | Rivastigmine 10cm <sup>2</sup> |
| 5   | Rivastigmine 15cm <sup>2</sup> |
| 6   | Memantine 20mg                 |

| node     | mean     | sd     | MC error | 2.50%    | median   | 97.50%  | start | sample |
|----------|----------|--------|----------|----------|----------|---------|-------|--------|
| SMD[1,2] | 0.2507   | 0.1107 | 5.15E-04 | 0.04471  | 0.2507   | 0.4552  | 50001 | 300000 |
| SMD[1,3] | 0.1979   | 0.145  | 8.83E-04 | -0.06983 | 0.1975   | 0.4678  | 50001 | 300000 |
| SMD[1,4] | 0.2286   | 0.1456 | 0.001003 | -0.03855 | 0.228    | 0.5016  | 50001 | 300000 |
| SMD[1,5] | 0.4113   | 0.2129 | 0.001371 | 0.02037  | 0.4106   | 0.8064  | 50001 | 300000 |
| SMD[1,6] | 0.01232  | 0.1166 | 6.36E-04 | -0.2041  | 0.01221  | 0.2276  | 50001 | 300000 |
| SMD[2,3] | -0.05283 | 0.1829 | 0.001059 | -0.389   | -0.05267 | 0.2863  | 50001 | 300000 |
| SMD[2,4] | -0.02214 | 0.1834 | 0.001153 | -0.3604  | -0.0221  | 0.3193  | 50001 | 300000 |
| SMD[2,5] | 0.1605   | 0.2405 | 0.001479 | -0.2817  | 0.1611   | 0.6069  | 50001 | 300000 |
| SMD[2,6] | -0.2384  | 0.161  | 7.97E-04 | -0.5386  | -0.2393  | 0.05716 | 50001 | 300000 |
| SMD[3,4] | 0.03069  | 0.1121 | 5.61E-04 | -0.1754  | 0.03017  | 0.2379  | 50001 | 300000 |
| SMD[3,5] | 0.2134   | 0.1916 | 0.001001 | -0.1415  | 0.2138   | 0.5663  | 50001 | 300000 |
| SMD[3,6] | -0.1856  | 0.1859 | 0.001114 | -0.5307  | -0.1859  | 0.1572  | 50001 | 300000 |
| SMD[4,5] | 0.1827   | 0.1551 | 7.44E-04 | -0.1041  | 0.1827   | 0.4676  | 50001 | 300000 |
| SMD[4,6] | -0.2163  | 0.1862 | 0.001202 | -0.5631  | -0.215   | 0.1288  | 50001 | 300000 |
| SMD[5,6] | -0.3989  | 0.2426 | 0.001528 | -0.8503  | -0.3976  | 0.04619 | 50001 | 300000 |

**Efficacy on function for moderate to severe AD**

| NO. | Interventions                   |
|-----|---------------------------------|
| 1   | Placebo                         |
| 2   | Donepezil 10 mg                 |
| 3   | Galantamine 24 mg               |
| 4   | Rivastigmine 12 mg              |
| 5   | Memantine 20 mg                 |
| 6   | Memantine 20 mg+Donepezil 10 mg |

| node     | mean     | sd     | MC error | 2.50%    | median    | 97.50% | start | sample |
|----------|----------|--------|----------|----------|-----------|--------|-------|--------|
| SMD[1,2] | 0.1854   | 0.088  | 6.42E-04 | 0.01482  | 0.1846    | 0.361  | 50001 | 300000 |
| SMD[1,3] | 0.09063  | 0.1714 | 9.19E-04 | -0.2487  | 0.09055   | 0.4304 | 50001 | 300000 |
| SMD[1,4] | 0.2225   | 0.1531 | 0.001088 | -0.1237  | 0.2339    | 0.492  | 50001 | 300000 |
| SMD[1,5] | 0.1834   | 0.1048 | 6.48E-04 | -0.02293 | 0.1828    | 0.3918 | 50001 | 300000 |
| SMD[1,6] | 0.3881   | 0.1383 | 0.001063 | 0.1163   | 0.3868    | 0.6642 | 50001 | 300000 |
| SMD[2,3] | -0.09482 | 0.1923 | 0.001136 | -0.4776  | -0.09493  | 0.2842 | 50001 | 300000 |
| SMD[2,4] | 0.03707  | 0.1369 | 8.19E-04 | -0.287   | 0.05128   | 0.2655 | 50001 | 300000 |
| SMD[2,5] | -0.00203 | 0.1266 | 8.65E-04 | -0.2525  | -0.001441 | 0.2456 | 50001 | 300000 |
| SMD[2,6] | 0.2027   | 0.1248 | 8.84E-04 | -0.04406 | 0.2028    | 0.4506 | 50001 | 300000 |
| SMD[3,4] | 0.1319   | 0.2298 | 0.001458 | -0.3659  | 0.1433    | 0.5517 | 50001 | 300000 |
| SMD[3,5] | 0.09279  | 0.2004 | 0.001128 | -0.3018  | 0.0929    | 0.4896 | 50001 | 300000 |
| SMD[3,6] | 0.2975   | 0.2201 | 0.001459 | -0.1365  | 0.296     | 0.7349 | 50001 | 300000 |
| SMD[4,5] | -0.03909 | 0.1801 | 0.001241 | -0.3612  | -0.05062  | 0.3604 | 50001 | 300000 |
| SMD[4,6] | 0.1656   | 0.1831 | 0.001264 | -0.1568  | 0.1534    | 0.5732 | 50001 | 300000 |
| SMD[5,6] | 0.2047   | 0.1585 | 0.001219 | -0.1045  | 0.2035    | 0.5199 | 50001 | 300000 |

#### Efficacy on behavior for mild to moderate AD

| NO. | Interventions                        |
|-----|--------------------------------------|
| 1   | Placebo                              |
| 2   | Donepezil 10 mg                      |
| 3   | Galantamine 24 mg                    |
| 4   | Rivastigmine 12 mg                   |
| 5   | Rivastigmine patch 10cm <sup>2</sup> |
| 6   | Memantine 20 mg                      |

| node     | mean     | sd     | MC error | 2.50%   | median   | 97.50% | start | sample |
|----------|----------|--------|----------|---------|----------|--------|-------|--------|
| SMD[1,2] | -0.1     | 0.2294 | 7.95E-04 | -0.5641 | -0.0995  | 0.3639 | 50001 | 300000 |
| SMD[1,3] | -0.1528  | 0.1941 | 4.97E-04 | -0.5527 | -0.1527  | 0.2471 | 50001 | 300000 |
| SMD[1,4] | -0.03442 | 0.2576 | 9.57E-04 | -0.5639 | -0.034   | 0.495  | 50001 | 300000 |
| SMD[1,5] | -0.00378 | 0.2572 | 9.98E-04 | -0.5312 | -0.00353 | 0.5241 | 50001 | 300000 |
| SMD[1,6] | -0.1318  | 0.1796 | 5.62E-04 | -0.5109 | -0.1265  | 0.2222 | 50001 | 300000 |
| SMD[2,3] | -0.05279 | 0.3    | 9.36E-04 | -0.6619 | -0.05261 | 0.5569 | 50001 | 300000 |
| SMD[2,4] | 0.06562  | 0.3452 | 0.001231 | -0.638  | 0.06579  | 0.7721 | 50001 | 300000 |
| SMD[2,5] | 0.09625  | 0.3449 | 0.00127  | -0.6048 | 0.09545  | 0.8005 | 50001 | 300000 |
| SMD[2,6] | -0.03178 | 0.2312 | 7.26E-04 | -0.5072 | -0.02779 | 0.4217 | 50001 | 300000 |
| SMD[3,4] | 0.1184   | 0.3224 | 0.001067 | -0.5469 | 0.1194   | 0.781  | 50001 | 300000 |
| SMD[3,5] | 0.149    | 0.3226 | 0.001105 | -0.5146 | 0.1487   | 0.8108 | 50001 | 300000 |
| SMD[3,6] | 0.02101  | 0.264  | 7.60E-04 | -0.5317 | 0.02689  | 0.5486 | 50001 | 300000 |
| SMD[4,5] | 0.03064  | 0.1939 | 3.98E-04 | -0.3684 | 0.03048  | 0.4281 | 50001 | 300000 |
| SMD[4,6] | -0.0974  | 0.3144 | 0.001112 | -0.755  | -0.09138 | 0.5336 | 50001 | 300000 |
| SMD[5,6] | -0.128   | 0.3139 | 0.001161 | -0.7823 | -0.1213  | 0.5028 | 50001 | 300000 |



### Efficacy on behavior for moderate to severe AD

| NO. | Interventions   |
|-----|-----------------|
| 1   | Placebo         |
| 2   | Donepezil 10 mg |
| 3   | Memantine 20 mg |

| node     | mean     | sd     | MC error | 2.50%   | median   | 97.50% | start | sample |
|----------|----------|--------|----------|---------|----------|--------|-------|--------|
| SMD[1,2] | -0.123   | 0.1348 | 3.87E-04 | -0.3919 | -0.1239  | 0.1503 | 50001 | 300000 |
| SMD[1,3] | -0.03901 | 0.1533 | 4.19E-04 | -0.351  | -0.03787 | 0.2683 | 50001 | 300000 |
| SMD[2,3] | 0.08395  | 0.2039 | 5.68E-04 | -0.332  | 0.08609  | 0.4921 | 50001 | 300000 |

### Efficacy on global changes for mild to moderate AD

| NO. | Interventions                        |
|-----|--------------------------------------|
| 1   | Placebo                              |
| 2   | Donepezil 5 mg                       |
| 3   | Donepezil 10 mg                      |
| 4   | Galantamine 24 mg                    |
| 5   | Galantamine 32 mg                    |
| 6   | Rivastigmine 12 mg                   |
| 7   | Rivastigmine patch 10cm <sup>2</sup> |
| 8   | Rivastigmine patch 5cm <sup>2</sup>  |

| node    | mean   | sd     | MC error | 2.50%  | median | 97.50% | start | sample |
|---------|--------|--------|----------|--------|--------|--------|-------|--------|
| or[1,2] | 2.377  | 0.4047 | 0.002701 | 1.688  | 2.339  | 3.276  | 50001 | 300000 |
| or[1,3] | 2.52   | 0.4416 | 0.002795 | 1.755  | 2.485  | 3.492  | 50001 | 300000 |
| or[1,4] | 1.345  | 0.194  | 0.001268 | 0.9931 | 1.333  | 1.758  | 50001 | 300000 |
| or[1,5] | 1.479  | 0.3293 | 0.002106 | 0.9273 | 1.445  | 2.216  | 50001 | 300000 |
| or[1,6] | 1.79   | 0.2882 | 0.001509 | 1.295  | 1.765  | 2.431  | 50001 | 300000 |
| or[1,7] | 1.561  | 0.283  | 0.001554 | 1.082  | 1.535  | 2.193  | 50001 | 300000 |
| or[1,8] | 1.537  | 0.4422 | 0.002839 | 0.8556 | 1.477  | 2.564  | 50001 | 300000 |
| or[2,3] | 1.075  | 0.1858 | 0.001228 | 0.7469 | 1.061  | 1.477  | 50001 | 300000 |
| or[2,4] | 0.5818 | 0.1298 | 8.57E-04 | 0.3624 | 0.5702 | 0.8688 | 50001 | 300000 |
| or[2,5] | 0.6398 | 0.1798 | 0.001179 | 0.3531 | 0.618  | 1.054  | 50001 | 300000 |
| or[2,6] | 0.7745 | 0.1831 | 0.001135 | 0.4769 | 0.7545 | 1.193  | 50001 | 300000 |
| or[2,7] | 0.6756 | 0.1695 | 0.001045 | 0.4026 | 0.6561 | 1.063  | 50001 | 300000 |
| or[2,8] | 0.6651 | 0.2249 | 0.001429 | 0.3306 | 0.6314 | 1.192  | 50001 | 300000 |
| or[3,4] | 0.55   | 0.1263 | 8.28E-04 | 0.3425 | 0.536  | 0.8338 | 50001 | 300000 |
| or[3,5] | 0.605  | 0.1746 | 0.001145 | 0.3328 | 0.5813 | 1.011  | 50001 | 300000 |
| or[3,6] | 0.7323 | 0.1781 | 0.001065 | 0.4483 | 0.7114 | 1.142  | 50001 | 300000 |
| or[3,7] | 0.6387 | 0.1641 | 9.40E-04 | 0.3787 | 0.6187 | 1.017  | 50001 | 300000 |
| or[3,8] | 0.6291 | 0.2177 | 0.001384 | 0.3123 | 0.5954 | 1.146  | 50001 | 300000 |
| or[4,5] | 1.111  | 0.2448 | 0.001476 | 0.7047 | 1.086  | 1.663  | 50001 | 300000 |

|         |        |        |          |        |        |       |       |        |
|---------|--------|--------|----------|--------|--------|-------|-------|--------|
| or[4,6] | 1.359  | 0.3013 | 0.00179  | 0.8781 | 1.324  | 2.052 | 50001 | 300000 |
| or[4,7] | 1.186  | 0.281  | 0.001675 | 0.7379 | 1.153  | 1.83  | 50001 | 300000 |
| or[4,8] | 1.167  | 0.3853 | 0.002321 | 0.6061 | 1.108  | 2.076 | 50001 | 300000 |
| or[5,6] | 1.271  | 0.359  | 0.002141 | 0.7223 | 1.221  | 2.116 | 50001 | 300000 |
| or[5,7] | 1.108  | 0.3272 | 0.001898 | 0.6125 | 1.064  | 1.877 | 50001 | 300000 |
| or[5,8] | 1.091  | 0.4104 | 0.002496 | 0.5135 | 1.022  | 2.075 | 50001 | 300000 |
| or[6,7] | 0.8827 | 0.1558 | 8.34E-04 | 0.6136 | 0.8701 | 1.226 | 50001 | 300000 |
| or[6,8] | 0.8744 | 0.2697 | 0.001645 | 0.4642 | 0.8365 | 1.502 | 50001 | 300000 |
| or[7,8] | 0.9991 | 0.2815 | 0.00158  | 0.5605 | 0.9635 | 1.649 | 50001 | 300000 |

**Efficacy on global changes for moderate to severe AD**

|     |                |
|-----|----------------|
| NO. | Interventions  |
| 1   | Placebo        |
| 2   | Donepezil 10mg |
| 3   | Donepezil 23mg |

| node    | mean  | sd    | MC error | 2.50%  | median | 97.50% | start | sample |
|---------|-------|-------|----------|--------|--------|--------|-------|--------|
| or[1,2] | 2.175 | 24.41 | 0.04983  | 0.6974 | 1.712  | 4.334  | 50001 | 300000 |
| or[1,3] | 42.9  | 18500 | 33.83    | 0.3418 | 1.531  | 5.941  | 50001 | 300000 |
| or[2,3] | 1.873 | 144.1 | 0.2663   | 0.2721 | 0.8985 | 2.477  | 50001 | 300000 |

**Supplementary 12:**  
**Sensitivity network meta-analysis for primary outcomes**

**Efficacy on cognition for mild to moderate AD**

| NO. | Interventions                   |
|-----|---------------------------------|
| 1   | Placebo                         |
| 2   | Donepezil 5 mg                  |
| 3   | Donepezil 10 mg                 |
| 4   | Glantamine 24 mg                |
| 5   | Galantamine 32 mg               |
| 6   | Rivastigmine 12 mg              |
| 7   | Rivastigmine 10 cm <sup>2</sup> |
| 8   | Rivastigmine 5 cm <sup>2</sup>  |
| 9   | Memantine 20 mg                 |

| node     | mean      | sd      | MC error | 2.50%   | median    | 97.50%    | start | sample |
|----------|-----------|---------|----------|---------|-----------|-----------|-------|--------|
| SMD[1,2] | -0.3192   | 0.06619 | 6.70E-04 | -0.4517 | -0.3192   | -0.1901   | 50001 | 300000 |
| SMD[1,3] | -0.4341   | 0.06251 | 6.68E-04 | -0.5541 | -0.4355   | -0.3092   | 50001 | 300000 |
| SMD[1,4] | -0.5208   | 0.05332 | 5.30E-04 | -0.6258 | -0.5209   | -0.4174   | 50001 | 300000 |
| SMD[1,5] | -0.523    | 0.07649 | 7.54E-04 | -0.6747 | -0.5226   | -0.371    | 50001 | 300000 |
| SMD[1,6] | -0.2927   | 0.05672 | 4.91E-04 | -0.4044 | -0.2929   | -0.1807   | 50001 | 300000 |
| SMD[1,7] | -0.2574   | 0.0637  | 5.85E-04 | -0.3843 | -0.2575   | -0.1309   | 50001 | 300000 |
| SMD[1,8] | -0.1689   | 0.09414 | 9.14E-04 | -0.3553 | -0.1693   | 0.01613   | 50001 | 300000 |
| SMD[1,9] | -0.2412   | 0.07476 | 7.68E-04 | -0.3895 | -0.2402   | -0.09634  | 50001 | 300000 |
| SMD[2,3] | -0.115    | 0.07286 | 7.89E-04 | -0.2541 | -0.1171   | 0.03341   | 50001 | 300000 |
| SMD[2,4] | -0.2016   | 0.08442 | 8.30E-04 | -0.3677 | -0.2021   | -0.03541  | 50001 | 300000 |
| SMD[2,5] | -0.2039   | 0.1006  | 9.93E-04 | -0.4012 | -0.2038   | -0.005846 | 50001 | 300000 |
| SMD[2,6] | 0.02642   | 0.08739 | 8.39E-04 | -0.1454 | 0.02628   | 0.1999    | 50001 | 300000 |
| SMD[2,7] | 0.06177   | 0.09113 | 8.37E-04 | -0.118  | 0.06168   | 0.2434    | 50001 | 300000 |
| SMD[2,8] | 0.1502    | 0.1148  | 0.001135 | -0.076  | 0.1506    | 0.3778    | 50001 | 300000 |
| SMD[2,9] | 0.078     | 0.09702 | 0.001006 | -0.1119 | 0.07797   | 0.2686    | 50001 | 300000 |
| SMD[3,4] | -0.08665  | 0.08174 | 8.56E-04 | -0.2516 | -0.08533  | 0.06984   | 50001 | 300000 |
| SMD[3,5] | -0.08888  | 0.09886 | 0.00101  | -0.2882 | -0.08645  | 0.09974   | 50001 | 300000 |
| SMD[3,6] | 0.1414    | 0.08431 | 8.43E-04 | -0.0269 | 0.1422    | 0.3037    | 50001 | 300000 |
| SMD[3,7] | 0.1768    | 0.0889  | 8.91E-04 | -0.0015 | 0.1778    | 0.3477    | 50001 | 300000 |
| SMD[3,8] | 0.2652    | 0.1136  | 0.001161 | 0.03766 | 0.2671    | 0.4845    | 50001 | 300000 |
| SMD[3,9] | 0.193     | 0.08924 | 9.60E-04 | 0.01494 | 0.1948    | 0.366     | 50001 | 300000 |
| SMD[4,5] | -0.002237 | 0.07458 | 7.49E-04 | -0.1504 | -0.002323 | 0.1446    | 50001 | 300000 |
| SMD[4,6] | 0.2281    | 0.07782 | 7.28E-04 | 0.07633 | 0.2279    | 0.3818    | 50001 | 300000 |
| SMD[4,7] | 0.2634    | 0.08281 | 7.63E-04 | 0.1023  | 0.2625    | 0.4274    | 50001 | 300000 |
| SMD[4,8] | 0.3519    | 0.1081  | 0.001051 | 0.1394  | 0.3516    | 0.5648    | 50001 | 300000 |
| SMD[4,9] | 0.2796    | 0.09144 | 9.03E-04 | 0.09971 | 0.2801    | 0.4606    | 50001 | 300000 |

|          |          |         |          |         |          |        |       |        |
|----------|----------|---------|----------|---------|----------|--------|-------|--------|
| SMD[5,6] | 0.2303   | 0.09528 | 9.22E-04 | 0.04444 | 0.2304   | 0.4196 | 50001 | 300000 |
| SMD[5,7] | 0.2656   | 0.09951 | 9.48E-04 | 0.0696  | 0.2653   | 0.4628 | 50001 | 300000 |
| SMD[5,8] | 0.3541   | 0.1214  | 0.00118  | 0.1149  | 0.354    | 0.5942 | 50001 | 300000 |
| SMD[5,9] | 0.2819   | 0.1058  | 0.001006 | 0.07248 | 0.2817   | 0.4898 | 50001 | 300000 |
| SMD[6,7] | 0.03535  | 0.06423 | 5.88E-04 | -0.0918 | 0.03585  | 0.1611 | 50001 | 300000 |
| SMD[6,8] | 0.1238   | 0.1026  | 9.63E-04 | -0.0802 | 0.1234   | 0.3256 | 50001 | 300000 |
| SMD[6,9] | 0.05158  | 0.09414 | 9.43E-04 | -0.135  | 0.05209  | 0.2338 | 50001 | 300000 |
| SMD[7,8] | 0.08847  | 0.09402 | 8.94E-04 | -0.0987 | 0.08841  | 0.2731 | 50001 | 300000 |
| SMD[7,9] | 0.01623  | 0.09858 | 9.79E-04 | -0.1795 | 0.01677  | 0.2083 | 50001 | 300000 |
| SMD[8,9] | -0.07224 | 0.1205  | 0.001216 | -0.3123 | -0.07158 | 0.1645 | 50001 | 300000 |

#### Efficacy on cognition for moderate to severe AD

| NO. | Interventions                     |
|-----|-----------------------------------|
| 1   | Placebo                           |
| 2   | Donepezil 10 mg                   |
| 3   | Donepezil 23 mg                   |
| 4   | Memantine 20 mg                   |
| 5   | Memantine 20 mg + Donepezil 10 mg |

| node     | mean    | sd     | MC error | 2.50%    | median  | 97.50% | start | sample |
|----------|---------|--------|----------|----------|---------|--------|-------|--------|
| SMD[1,2] | 0.5261  | 0.1654 | 5.73E-04 | 0.195    | 0.5246  | 0.8655 | 50001 | 300000 |
| SMD[1,3] | 0.5883  | 0.2785 | 8.68E-04 | 0.01865  | 0.5889  | 1.155  | 50001 | 300000 |
| SMD[1,4] | 0.3369  | 0.2113 | 6.59E-04 | -0.05751 | 0.3254  | 0.7945 | 50001 | 300000 |
| SMD[1,5] | 0.8819  | 0.3608 | 0.001009 | 0.1509   | 0.8803  | 1.619  | 50001 | 300000 |
| SMD[2,3] | 0.06219 | 0.2244 | 4.71E-04 | -0.4034  | 0.06528 | 0.5144 | 50001 | 300000 |
| SMD[2,4] | -0.1891 | 0.2672 | 8.39E-04 | -0.7004  | -0.1987 | 0.378  | 50001 | 300000 |
| SMD[2,5] | 0.3558  | 0.3209 | 6.90E-04 | -0.2986  | 0.3565  | 1.008  | 50001 | 300000 |
| SMD[3,4] | -0.2513 | 0.35   | 0.001065 | -0.9257  | -0.264  | 0.4903 | 50001 | 300000 |
| SMD[3,5] | 0.2936  | 0.3921 | 8.23E-04 | -0.5032  | 0.2913  | 1.098  | 50001 | 300000 |
| SMD[4,5] | 0.5449  | 0.4171 | 0.001163 | -0.3301  | 0.5561  | 1.362  | 50001 | 300000 |

#### All-cause adverse events for mild to moderate AD

| NO. | Interventions                   |
|-----|---------------------------------|
| 1   | Placebo                         |
| 2   | Donepezil 5 mg                  |
| 3   | Donepezil 10 mg                 |
| 4   | Glantamine 24 mg                |
| 5   | Galantamine 32 mg               |
| 6   | Rivastigmine 12 mg              |
| 7   | Rivastigmine 10 cm <sup>2</sup> |
| 8   | Rivastigmine 5 cm <sup>2</sup>  |
| 9   | Memantine 20 mg                 |

| node    | mean   | sd     | MC error | 2.50%  | median | 97.50% | start | sample |
|---------|--------|--------|----------|--------|--------|--------|-------|--------|
| or[1,2] | 1.428  | 0.3518 | 0.001627 | 0.8675 | 1.385  | 2.237  | 50001 | 300000 |
| or[1,3] | 1.787  | 0.409  | 0.002073 | 1.106  | 1.747  | 2.708  | 50001 | 300000 |
| or[1,4] | 1.587  | 0.2832 | 0.001546 | 1.126  | 1.554  | 2.242  | 50001 | 300000 |
| or[1,5] | 2.621  | 0.7083 | 0.003568 | 1.52   | 2.526  | 4.271  | 50001 | 300000 |
| or[1,6] | 2.847  | 0.5546 | 0.002814 | 1.971  | 2.778  | 4.127  | 50001 | 300000 |
| or[1,7] | 1.667  | 0.3489 | 0.001579 | 1.11   | 1.625  | 2.479  | 50001 | 300000 |
| or[1,8] | 1.799  | 0.6115 | 0.003219 | 0.9144 | 1.707  | 3.247  | 50001 | 300000 |
| or[1,9] | 1.037  | 0.2522 | 9.67E-04 | 0.6273 | 1.009  | 1.617  | 50001 | 300000 |
| or[2,3] | 1.305  | 0.3768 | 0.001872 | 0.7101 | 1.26   | 2.169  | 50001 | 300000 |
| or[2,4] | 1.177  | 0.3693 | 0.001654 | 0.6361 | 1.12   | 2.048  | 50001 | 300000 |
| or[2,5] | 1.943  | 0.7307 | 0.003346 | 0.9082 | 1.825  | 3.684  | 50001 | 300000 |
| or[2,6] | 2.111  | 0.6866 | 0.003108 | 1.118  | 2.005  | 3.729  | 50001 | 300000 |
| or[2,7] | 1.236  | 0.4123 | 0.001772 | 0.6348 | 1.173  | 2.208  | 50001 | 300000 |
| or[2,8] | 1.334  | 0.5821 | 0.002735 | 0.5592 | 1.232  | 2.722  | 50001 | 300000 |
| or[2,9] | 0.7692 | 0.2734 | 0.001153 | 0.3694 | 0.7291 | 1.41   | 50001 | 300000 |
| or[3,4] | 0.9355 | 0.2856 | 0.001428 | 0.5214 | 0.8898 | 1.618  | 50001 | 300000 |
| or[3,5] | 1.544  | 0.5689 | 0.002749 | 0.7434 | 1.446  | 2.912  | 50001 | 300000 |
| or[3,6] | 1.679  | 0.5335 | 0.002678 | 0.92   | 1.592  | 2.951  | 50001 | 300000 |
| or[3,7] | 0.9833 | 0.3226 | 0.001523 | 0.5255 | 0.9306 | 1.753  | 50001 | 300000 |
| or[3,8] | 1.061  | 0.4572 | 0.002374 | 0.4569 | 0.9774 | 2.167  | 50001 | 300000 |
| or[3,9] | 0.6112 | 0.213  | 9.57E-04 | 0.3046 | 0.5771 | 1.115  | 50001 | 300000 |
| or[4,5] | 1.679  | 0.4576 | 0.002404 | 0.9516 | 1.625  | 2.73   | 50001 | 300000 |
| or[4,6] | 1.847  | 0.4825 | 0.002086 | 1.089  | 1.787  | 2.963  | 50001 | 300000 |
| or[4,7] | 1.082  | 0.2944 | 0.001281 | 0.6181 | 1.046  | 1.763  | 50001 | 300000 |
| or[4,8] | 1.168  | 0.4486 | 0.002327 | 0.5289 | 1.098  | 2.224  | 50001 | 300000 |
| or[4,9] | 0.6734 | 0.2017 | 8.82E-04 | 0.3536 | 0.6499 | 1.135  | 50001 | 300000 |
| or[5,6] | 1.163  | 0.3984 | 0.001858 | 0.5915 | 1.101  | 2.105  | 50001 | 300000 |
| or[5,7] | 0.6814 | 0.2401 | 0.001102 | 0.3381 | 0.6428 | 1.248  | 50001 | 300000 |
| or[5,8] | 0.7354 | 0.3324 | 0.001667 | 0.2995 | 0.676  | 1.534  | 50001 | 300000 |
| or[5,9] | 0.4239 | 0.1581 | 7.09E-04 | 0.1962 | 0.3993 | 0.7957 | 50001 | 300000 |
| or[6,7] | 0.5954 | 0.1183 | 4.54E-04 | 0.3912 | 0.5856 | 0.8596 | 50001 | 300000 |
| or[6,8] | 0.6486 | 0.2354 | 0.001179 | 0.305  | 0.6141 | 1.199  | 50001 | 300000 |
| or[6,9] | 0.3773 | 0.1165 | 4.88E-04 | 0.1934 | 0.3637 | 0.6438 | 50001 | 300000 |
| or[7,8] | 1.102  | 0.3733 | 0.001883 | 0.5476 | 1.05   | 1.978  | 50001 | 300000 |
| or[7,9] | 0.6478 | 0.2085 | 8.66E-04 | 0.3274 | 0.6209 | 1.13   | 50001 | 300000 |
| or[8,9] | 0.6387 | 0.2743 | 0.001287 | 0.2656 | 0.5927 | 1.288  | 50001 | 300000 |

**Supplementary 13:**  
**Assessment of heterogeneity results for each outcome**

**Efficacy on cognition for mild to moderate AD**

| Comparisons                                                           | I <sup>2</sup> pair | I <sup>2</sup> cons | incons.P |
|-----------------------------------------------------------------------|---------------------|---------------------|----------|
| Placebo vs Donepezil 5 mg                                             | 0%                  | 0%                  | NA       |
| Placebo vs Donepezil 10 mg                                            | 50.79%              | 42.86%              | 0.55     |
| Placebo vs Galantamine 24 mg                                          | 0%                  | 0%                  | NA       |
| Placebo vs Galantamine 32 mg                                          | 0%                  | 0%                  | NA       |
| Placebo vs Rivastigmine 12 mg                                         | 34.59               | 26.66%              | 0.32     |
| Placebo vs Rivastigmine 10 cm <sup>2</sup>                            | 0%                  | 0%                  | 0.49     |
| Placebo vs Rivastigmine 5 cm <sup>2</sup>                             | NA                  | NA                  | NA       |
| Placebo vs Memantine 20 mg                                            | 0.96%               | 48.15%              | 0.10     |
| Donepezil 5 mg vs Donepezil 10 mg                                     | 0%                  | 39.48%              | 0.08     |
| Donepezil 10 mg vs Memantine 20 mg                                    | NA                  | 25.63%              | 0.26     |
| Galantamine 24 mg vs Galantamine 32 mg                                | 0%                  | 0%                  | NA       |
| Rivastigmine 12 mg vs Rivastigmine 10 cm <sup>2</sup>                 | 0%                  | 0%                  | 0.34     |
| Rivastigmine 10cm <sup>2</sup> vs Rivastigmine 5cm <sup>2</sup>       | NA                  | NA                  | NA       |
| Rivastigmine 10cm <sup>2</sup> vs Rivastigmine 15cm <sup>2</sup>      | NA                  | NA                  | NA       |
| Global I-squared: I <sup>2</sup> pair: 0.06%; I <sup>2</sup> cons: 0% |                     |                     |          |

**All-cause adverse events for mild to moderate AD**

| Comparisons                                                                 | I <sup>2</sup> pair | I <sup>2</sup> cons | incons.P |
|-----------------------------------------------------------------------------|---------------------|---------------------|----------|
| Placebo vs Donepezil 5 mg                                                   | 49.15%              | 55.75%              | NA       |
| Placebo vs Donepezil 10 mg                                                  | 19.72%              | 24.53%              | NA       |
| Placebo vs Galantamine 24 mg                                                | 63.20%              | 67.01%              | NA       |
| Placebo vs Galantamine 32 mg                                                | 0                   | 0                   | NA       |
| Placebo vs Rivastigmine 12 mg                                               | 58.30%              | 40.83%              | 0.56     |
| Placebo vs Rivastigmine 10cm <sup>2</sup>                                   | 40.99%              | 51.71%              | 0.17     |
| Placebo vs Rivastigmine 5cm <sup>2</sup>                                    | NA                  | NA                  | NA       |
| Placebo vs Memantine 20 mg                                                  | 0                   | 0                   | NA       |
| Donepezil 5 mg vs Donepezil 10 mg                                           | 0                   | 41.35%              | 0.09     |
| Galantamine 24 mg vs Galantamine 32 mg                                      | 0                   | 0                   | NA       |
| Rivastigmine 12 mg vs Rivastigmine 10cm <sup>2</sup>                        | 0                   | 0                   | 0.27     |
| Rivastigmine 10cm <sup>2</sup> vs Rivastigmine 5cm <sup>2</sup>             | NA                  | NA                  | NA       |
| Rivastigmine 10cm <sup>2</sup> vs Rivastigmine 15cm <sup>2</sup>            | NA                  | NA                  | NA       |
| Global I-squared: I <sup>2</sup> pair: 40.42 %; I <sup>2</sup> cons: 39.15% |                     |                     |          |

### Efficacy on cognition for moderate to severe AD

| Comparisons                                                                 | I <sup>2</sup> pair | I <sup>2</sup> cons | incons.P |
|-----------------------------------------------------------------------------|---------------------|---------------------|----------|
| Placebo vs Donepezil 10 mg                                                  | 73.50%              | 72.32%              | NA       |
| Placebo vs Memantine 20 mg                                                  | 72.95%              | 79.58%              | NA       |
| Placebo vs Memantine 20 mg+Donepezil 10 mg                                  | NA                  | 95.09%              | 0.07%    |
| Donepezil 10 mg vs Donepezil 23 mg                                          | 72.56%              | 72.56%              | NA       |
| Donepezil 10 mg vs Memantine 20 mg                                          | NA                  | 0                   | 0.77%    |
| Donepezil 10 mg vs Memantine 20 mg+Donepezil 10 mg                          | 81.99%              | 88.48%              | NA       |
| Memantine 20 mg vs Memantine 20 mg+Donepezil 10 mg                          | NA                  | 45.65%              | 0.48%    |
| Global I-squared: I <sup>2</sup> pair: 74.46 %; I <sup>2</sup> cons: 80.12% |                     |                     |          |

### All-cause adverse events for moderate to severe AD

| Comparisons                                                         | I <sup>2</sup> pair | I <sup>2</sup> cons | incons.P |
|---------------------------------------------------------------------|---------------------|---------------------|----------|
| Placebo vs Donepezil 10 mg                                          | 0                   | 0                   | NA       |
| Placebo vs Memantine 20 mg                                          | 0                   | 0                   | NA       |
| Donepezil 10 mg vs Donepezil 23 mg                                  | 0                   | 0                   | NA       |
| Donepezil 10 mg vs Memantine 20 mg+Donepezil 10 mg                  | NA                  | NA                  | NA       |
| Global I-squared: I <sup>2</sup> pair: 0 %; I <sup>2</sup> cons: 0% |                     |                     |          |

### Efficacy on function

| Comparisons                                                                 | I <sup>2</sup> pair | I <sup>2</sup> cons | incons.P |
|-----------------------------------------------------------------------------|---------------------|---------------------|----------|
| Placebo vs Donepezil 10 mg                                                  | 0%                  | 17.03%              | 0.11     |
| Placebo vs Galantamine 24 mg                                                | 61.55%              | 62.31%              | NA       |
| Placebo vs Rivastigmine 12 mg                                               | 79.94%              | 95.42%              | NA       |
| Placebo vs Rivastigmine patch 10cm <sup>2</sup>                             | NA                  | 11.65%              | 0.33     |
| Placebo vs Memantine 20 mg                                                  | 0%                  | 2.10%               | 0.28     |
| Placebo vs Memantine 20 mg+Donepezil 10 mg                                  | NA                  | 44.93%              | 0.2      |
| Donepezil 10 mg vs Rivastigmine 12 mg                                       | NA                  | 70.62%              | 0.1      |
| Donepezil 10 mg vs Memantine 20 mg                                          | 0%                  | 0%                  | 0.69     |
| Donepezil 10 mg vs Memantine 20 mg+Donepezil 10 mg                          | 0%                  | 0%                  | 0.45     |
| Rivastigmine 12 mg vs Rivastigmine patch 10cm <sup>2</sup>                  | 0%                  | 0%                  | NA       |
| Rivastigmine 10cm <sup>2</sup> vs Rivastigmine 15cm <sup>2</sup>            | NA                  | NA                  | NA       |
| Rivastigmine 15cm <sup>2</sup> vs Rivastigmine 5cm <sup>2</sup>             | NA                  | NA                  | NA       |
| Memantine 20 mg vs Memantine 20 mg+Donepezil 10 mg                          | 0%                  | 61.92%              | 0.08     |
| Global I-squared: I <sup>2</sup> pair: 20.16 %; I <sup>2</sup> cons: 55.35% |                     |                     |          |

### Efficacy on behavior

| Comparisons                                                                | I <sup>2</sup> pair | I <sup>2</sup> cons | incons.P |
|----------------------------------------------------------------------------|---------------------|---------------------|----------|
| Placebo vs Donepezil 10 mg                                                 | 56.30%              | 68.47%              | 0.02     |
| Placebo vs Galantamine 24 mg                                               | 0%                  | 0%                  | NA       |
| Placebo vs Rivastigmine 12 mg                                              | NA                  | NA                  | NA       |
| Placebo vs Rivastigmine patch 10cm <sup>2</sup>                            | NA                  | NA                  | NA       |
| Placebo vs Memantine 20 mg                                                 | 53.75%              | 69.79%              | 0.01     |
| Donepezil 10 mg vs Memantine 20 mg                                         | 0%                  | 59.64%              | 0.11     |
| Rivastigmine 12 mg vs Rivastigmine 10cm <sup>2</sup>                       | 0%                  | 0%                  | NA       |
| Global I-squared: I <sup>2</sup> pair: 41.40%; I <sup>2</sup> cons: 48.64% |                     |                     |          |

### Efficacy on global changes

| Comparisons                                                                | I <sup>2</sup> pair | I <sup>2</sup> cons | incons.P |
|----------------------------------------------------------------------------|---------------------|---------------------|----------|
| Placebo vs Donepezil 5 mg                                                  | 50.24%              | 55.18%              | NA       |
| Placebo vs Donepezil 10 mg                                                 | 0%                  | 0                   | NA       |
| Placebo vs Galantamine 24 mg                                               | 33.93%              | 34.54%              | NA       |
| Placebo vs Galantamine 32 mg                                               | 0%                  | 0                   | NA       |
| Placebo vs Rivastigmine 12 mg                                              | 6.81%               | 16.29%              | NA       |
| Placebo vs Rivastigmine 10cm <sup>2</sup>                                  | 0%                  | 29.68%              | 0.17     |
| Placebo vs Rivastigmine 5cm <sup>2</sup>                                   | NA                  | NA                  | NA       |
| Placebo vs Memantine 20 mg                                                 | NA                  | NA                  | NA       |
| Donepezil 5 mg vs Donepezil 10 mg                                          | 0%                  | 52.26%              | 0.02     |
| Donepezil 10 mg vs Donepezil 23 mg                                         | 74.55%              | 76.06%              | NA       |
| Galantamine 24 mg vs Galantamine 32 mg                                     | 59.43%              | 59.66%              | NA       |
| Rivastigmine 12 mg vs Rivastigmine 10cm <sup>2</sup>                       | 23.83%              | 57.65%              | 0.08     |
| Rivastigmine 10cm <sup>2</sup> vs Rivastigmine 5cm <sup>2</sup>            | NA                  | NA                  | NA       |
| Rivastigmine 5cm <sup>2</sup> vs Rivastigmine 15cm <sup>2</sup>            | NA                  | NA                  | NA       |
| Global I-squared: I <sup>2</sup> pair: 25.48%; I <sup>2</sup> cons: 23.88% |                     |                     |          |
